1 **Title**

2 **Regulation of kinase activity by combined action of juxtamembrane**  
3 **and C-terminal regions of receptors**

4  
5 **Authors**

6 Chi-Chuan Lin<sup>1</sup>, Lukasz Wieteska<sup>1</sup>, Guillaume Poncet-Montange<sup>2</sup>, Kin M. Suen<sup>1</sup>, Stefan T. Arold<sup>3,4</sup>,  
7 Zamal Ahmed<sup>5</sup>, John E. Ladbury<sup>1\*</sup>

8  
9 **Affiliations**

10 1 School of Molecular and Cellular Biology, and Astbury Centre for Structural Molecular Biology,  
11 University of Leeds, Leeds, LS2 9JT, UK.

12 2 Center for the Development of Therapeutics, Broad Institute of MIT & Harvard, Cambridge,  
13 MA 02142, USA.

14 3 King Abdullah University of Science and Technology, Computational Bioscience Research  
15 Center, Division of Biological and Environmental Sciences and Engineering, Thuwal, 23955-6900, Saudi  
16 Arabia.

17 4 Centre de Biochimie Structurale, CNRS, INSERM, Université de Montpellier, 34090  
18 Montpellier, France.

19 5 Department of Molecular and Cellular Oncology, University of Texas, MD Anderson Cancer  
20 Center, Houston TX 77030, USA.

21 \*Corresponding author. Email: [j.e.ladbury@leeds.ac.uk](mailto:j.e.ladbury@leeds.ac.uk)

22  
23  
24 **Abstract**

25 Despite the kinetically-favorable, ATP-rich intracellular environment, the mechanism by which receptor  
26 tyrosine kinases (RTKs) repress activation prior to extracellular stimulation is poorly understood. RTKs  
27 are activated through a precise sequence of phosphorylation reactions starting with a tyrosine on the  
28 activation loop (A-loop) of the intracellular kinase domain (KD). This forms an essential mono-  
29 phosphorylated ‘active intermediate’ state on the path to further phosphorylation of the receptor. We show  
30 that this state is subjected to stringent control imposed by the peripheral juxtamembrane (JM) and C-  
31 terminal tail (CT) regions. This entails interplay between the intermolecular interaction between JM with  
32 KD, which stabilizes the asymmetric active KD dimer, and the opposing intramolecular binding of CT to  
33 KD. A further control step is provided by the previously unobserved direct binding between JM and CT.  
34 Mutations in JM and CT sites that perturb regulation are found in numerous pathologies, revealing novel  
35 sites for potential pharmaceutical intervention.

36  
37  
38  
39  
40  
41  
42  
43

## 44 Introduction

45 Receptor tyrosine kinases (RTKs) are membrane bound receptors that consist of an extracellular ligand  
46 binding domain, a single pass transmembrane region and a cytoplasmic region with kinase activity.  
47 Previously it was thought that the initiation of signaling of RTKs required ligand-induced dimerization,  
48 followed by a precise order of autophosphorylation on the kinase domain (1). However, an increasing  
49 number of studies have shown that, in the absence of ligand stimulation, many RTKs are able to self-  
50 associate into signaling incompetent dimers (2–6). Within the context of this unliganded state, the extent  
51 of phosphorylation on the kinase domain is restricted to a single tyrosine within the A-loop (4, 7, 8) with  
52 the exception of EGFR (9). This mono-phosphorylated ‘active intermediate’ state is the precursor to the  
53 subsequent phosphorylation of additional tyrosine residues. The tight regulation of the active intermediate  
54 RTKs in the absence of stimuli is a fundamental precept of numerous cellular outcomes including cell  
55 growth, motility, differentiation and metabolism upon ligand stimulation. Dysregulation of the active  
56 intermediate state can have devastating effects on ligand-independent signaling, leading to multiple  
57 pathologies including cancer, developmental abnormalities and metabolic disorders. Thus, stringent  
58 control is required to prevent spontaneous phosphorylation of RTKs within the kinetically favorable, ATP-  
59 rich intracellular environment.

60 Such control is exerted by intracellular amino acid sequences peripheral to KD, both within the  
61 juxtamembrane (JM), and the C-terminal tail (CT) regions of the receptor. The modus operandi of these  
62 regions varies across different receptors and can lead to both down- and up-regulation of kinase activity  
63 (10). Structural studies, which have focused largely on the unphosphorylated state, have shown that the  
64 binding of JM to KD results in the inhibition of kinase activity of several RTKs (PDGFR (11); Eph-family  
65 RTKs (12); MuSK (13, 14); Flt3 (15); FGFR1 (16); Kit (16, 17)). One example is the ephrin receptor B2  
66 (EphB2) in which the JM-KD interaction down-regulates activity through stabilization of the inactive  
67 conformation and constraint of the A-loop (12). In contrast, the full activity of epidermal growth factor  
68 receptor (EGFR) requires the presence of JM which links the asymmetric dimer via a ‘latch’ sequence  
69 (18, 19). The impact of CT on KD regulation has also been shown to be important in several RTKs. For  
70 instance, CT inhibits access of substrates to KD in the unphosphorylated Tie2 receptor (20). CT also  
71 suppresses the catalytic activity of EGFR through stabilization of an unphosphorylated inactive symmetric  
72 dimer (9, 21–24). The importance of CT in controlling pathogenic signal transduction is demonstrated in  
73 the expression of the constitutively active, oncogenic FGFR2 K-*sam*II gene (25). There are three variants  
74 of K-*sam*II which produce different length truncations of CT (Fig. 1A). Cells in which the truncated K-  
75 *sam* gene is amplified exhibit a growth advantage in gastric cancers. Expression of a C3 severely truncated  
76 variant in T24 bladder cells leads to un-regulated proliferation (26). Thus, the presence of CT prevents  
77 proliferative signaling from FGFR2 through an imprecisely known mechanism.

78 Our current knowledge of the regulatory roles of JM and CT is restricted to experiments based on the  
79 unphosphorylated KD with either JM or CT independently. The potential for cooperation between JM and  
80 CT towards regulation of the mono-phosphorylated, active intermediate state of the KD in the absence of  
81 RTK stimulation remains unexplored. FGFR2 provides a good example of a highly regulated RTK,  
82 particularly since the A-loop Y657-mono-phosphorylated state prevails under unliganded conditions (4).  
83 In this state FGFR2 is primed to respond rapidly to growth factor binding to produce the phosphorylated  
84 platform for recruitment of downstream effector proteins, but is subjected to stringent controls. Here we  
85 reveal the intricate mechanism by which the interplay of JM and proline-rich sequences on CT enable the  
86 receptor to sustain the active intermediate under non-stimulated conditions, and yet inhibit further catalytic  
87 activity. Our data also provide a rationale for the uncontrolled proliferation of the K-*sam* C-terminally  
88 truncated variants. Since virtually all RTKs possess JM and proline-rich sequences within their CT  
89 regions, this fine-tuning of regulation by JM and CT is likely to be conserved across RTKs. Indeed,

90 mutations of proline residues on numerous RTK CTs are connected to dysregulation of kinase activity  
91 (27–29) leading to a range of human pathologies.

## 92 Results

### 93 Activity of KD is enhanced in the presence of JM

94 JM of FGFR family receptors was predicted to play an autoinhibitory role on KD activation (16), however,  
95 direct evidence of this is lacking. The impact of JM (residues 414-465) on kinase function was investigated  
96 through four dephosphorylated FGFR2 JM-KD constructs with progressively increasing truncations of  
97 JM. The rate of phosphorylation of KD was greater with intact JM (Fig. 1B). However, deletion of the  
98 entire JM resulted in phosphorylated product, as would be expected for an unencumbered enzyme in  
99 solution. The influence of JM on phosphorylation was measured in HEK293T cells over-expressing full  
100 length FGFR2IIIb (KGFR/K-sam-IIC1, C1 isoform, FGFR2<sup>C1</sup>) including short, intermittent JM fragment  
101 deletions (Fig. 1C). Immunoblotting the A-loop phosphorylated tyrosines (pY657/pY658) in both basal  
102 and FGF7-stimulated phosphorylation of FGFR2<sup>C1</sup> was significantly reduced in all JM deletion variants  
103 confirming the importance of the intact JM.

104 To understand the precise regulatory function associated with JM to KD interaction in FGFR2, we  
105 sought to understand the effect of progressive phosphorylation of KD on JM binding. Direct interaction  
106 between an MBP-JM and a series of six mutants that mimic the sequential phosphorylation pattern of KD  
107 (KD<sup>pY1</sup> to KD<sup>pY6</sup>; schematic Fig. 1D and fig. S1A) revealed that JM bound most strongly to the mono-  
108 phosphorylated KD<sup>pY1</sup> (i.e. the ‘active intermediate’ state. Fig. 1d.  $K_{d,app} = 2.51 \pm 0.20 \mu\text{M}$ ; Table S1 and  
109 Fig. 1E and fig. S1B). The affinity of JM for KD reduced with progressive phosphorylation. Only weak  
110 binding was apparent with the unphosphorylated, catalytically inactive K518I mutant, KD<sup>K518I</sup>.

111 To determine the precise region through which JM and KD interact, we generated five JM peptides of  
112 15-16 amino acids and measured their affinities to KD<sup>pY1</sup> (table S1 and fig. S1C).  
113 <sup>414</sup>PAVHKLTKRIPLRRQVT<sup>430</sup> demonstrated the tightest binding ( $K_d = 36.8 \pm 6.2 \mu\text{M}$ ) while  
114 <sup>407</sup>KPDFSSQPAVHKL<sup>420</sup> bound only three-fold weaker. These peptides share the consensus sequence  
115 <sup>414</sup>PAVHKL<sup>420</sup> proximal to the N-terminal of JM.

116 KD residues that interact with JM were identified by NMR. Titration of JM into <sup>15</sup>N-labelled KD<sup>pY1</sup> led  
117 to major chemical shift perturbations (CSPs) in the N-lobe of KD<sup>pY1</sup> resulting from changes in chemical  
118 environment on binding; including residues 464-472 (Fig. 1F) as well as 486 and 495 (Fig. 1G) (see fig.  
119 S1D for the assignment coverage and fig. S1E for HSQC titration spectrum). Notable CSPs were also  
120 observed in residues located within the  $\alpha\text{C}$  helix (525-530; fig. S1F), which is a dynamic regulatory  
121 element of the KD. This suggests a mechanism whereby the binding of JM to the intermediate KD<sup>pY1</sup> state  
122 would promote further kinase activity.

### 123 JM binding enhances asymmetric KD dimer formation

124 Asymmetric dimerization is crucial for receptor enzymatic function. Having shown that binding of JM is  
125 important in promoting kinase activity, we next investigated the impact of JM on dimerization. A series  
126 of JM-KD polypeptides exhibiting progressively increasing phosphorylation states (fig. S2A and S2B)  
127 exhibited the highest dimer population in the mono-phosphorylated state, JM-KD<sup>pY1</sup> (Fig. 2A). In both  
128 the catalytically inactive mutants JM-KD<sup>K518I</sup> and JM-KD<sup>Y657/658F</sup>, dimerization was abrogated. The  
129 dependence of both JM binding and dimerization on the phosphorylation state of KD is consistent with  
130 JM acting as an intermolecular latch which is released with increasing pY burden.

131 To establish further how the JM affects the dimeric state of KD<sup>pY1</sup> we used three JM-KD<sup>pY1</sup> constructs  
132 with progressively truncated JM (schematic Fig. 2B). Truncation of JM resulted in an increase in the  
133 population of dimers, with isolated KD<sup>pY1</sup> showing the greatest population of dimer. We quantified the  
134 ‘apparent’ dimerization constant of the mono-phosphorylated KD in the absence of JM (KD<sup>pY1</sup>:  $K_{d,app} =$

135 112 ± 9 nM; fig. S2C). When JM was present the dimerization affinity was reduced by an order of  
136 magnitude (JM-KD<sup>pY1</sup>:  $K_{d,app} = 3.46 \pm 0.10 \mu\text{M}$  by MST (fig. S2C) and  $K_{d,app} = 3.07 \mu\text{M}$  by surface  
137 plasmon resonance, SPR (fig. S2D)). This, somewhat counter-intuitive result, suggests that although the  
138 presence of JM increases phosphorylation, it weakens dimerization of the KD. It also confirms that KD<sup>pY1</sup>  
139 and JM-KD<sup>pY1</sup> dimers are conformationally different.

140 This was confirmed using small angle X-ray scattering (SAXS). In the absence of JM, KD<sup>pY1</sup> scattering  
141 consistently revealed equilibrium between monomers, symmetric head-to-tail dimers and additional larger  
142 particles, possibly residual non-specific higher-order forms (fig. S2E and table S2). The symmetric dimer  
143 corresponds to that depicted in crystal structures of inactive FGFR2 (PDB 2PSQ (30); KD05 in fig. S2E)  
144 where access to the active site, and the positioning of the A-loop of one molecule are all encumbered by  
145 the presence of the second molecule. In stark contrast to KD<sup>pY1</sup>, in the selected ensembles of the extended  
146 JM-KD<sup>pY1</sup> the symmetric head-to-tail dimer was replaced by asymmetric dimers, with ~ 10% of these  
147 loosely connected through JM (Fig. 2C). This dramatic redistribution of polypeptide conformations is  
148 consistent with that required to produce the reduction in dimer affinity observed for JM-KD<sup>pY1</sup> compared  
149 to KD<sup>pY1</sup> (fig. S2C). The structures of these dimers are reminiscent of reported structures of the  
150 asymmetric conformations of enzyme-like (aka. receiver) and substrate-like (aka. activator) KDs caught  
151 in the act of trans-phosphorylation (30, 31). In these modelled dimeric structures, JM from one protomer  
152 binds to the other protomer, leaving one JM unoccupied (fig. S2F). Collectively, our data suggest that in  
153 the absence of ligand stimulation, through forming a latch which stabilizes the asymmetric conformation  
154 between mono-phosphorylated KDs, and hence abrogating symmetric dimer formation, JM is able to  
155 sustain a dynamic relationship between mono-phosphorylated KDs from two FGFR2 molecules to  
156 promote kinase activity and facilitate access to substrate sites. This then requires that additional control  
157 mechanism(s) have to be in place to prevent unrestrained phosphorylation of the active intermediate.

158 Further detail of KD<sup>pY1</sup> was provided by its 2.5 Å crystal structure determined in complex with a non-  
159 hydrolysable ATP analogue (PDB ID 6V6Q, table S3). The asymmetric unit contained four molecules  
160 which were arranged in two symmetric head-to-tail dimers (Fig. 2D and fig. S2G). These dimers  
161 correspond to the symmetric dimers observed in SAXS (fig. S2E). Two of the four molecules in the  
162 asymmetric unit showed well-defined electron density for the A-loop clearly featuring pY657 (fig. S2H).  
163 pY657 is positioned within a single turn  $\alpha$ -helix, and the phosphate is coordinated by three arginine  
164 residues: R626, R650 and R665 (Fig. 2E). Burial of pY657 in this way has important consequences for  
165 A-loop mobility and sustaining the mono-phosphorylated state. In support of our SAXS data, the dimeric  
166 juxtaposition of KD<sup>pY1</sup> is the same as that adopted in the published unphosphorylated kinase structure  
167 (PDB 2PSQ; Fig. 2D and fig. S2G) even though 2PSQ crystals do not contain ATP and form a different  
168 crystal lattice. The only notable differences between the two structures are found in the A- and nucleotide-  
169 binding loops. In contrast to our structure, the A-loop tyrosine residues Y656 and Y657 (corresponding to  
170 Y657 and Y658 in FGFR2IIIb) are solvent exposed in 2PSQ (Fig. 2E). KD<sup>pY1</sup> also shows features similar  
171 to the dually phosphorylated active substrate-bound kinase structure (PDB 2PVF; fig. S2I). The  
172 orientation of N and C-lobes, the  $\alpha$ C helices, and the catalytic residues K518 and E535 in the KD<sup>pY1</sup>  
173 structure are superimposable with 2PVF. However, the A-loop in 2PVF does not fold into a helix around  
174 pY657, but instead is linear (Fig. 2F). We concluded that in the absence of JM, KD<sup>pY1</sup> forms a symmetric  
175 dimer which imposes constraint on the A-loop resulting in occlusion of access of substrate and corrupts  
176 the site for correct placement of the  $\gamma$ -phosphate of ATP in the active site. The symmetric KD dimer  
177 structure is potentially relevant to the unphosphorylated receptor or when KD is constrained as part of the  
178 GRB2-bound heterotetramer (4). Furthermore, the engulfment of pY657 in the kinase core provides a  
179 possible mechanism to preserve the active intermediate mono-phosphorylated state.



180 To determine whether JM from the enzyme-like, or substrate-like protomer forms the latch and  
181 facilitates trans-phosphorylation, we incubated catalytically inactive  $KD^{K518I}$  (the substrate) with JM-  
182  $KD^{PY1}$  or  $KD^{PY1}$  (the enzymes). In this case the presence of JM increased phosphorylation of  $KD^{K518I}$  (fig.  
183 S2J). We then incubated  $KD^{PY1}$  (the enzyme) with JM- $KD^{K518I}$  or  $KD^{K518I}$  (the substrates) and observed  
184 no difference phosphorylation of the two substrates (fig. S2K). Deletion of  $^{420}TKR^{423}$  and  $^{426}RRQ^{428}$  on  
185 the enzyme-like JM- $KD^{PY1}$  (within the  $^{414}PAVHKLTKRIPLRRQVT^{430}$   $KD^{PY1}$ -binding sequence), had the  
186 biggest impact on down-regulating phosphorylation of  $KD^{K518I}$  (fig. S2L). Our data show that in the active  
187 intermediate state JM from the enzyme-like protomer latches on to the substrate-like protomer in the  
188 asymmetric active dimer and increases the phosphorylation of the latter molecule. In the absence of other  
189 regulatory interactions, this latch holds the active KDs such that they can interact with one another, whilst  
190 being prevented from self-association into the inactive symmetric dimer.

### 191 Activity of KD is inhibited by CT

192 To investigate the detailed regulatory function of CT, we first measured the impact on receptor activity of  
193 N-terminally Flag-tagged, FGFR2IIIb C-terminally truncated C1, C2, C3 K-*sam*II isoforms. HEK293T  
194 cells transfected with FGFR2<sup>C1</sup>; FGFR2<sup>C2</sup>; FGFR2<sup>C3</sup> or FGFR2<sup>C1Δ34</sup> (FGFR2<sup>C1</sup> with 34 amino acids  
195 deleted from the C-terminus that is identical in length to C2 but does not contain the Q779P, S783C and  
196 T787P mutations which produce a sequence of two consecutive PXXP motifs: CT sequences shown in  
197 Fig. 3A) revealed that deletion of CT led to increased receptor phosphorylation and activation of effector  
198 proteins under both unliganded and FGF7-stimulated conditions (Fig. 3A, FGFR2<sup>C1Δ34</sup>). The absence of  
199 CT in FGFR2<sup>C3</sup> promoted downstream signalling in both ERK1/2 (MAPK) and AKT pathways without  
200 ligand stimulation. This is likely to be due to the binding of the scaffold protein FRS2 which is known to  
201 bind to the JM and mediate downstream effector protein recruitment to the activated receptor (Fig. 3A)  
202 (32) (in contrast to FGFR1 to which FRS2 is constitutively bound; (33)). This result strongly suggests that  
203 the presence of CT controls FGFR2 kinase activity as well as inhibiting the interaction of FRS2 with the  
204 receptor.

205 We next investigated the direct effect of CT on the regulation of FGFR2 kinase activity using  
206 recombinant protein. Consistent with the cell-based assay (Fig. 3A), the phosphorylation of the A-loop  
207 increased as CT was truncated (KD-CT<sup>C3</sup> Fig. 3B). Thus, KD-CT<sup>C3</sup>, like  $KD^{PY1}$  which appeared in  
208 dynamic equilibrium between monomers and symmetric head-to-tail dimers (Fig. 2B, 2D and fig. S2E),  
209 behaved as a free enzyme (Fig. 1B). As expected, KD-CT<sup>C1</sup> had the lowest kinase activity but CT in KD-  
210 CT<sup>C1Δ34</sup> released inhibition as seen in our cell-based assay. However, KD-CT<sup>C2</sup>, which is of an identical  
211 length, but includes similar PXXP motifs as present in KD-CT<sup>C1</sup>, restored the inhibitory capability. This  
212 result suggests the importance of the PXXP motif(s) of CT in the inhibition of kinase activity.

### 213 A proline-rich motif on CT is required for the binding to KD

214 So far, our data indicate that when CT is present it inhibits the active intermediate receptor from  
215 progressing to the fully phosphorylated state. This was hypothesized to occur via two distinct mechanisms;  
216 1) antagonistically blocking receptor activation through direct binding to KD, and/or 2) through binding  
217 of CT to KD and/or JM to inhibit formation of asymmetric dimer.

218 CT<sup>C1</sup> bound to  $KD^{PY1}$  with a moderate affinity ( $K_d = 3.75 \pm 0.46 \mu M$ ; Fig. 3C). Although  $KD^{PY1}$  is  
219 potentially in the form of a dimer, the profile of the binding curves suggests that CT binds independently  
220 to the domain. NMR spectroscopy was used to probe the interaction surfaces of CT<sup>C1</sup>. To this end, CSPs  
221 of <sup>15</sup>N-labelled CT<sup>C1</sup> were measured on addition of  $KD^{PY1}$  (Fig. 3D). Two distinct potential interacting  
222 regions of CT<sup>C1</sup> were observed; residues around 765 to 780, including the known binding site for  
223 downstream effector proteins Y770 (Fig. 3D), and residues within the proline-rich motif in the C-terminus

224 (D802 to Y813; Fig. 3D). In a separate experiment CT<sup>C1</sup> was divided into two fragments: the first 24  
225 residues 765-788 (CT<sup>C1Δ34</sup>) and the last 23 residues 800-822 (CT<sup>L23</sup>). CT<sup>C1Δ34</sup> revealed negligible CSPs  
226 changes (fig. S3A and S3B) which supported our previous kinase assay data which showed that in the  
227 absence of the PXXP motifs this region does not affect kinase activity. More significant CSP changes  
228 from CT<sup>L23</sup> were observed (fig. S3C and S3D). We concluded that the last 23 residues containing the  
229 PXXP motifs are necessary for binding with the KD<sup>pY1</sup>, and this facilitates subsequent engagement of the  
230 first 24 residues of CT<sup>C1</sup>. CSP and affinity measurements of peptide fragments of CT revealed that the  
231 tightest binding sequence was <sup>801</sup>PDPMPYEPCLPQYPH<sup>815</sup> ( $K_d = 25.9 \pm 5.4 \mu\text{M}$ ; table S1 and fig. S3E).  
232 Our NMR experiments confirm that although a potentially extensive interface is involved, the PXXP  
233 motifs are required for CT<sup>C1</sup> to interact with the active intermediate KD<sup>pY1</sup> and hence inhibit kinase  
234 activity.

235 The importance of individual proline residues within the PXXP motif in binding to KD<sup>pY1</sup> was  
236 investigated using an *in vitro* GST pulldown assay with both the GST-tagged CT<sup>C1</sup> and CT<sup>C2</sup> (Fig. 3E).  
237 Binding was significantly reduced in the presence of proline to alanine point mutations except for P801A  
238 and P814A. The mutation of both P803 and D802 had a large impact on binding. Supported by our kinase  
239 assay and NMR data, we found that GST-CT<sup>C2</sup> bound to KD<sup>pY1</sup> whilst the first 24 amino acids (GST-  
240 CT<sup>C1Δ34</sup>) of C1 did not. The similarity of CT<sup>C2</sup> with the wild type CT<sup>C1</sup> was also apparent in the kinase  
241 phosphorylation data (Fig. 3B). Sequence alignment suggests that the interactions are strongest when the  
242 sequence includes a PXEPXXPXYP motif (where X is any residue) which occurs between residues 805  
243 and 814 for CT<sup>C1</sup> and 776 and 785 for CT<sup>C2</sup>.

244 Point mutations in FGFR2<sup>C1</sup> PDPMPXEPXXPXYP sequence confirmed the importance of this region  
245 for signaling in HEK293T cells (Fig. 3F). Even in the absence of FGF7 the corruption of the proline-rich  
246 sequence had a dramatic affect in up-regulation of FGFR2 and its downstream ERK1/2 signalling.  
247 Inhibition of recombinant KD by incubating peptides derived from CT<sup>L23</sup> identified <sup>808</sup>PCLPQYPH<sup>815</sup> as  
248 the minimum sequence of CT required for KD down-regulation (Fig. 3G and table S1 for sequences).

### 249 **The CT-KD interface includes regions associated with kinase activity**

250 Having established a detailed knowledge of the residues from CT that interact with KD<sup>pY1</sup>, we also  
251 measured CSP data for <sup>15</sup>N-labelled KD<sup>pY1</sup> on addition of CT. (Fig. 4A). Mapping the perturbed residues  
252 onto the crystal structure (Fig. 4B) revealed four clusters of residues in the KD<sup>pY1</sup> that showed significant  
253 shifts: 470-490 at the very N-terminal end of the N-lobe (including the nucleotide binding loop); 515-525  
254 (including the regulatory  $\alpha\text{C}$  helix); 590-610 (including the kinase insert), and 710-740 at the very C-  
255 terminal end of the C-lobe. The interface between CT<sup>C1</sup> and KD<sup>pY1</sup> is therefore extensive and covers  
256 regions associated with kinase activity providing a rationale for the inhibitory nature of the direct  
257 interaction. Comparing CSPs for binding of JM to KD<sup>pY1</sup> (Fig. 1F) and CT to KD<sup>pY1</sup> (Fig. 4A) suggests  
258 that there is some overlap, although residues with the largest CSPs are not entirely coincident. We  
259 performed HSQC titration of JM with <sup>15</sup>N-labelled KD<sup>pY1</sup> and recorded the CSPs for residues in regions  
260 previously seen to interact with JM on KD<sup>pY1</sup> (464V, 466E, and 467F at the N-terminal lobe and 530S and  
261 532L on the  $\alpha\text{C}$  helix: fig. S4A, left panels). Subsequent titration of CT to the preformed JM-KD complex  
262 resulted in negligible CSP effects on the JM-bound KD<sup>pY1</sup> spectra (fig. S4A, right panels) underscoring  
263 that binding of CT does not compete directly with JM for binding to KD<sup>pY1</sup>.

### 264 **CT inhibits asymmetric dimerization of JM-KD<sup>pY1</sup>**

265 When JM is present with KD<sup>pY1</sup> an asymmetric dimer forms which can promote further kinase activity.  
266 Conversely the presence of CT with KD inhibits this activity. We therefore sought to understand how  
267 these opposing control mechanisms combine to regulate further activity of KD<sup>pY1</sup>. Using size exclusion

268 chromatography, we showed that CT was able to block dimer formation when included as part of  $KD^{pY1}$ -  
269 CT (Fig. 5A). GST-CT<sup>C1</sup> was able to pull down (Fig. 5B) and form a high affinity complex with JM-  
270  $KD^{pY1}$  (SPR,  $K_d = 165.2 \pm 1.6$  nM; MST,  $K_d = 304 \pm 44$  nM: table S1, Fig. 3C and fig. S5B respectively).  
271 The binding of CT to JM- $KD^{pY1}$  was able to disrupt the asymmetric dimerization of the construct, as  
272 demonstrated using steady-state fluorescence resonance energy transfer (FRET) measurement (fig. S5A).  
273 Increasing the phosphorylation state of KD reduced the affinity of CT (fig. S5B). CT can bind to the non-  
274 phosphorylated JM- $KD^{Y657/658F}$  but with reduced affinity ( $K_d = 5.65 \pm 1.9$   $\mu$ M; table S1). It is notable that  
275 since the binding of CT to JM- $KD^{pY1}$  disrupts the asymmetric dimerization of the latter, the resulting high  
276 affinity complex has molecular ratio CT:JM- $KD^{pY1}$  of 1:1.

277 To confirm the impact of the CT on dimer formation in cells we used fluorescence lifetime imaging  
278 microscopy (FLIM) in serum starved HEK293T cells co-expressing CFP- and RFP-tagged FGFR2<sup>C1</sup>,  
279 FGFR2<sup>C2</sup> and FGFR2<sup>C3</sup>. Compared to the control (FGFR2<sup>C1</sup> with RFP) we saw increasingly shorter  
280 lifetimes in the populations of C2 and C3 receptors respectively, indicating that, in the absence of growth  
281 factor, dimerization increases in response to reduction in the size of CT (Fig. 5C). Interestingly the C3  
282 isoform appears to be extensively membrane localized suggesting that recycling of the receptor was  
283 impaired (zoomed inset panels Fig. 5C). Together our data indicate that the binding of CT to active  
284 intermediate  $KD^{pY1}$  counters the positive impact of JM on RTK phosphorylation in the absence of stimuli  
285 by simultaneously binding to regions of KD inhibiting enzyme activity as well as restricting formation of  
286 the asymmetric dimer, i.e. involving both mechanisms hypothesised earlier.

### 287 **CT binds independently to JM**

288 We have shown that CT binds more tightly in a 1:1 complex to JM- $KD^{pY1}$  than to  $KD^{pY1}$  alone (Fig. 3C).  
289 We have also demonstrated that, although JM acts to sustain the asymmetric dimer and hence enhance  
290 activity, only the N-terminal residues of JM are involved in the intermolecular latch interaction. Thus, CT  
291 might be capable of binding to both  $KD^{pY1}$  and JM. To investigate a direct intramolecular interaction  
292 between JM and CT we first showed that binding of JM- $KD^{pY1}$  to both CT<sup>C1</sup> and CT<sup>C2</sup> was reduced as JM  
293 was truncated (Fig. 5D and 5E respectively). Since stoichiometry of the final complex formed in each case  
294 is 1:1, the self-associated state of the JM- $KD^{pY1}$  interactant should not produce the observed changes in  
295 binding. Interaction with CT was much reduced on deletion of residues 429 to 449 which are outside the  
296 region previously shown to bind to KD. Thus, it would be possible under certain conditions (e.g. within  
297 the context of the ligand bound full length receptor) that JM could maintain the latch interaction whilst  
298 simultaneously binding to CT. This suggests that CT has two independent modes of binding involved in  
299 RTK regulation: 1) binding to  $KD^{pY1}$  and inhibiting activity and dimerization, and 2) binding to JM  
300 without affecting latch formation. These modes will have distinct function, are mutually exclusive and  
301 occur at different time points in receptor up-regulation.

302 Using four mono-phosphorylated constructs;  $KD^{pY1}$ , JM- $KD^{pY1}$ ,  $KD^{pY1}$ -CT<sup>C1</sup>, and JM- $KD^{pY1}$ -CT<sup>C1</sup> in  
303 a pull-down assay with GST-CT<sup>C1</sup>, we showed that CT<sup>C1</sup> binds independently to JM- $KD^{pY1}$ . However,  
304 when CT was included as part of the construct in both  $KD^{pY1}$ -CT<sup>C1</sup> and JM- $KD^{pY1}$ -CT<sup>C1</sup> binding was  
305 abrogated (Fig. 5F). Thus, our data demonstrate that CT binds to JM- $KD^{pY1}$  through an intramolecular  
306 interaction, since including CT on the construct disrupts dimerization and blocks GST-CT binding. We  
307 know that CT forms an extensive intramolecular interface with  $KD^{pY1}$  which stabilizes the monomeric  
308 protomer. This interface includes residues across the extent of the entire tail region (Fig. 3D). We have  
309 also shown that the presence of JM enhances the interaction with CT. Incubation of the same  $KD^{pY1}$ , JM-  
310  $KD^{pY1}$ ,  $KD^{pY1}$ -CT<sup>C1</sup>, and JM- $KD^{pY1}$ -CT<sup>C1</sup> with GST-JM showed that, consistent with previous  
311 observations, JM was able to bind to  $KD^{pY1}$  (Fig. 5G). JM also bound JM- $KD^{pY1}$ , which, although  
312 dimerized through one JM latch, has a free KD for independent JM binding. Significant binding of JM to



313  $KD^{pY1}$ -CT, but negligible binding of JM with the JM- $KD^{pY1}$ -CT<sup>C1</sup> construct was observed. These  
314 interactions of JM in the presence of CT could not occur if CT successfully competed with JM for binding  
315 to KD, but would require that JM can bind simultaneously with KD and CT. We measured direct binding  
316 between JM and CT ( $K_d = 20.2 \pm 2.92 \mu M$ ; table S1 and Fig. 5H). We also identified that the highest  
317 affinity sequence of JM that recognized CT includes residues <sup>429</sup>VTVSAESSSSMNSN<sup>442</sup> (fig. S6A and  
318 table S1). Thus, the binding site on JM for CT is non-overlapping and C-terminal to the consensus  
319 sequence of JM that we showed is required for forming the intermolecular latch to  $KD^{pY1}$ , i.e.  
320 <sup>414</sup>PAVHKL<sup>420</sup>, however it includes the VT site (including residues V429 and T430; the VT motif) (34)  
321 for FRS2 recruitment on growth factor binding. These data rationalize our previous cell-based observation  
322 that the presence of CT prevents FRS2 phosphorylation by FGFR2 under stimulated conditions (Fig. 3A).

323 To map the interaction between JM onto CT<sup>C1</sup> we titrated unlabelled JM into <sup>15</sup>N-labelled CT<sup>C1</sup>. The  
324 binding site can be seen to incorporate residues between V798 and S819 of CT which contains the proline-  
325 rich motif (Fig. 5I). Using a series of short peptides derived from CT we demonstrated that the proline-  
326 rich sequence from CT binds to JM (table S1 and fig. 6b), and the <sup>808</sup>PCLPQYPH<sup>815</sup> sequence is necessary  
327 for CT to bind to JM. Importantly, this is the same sequence that binds to both KD (Fig. 3) and to the  
328 GRB2 CSH3 domain (35). Thus, CT mediates three modes of receptor regulation.

329 The ability of CT to bind mutually exclusively to both KD and JM suggests that it can adopt two distinct  
330 conformations which have opposing impact on kinase activity, and which operate independently at  
331 different time points in the receptor up-regulation process. 1) Binding of CT to  $KD^{pY1}$  results in an  
332 intramolecular auto-inhibitory conformation which sustains the monomeric state of the mono-  
333 phosphorylated receptor. This is expected to control the active intermediate state in the absence of growth  
334 factor stimulation. 2) The CT of the enzyme-like KD flips from the inhibitory interaction with  $KD^{pY1}$ , to  
335 bind intramolecularly to the JM. In this state JM can simultaneously perform the role as the latch to the  
336 substrate-like KD of the asymmetric dimer. Thus, the CT is effectively isolated from blocking the kinase  
337 activity and receptor dissociation. Also in this state the CT of the substrate-like protomer is free to become  
338 phosphorylated. We propose that CT is stabilized in the latter of these two conformations when the  
339 receptor is bound to extracellular growth factor. The direct interaction between two peripheral regions  
340 thus adds a level of control to the kinase output not previously observed for RTKs.

### 341 **KD can exist in equilibrium between Grb2-bound and CT-bound active intermediate states**

342 Previously we have shown that in the absence of growth factor FGFR2 binds to the C-terminal SH3  
343 domain of dimeric GRB2 through the proline-rich sequence on CT (<sup>808</sup>PCLPQYPH<sup>814</sup>) and maintains  
344 FGFR2 in an active intermediate, signalling incompetent heterotetrameric state (4, 36). Since we have  
345 shown that the proline-rich sequence binds intramolecularly to JM- $KD^{pY1}$ , the ability of CT to regulate the  
346 active intermediate state is manifold. To assess whether these interactions are mutually exclusive, we first  
347 performed a pulldown assay using GST-CT which was incubated with GRB2. Subsequent addition of  
348 increasing concentrations of JM- $KD^{pY1}$  gradually decreased the amount of GRB2 precipitated, suggesting  
349 JM- $KD^{pY1}$  competes with GRB2 for the binding site on CT (fig. S6C). Based on the respective measured  
350 affinities, it is assumed that CT was binding to KD rather than JM in this experiment. CT was then  
351 immobilized on biolayer interferometry (BLI) sensors to probe the competitive interactions of JM- $KD^{pY1}$   
352 and GRB2. Binding of JM- $KD^{pY1}$  or GRB2 alone to the immobilized CT showed the expected different  
353 interaction properties associated with the size of the added proteins (fig. S6D) however, the addition of  
354 both JM- $KD^{pY1}$  and GRB2 simultaneously gives an identical response to that of adding only JM- $KD^{pY1}$   
355 to immobilized CT (fig. S6D), suggesting that GRB2 competes less efficiently with JM- $KD^{pY1}$ . Sequential  
356 binding of JM- $KD^{pY1}$  and GRB2 to the immobilized CT (fig. S6E) also indicated that, once CT is saturated  
357 with JM- $KD^{pY1}$ , GRB2 cannot compete it off. Interestingly, application of JM- $KD^{pY1}$  to GRB2-saturated

358 CT sensor resulted in a decrease of the binding signal followed by an increase of interaction signal as the  
359 JM-KD<sup>pY1</sup> displaces GRB2 on the immobilized CT (fig. S6F). Thus, equilibrium between CT bound to  
360 GRB2 and CT bound to JM-KD<sup>pY1</sup> exists but the respective affinities and the intramolecular nature of  
361 interaction strongly favours the latter.

### 362 **JM and CT regions combine to regulate kinase activity**

363 Having demonstrated the positive and negative impacts of JM and CT binding on regulation of KD<sup>pY1</sup>  
364 respectively, we examined how the presence of these peripheral regions control FGFR2 signalling. The  
365 following constructs, KD<sup>pY1</sup>; JM-KD<sup>pY1</sup>; KD<sup>pY1</sup>-CT<sup>C1</sup>; and JM-KD<sup>pY1</sup>-CT<sup>C1</sup> were used in an assay with  
366 the kinase dead JM-KD<sup>K518L</sup>-CT as a substrate (Fig. 6A). The activity is slightly enhanced by the presence  
367 of JM in JM-KD<sup>pY1</sup> compared to KD<sup>pY1</sup>. This is consistent with JM stabilizing the active asymmetric  
368 dimer. Conversely, the presence of CT in KD<sup>pY1</sup>-CT<sup>C1</sup> dramatically inhibits kinase activity through  
369 previously observed direct interaction with KD and resulting inhibition of dimerization. The presence of  
370 JM and CT in JM-KD<sup>pY1</sup>-CT<sup>C1</sup> shows medium activity. This underscores the regulatory role of the  
371 interplay between the two peripheral regions of the receptor in sustaining the active intermediate state  
372 through modulation of kinase activity. These data mirror the experiments on the constitutively active  
373 truncated K-sam FGFR2 isoforms, where the absence of CT leads to dysregulation of the intact receptor  
374 (Fig. 3A).

375 As the receptor becomes progressively phosphorylated the interaction of CT to KD needs to be down-  
376 regulated to enable access of downstream signalling proteins. We used a pull down experiment to reveal  
377 the mechanism for this release. GST-CT which was phosphorylated on its available tyrosine residues,  
378 pCT<sup>C1</sup>, was unable to pulldown JM-KD as it became progressively phosphorylated, i.e. JM-KD<sup>pY1</sup> to JM-  
379 KD<sup>pY6</sup> (Fig. 6B) Thus, as the receptor pY load increases, the phosphorylated CT is less able to bind  
380 intramolecularly, making it available for recruitment of downstream effector proteins.

381 We have shown that residues in JM sequence 429 to 449 play a role in interacting with CT (Fig. 5D),  
382 and hence the presence of CT would occlude the <sup>429</sup>VT<sup>430</sup> binding motif (34) for the FRS2 phosphotyrosine  
383 binding domain (PTB) in the absence of stimulation and prevent aberrant signalling. Therefore, the  
384 absence of CT in the C3 isoform should allow unrestricted recruitment of FRS2 leading to prolonged  
385 phosphorylation even at the unliganded state (as seen in Fig. 3A). This inhibition of access of FRS2 to JM  
386 by CT was demonstrated where significantly less JM-KD<sup>pY1</sup>-CT<sup>C1</sup> was precipitated compared to JM-  
387 KD<sup>pY1</sup>-CT<sup>C3</sup> in a pull down assay using GST-FRS2 PTB domain (Fig. 6C). JM-KD<sup>pY1</sup>-CT<sup>C2</sup> showed an  
388 intermediate level of interaction consistent with the proline-rich motif present in this isoform binds with  
389 lower affinity to the FRS2 cognate site. We also measured different FGFR2 isomers binding to FRS2  
390 using BLI. In the absence of the intact CT (C3 isoform) a significantly increased amount of FGFR2 protein  
391 bound to the PTB domain compared with the C1 and C2 isoforms (Fig. 6D).

392 Using an *in vitro* kinase assay we were able to demonstrate that the phosphorylation of FRS2 by FGFR2  
393 is affected by CT in the different isoforms. Immunoblotting showed that the C3 isoform has the highest  
394 kinase activity toward FRS2, whereas the C1 isoform has the lowest (Fig. 6E). This further suggested that  
395 CT<sup>C1</sup> isoform can interact with JM which contains the <sup>429</sup>VT<sup>430</sup> motif, and inhibit the recruitment and  
396 phosphorylation of FRS2 in the active intermediate state. This observation explains why the C3 isoform  
397 has higher FRS2-mediated downstream signalling activity and exhibits uncontrolled activation leading to  
398 oncogenic outcome in the active intermediate state.

### 399 **General importance of proline-rich motifs in RTK regulation**

400 Having shown that proline-rich motifs are critical in regulatory interactions with JM and KD, and the  
401 mutations on proline residues affect FGFR2 kinase activity and downstream signalling, we investigated  
402 whether mutation/truncation of proline-rich motifs within CTs of other RTKs are found in cancers in  
403 general. Humans have 58 identified RTKs, which fall into twenty subfamilies (10) of which 49 have  
404 proline residues on their CTs. Apart from providing protein recruitment sites for SH3/WW domains, the  
405 importance of proline-rich motifs in RTK signalling has not been investigated. Genomic data from cancer  
406 patient samples available on cBioPortal for Cancer Genomics ([www.cbioportal.org](http://www.cbioportal.org)) shows that of the 49  
407 RTKs, 40 have been identified with proline residue point mutations or deletions of proline-containing CT  
408 sequences (table S4). This suggests an important role for proline-containing sequences and raises their  
409 importance in regulation, particularly during the non-stimulated, active intermediate state we present here.

## 410 Discussion

411 RTKs generally cycle through a series of states on going from the dephosphorylated monomeric state to  
412 the fully phosphorylated, signalling-competent state. We have investigated a series of snapshots of  
413 structural states which show possible interactions and juxtapositioning of the various components. Linking  
414 of these snapshots into an animated series permits a full understanding of the progression of events and  
415 how each one provokes the next. Our data have highlighted RTKs in the mono-phosphorylated active  
416 intermediate JM-KD<sup>P<sup>Y1</sup></sup>-CT state as the most important frame in the animation of the progress from  
417 inactive to signalling receptor. This state represents a major check-point because the KD is active, but  
418 signal transduction is inhibited. Our observations show how, in this state, the receptor is highly regulated  
419 by the interactions of JM and the proline-rich motif on CT in the absence of stimulation, whilst being  
420 primed for full activation on growth factor binding.

421 Our mechanistic model starts with the dephosphorylated, inactive monomeric state, and progresses via  
422 the mono-phosphorylated active intermediate, through to the fully active state (Fig. 6F). Under basal  
423 conditions growth factor receptors diffuse through the plasma membrane (Fig. 6F i). Random collision  
424 leads to transmembrane-mediated self-association. This can lead to as much as 20% dimer and subsequent  
425 A-loop tyrosine phosphorylation of FGFR2 in the absence of ligand (3). Binding of GRB2 stabilizes  
426 FGFR2 dimers in the active intermediate state and inhibits further phosphorylation (4) (Fig. 6F ii). The  
427 presence of GRB2 on CT of FGFR2 is perturbed by a cycle of phosphorylation by the receptor and  
428 subsequent dephosphorylation by SHP2 phosphatase (4, 36). Without the inhibitory function of GRB2,  
429 the dysregulated active intermediate receptor could progress to full activation through the formation of  
430 asymmetric dimer mediated by JM. This would leave receptor activation in a precarious position without  
431 an additional mechanism restrict further kinase activity. Our observations demonstrate that this  
432 mechanism involves the intramolecular binding of CT to JM-KD<sup>P<sup>Y1</sup></sup> (Fig. 3C). This interaction is mutually  
433 exclusive of binding of GRB2 (fig. S6C to S6F and Fig. 6F iii). The presence of CT inhibits further  
434 phosphorylation by inhibiting catalytic activity and asymmetric dimerization. Thus, the mono-  
435 phosphorylated state, which is the check-point prior to full receptor activation, is tightly regulated either  
436 by the binding of GRB2 or the interaction with CT.

437 When cells are exposed to extracellular stimulation, JM of one protomer in the dimer latches onto KD  
438 of the other (Fig. 6f iv). In this way the former becomes the designated enzyme-like receptor, whilst the  
439 latter becomes the substrate-like receptor, both being held in a moderate affinity, dimeric conformation.  
440 Since the KD is already in its mono-phosphorylated state it is available for JM binding and adoption of  
441 the asymmetric dimer conformation. JM appears to inhibit the direct interaction between KDs and promote  
442 dynamic interlocution between the active domains in an asymmetric dimer (Fig. 2C). It also juxtaposes  
443 KDs within the asymmetric dimer to prevent progressive oligomerization of the domains (i.e. ‘daisy chain’  
444 formation (18, 37)) allowing only dimers to form.

445 The unrestricted activity of the enzyme-like receptor requires that CT is not able to bind to, and hence  
446 down-regulate KD of this protomer. This state is achieved through the intramolecular binding of CT to  
447 the available site on JM. Thus, the role of CT is multi-faceted and functions through independent  
448 interactions with GRB2, KD and JM. Truncation of CT up-regulates the kinase (Fig. 3A and 3B) and  
449 hence provides a rationale for the elevated proliferative signalling as we seen in the oncogenic *Ksam*  
450 deletions (fig. S6G).

451 The release of negative control by CT promotes an increase in KD phosphorylation which weakens  
452 dimerization (Fig. 2A), enhancing the dynamic interplay between protomers permitting easier access to  
453 tyrosine sites and alternation of the enzyme-like and substrate-like states between the molecules.  
454 Increasing phosphorylation of KD also results in progressive weakening of interactions with the peripheral  
455 regions ultimately leading to kinase dimer dissociation, leaving the receptor in a highly phosphorylated  
456 state whereby it can recruit downstream effector proteins (Fig. 6F v). Dissociation of phosphorylated  
457 FGFR2 also leaves it exposed to phosphatase activity which ultimately returns it to its initial  
458 unphosphorylated state (Fig. 6F i). Clearly the controlled activation cycle of FGFR2 would be affected by  
459 the impact of additional factors such as endocytosis (33), fluctuations in GRB2 concentration (38) and  
460 phosphatase concentration (36). However, the importance of both peripheral regions in influencing the  
461 self-association, and the dimeric conformation underscores how the receptor is tightly regulated to avoid  
462 aberrant signalling during the progression from unphosphorylated inactive form to fully phosphorylated  
463 active form.

464 Different RTKs include features that enable idiosyncratic regulation and commitment to defined  
465 downstream outcomes. The presence of peripheral regions on the majority of RTKs suggests that these  
466 can play common roles. In particular, the prevalence of proline-containing sequences in CTs. The impact  
467 on kinase-driven pathology of their mutation/truncation highlights the regulatory importance of these  
468 sequences. Mutations within, or deletions of proline-rich sequences in CTs of many RTKs (including  
469 IGF1R, FGFR2, ERBB2, ERBB3, ERBB4 and ROR2) are associated with range of cancers (27–29) (table  
470 S4). We hypothesise therefore that, since these sequences are found in the majority of RTKs, their  
471 interaction with KD and/or JM is a common feature of RTK regulation. Our data show, in the case of the  
472 *K-samII* truncations, that when these regulatory features are perturbed pathogenicity can result in  
473 uncontrolled cellular signalling. Thus, understanding of the roles of the peripheral region interactions will  
474 suggest alternative routes for therapeutic intervention outside the currently well-trodden path of inhibition  
475 of kinase activity.

## 476 **Materials and Methods**

### 477 **Cell culture**

478 HEK293T cells were maintained in DMEM (Dulbecco's modified Eagle's high glucose medium)  
479 supplemented with 10% (v/v) FBS (foetal bovine serum) and 1% antibiotic/antimycotic (Lonza) in a  
480 humidified incubator with 10% CO<sub>2</sub>.

### 481 **Protein expression and purification**

482 All MBP-tagged, GST-tagged and 6xHistidine-tagged fusion proteins were expressed and purified from  
483 BL21(DE3) cells. A single colony was used to inoculate 100 mL of LB which was grown overnight at  
484 37°C. 1L of LB was inoculated with 10 mL of the overnight culture and allowed to grow at 37°C until the  
485 OD<sub>600</sub> reaches 0.8 at which point the culture was cooled down to 20°C. Expression was then induced with  
486 0.5 mM IPTG and the culture was grown for a further 12 hours before harvesting by centrifugation. Cells  
487 were re-suspended in 20 mM Tris, 150 mM NaCl, 10% glycerol, pH 8.0 in the presence of protease



488 inhibitors and lysed by sonication. Insoluble material was removed by centrifugation (40,000g at 4°C for  
489 60 min). The soluble fraction was applied to an appropriate affinity column (Amylose column for MBP-  
490 tagged proteins, GST column for GST-tagged proteins and Talon column for His-tagged proteins).  
491 Following a wash with 10 times column volume of wash buffer (20 mM Tris, 150 mM NaCl, pH 8.0), the  
492 protein was eluted from the column with elution buffer (the washing buffer supplemented with 20mM  
493 maltose for the MBP-tagged proteins; a supplement of 20mM reduced glutathione for the GST-tagged  
494 proteins; a supplement of 150mM imidazole for the 6xHis-tagged proteins) and was concentrated to 5 mL  
495 and applied to a Superdex 75 gel filtration column equilibrated in a buffer containing 20 mM HEPES, 150  
496 mM NaCl and 1 mM TCEP pH 7.5. Analysis for protein purities by SDS-PAGE showed greater than 98%  
497 purity. For CT (CT<sup>C1</sup> and CT<sup>C1Δ34</sup>, GST-tagged) production and JM-KD<sup>PY1</sup>-CT<sup>C1</sup> (for crystallography,  
498 6xHis-tagged), 1 unit of thrombin (Sigma T6884) was used to cleave 1mg of recombinant proteins at 4°C  
499 for overnight. After cleavage, Benzamidine Sepharose 4 Fast Flow beads (GE) were used to remove  
500 thrombin. GST-Tag/His-Tag and uncut proteins were removed by passing protein solution through a GST  
501 or Talon column. Expression of <sup>15</sup>N-labelled proteins for NMR titrations and <sup>2</sup>H, <sup>15</sup>N, <sup>13</sup>C-labelled protein  
502 for backbone resonance assignment was done as previously described(39). For expression in 100% D<sub>2</sub>O,  
503 this procedure was modified by pre-growing the culture in a small volume of 100% D<sub>2</sub>O prior to  
504 expression over 20 hours.

## 505 **Nuclear magnetic resonance (NMR) spectroscopy**

### 506 *General information*

507 All NMR spectroscopic experiments concerning KD backbone assignment were carried out on Bruker  
508 Avance III 950 MHz NMR spectrometers equipped with cryogenically cooled triple resonance probes  
509 (5mm TXO or 3mm TCI). Titration experiments were additionally carried on Bruker Avance III 750 MHz  
510 NMR spectrometer, equipped with <sup>1</sup>H-optimized triple resonance NMR 5mm TCI-cryoprobe. NMR data  
511 was processed using NMRPipe and further analyzed with CcpNmr Analysis software package available  
512 locally and on NMRBox platform. Chemical shift perturbations (CSPs) were calculated from the chemical  
513 shifts of backbone amide <sup>1</sup>H ( $\Delta\omega_H$ ) and <sup>15</sup>N ( $\Delta\omega_N$ ) using the following equation:  $CSP =$   
514  $\sqrt{\Delta\omega_H^2 + (0.154\Delta\omega_N^2)}$ .

### 515 *KD and CT backbone assignment*

516 In order to obtain backbone assignment of KD and CT, both proteins were expressed in isotopically  
517 labeled media as described above. Set of KD samples uniformly <sup>13</sup>C-<sup>15</sup>N labeled and fully or partially  
518 (70%) deuteriated (<sup>2</sup>H) as well as uniformly <sup>13</sup>C-<sup>15</sup>N-labeled CT were prepared. Spectra were recorded at  
519 25°C with KD concentrations ranging from 200 μM to 600 μM in a HEPES buffer (20 mM HEPES, 150  
520 mM NaCl and 1 mM TCEP pH 7.5). Spectra of CT were recorded using 300 μM sample in the same  
521 HEPES buffer. Standard Bruker library together with BEST versions of amide transverse relaxation  
522 optimized spectroscopy (TROSY) of 3D backbone resonance assignment pulse sequences (HNCA,  
523 HNCOCA, HNCACB, CACBCONH, HNCO and HNCACO) were applied to collect high resolution  
524 spectra. In order to shorten acquisition time, Non-Uniform Sampling (20-30%) was routinely used.

### 525 *KD titration with CT and CT-derived fragments*

526 The NMR titration of uniformly <sup>15</sup>N-labeled KD with unlabelled CT and CT-derived peptides were  
527 recorded at 25°C using 100 μM KD sample in HEPES buffer. CT and CT-derived fragments were added  
528 at the 1:0.5, 1:1, 1:1.5, 1:2 and 1:1, 1:5, 1:10 molar ratios respectively and the amide spectra were recorded  
529 using BEST TROSY pulse sequence.

### 530 *CT titration with preform KD-JM complex*



531 The NMR titration of KD with JM peptide were recorded at 25°C using 250 µM uniformly <sup>15</sup>N-labeled  
532 sample in HEPES buffer. JM peptide was added at the 1:1, 1:2 and 1:3 molar ratios and the amide spectra  
533 recorded using BEST TROSY pulse sequence. To the fully titrated KD, peptide JM was added and the  
534 amide spectra (BEST TROSY) recorded at 1:1, 1:2, 1:3 molar ratios.

### 535 ***CT titration with KD***

536 The <sup>15</sup>N-labeled CT sample concentrated to 300 µM in HEPES buffer was titrated with unlabelled KD.  
537 Amide spectra were recorded at 25°C using hsqcetfpf3gpsi pulse sequence from Brüker library at 2:1, 1:1,  
538 1:2, 1:3, 1:4, 1:8 and 1:12 molar ratios.

### 539 **X-ray crystallography**

540 Crystals of JM-KD<sup>pY1</sup>-CT<sup>C1</sup> were obtained using the hanging-drop vapour diffusion method, mixing equal  
541 volumes of protein with reservoir solution and equilibrating over this reservoir at 20°C for 2 weeks. The  
542 reservoir solution contained 100 mM Tris, 160 mM TMAO, 20% PEG2000 at pH 8.6. For cryoprotection,  
543 crystals were transferred in the crystallization buffer supplemented by 20% Glycerol. X-ray diffraction  
544 data sets were collected from frozen single crystals at the Advanced Light Source (Berkeley, CA, USA,  
545 beamline 8.3.1) and processed with the program Elves. A molecular replacement solution was obtained  
546 using the BALBES molecular replacement pipeline and the crystal structure PDB code 2PSQ. Iterative  
547 model rebuilding and refinement was performed by using the program COOT, REFMAC5 and  
548 PDB\_REDO against the data set. Structural figures were made using PyMol.

### 549 **Small-Angle X-ray Scattering (SAXS)**

550 Data were collected for the mono-phosphorylated forms of KD<sup>pY1</sup> and JM-KD<sup>pY1</sup> on the SIBYLS beamline  
551 at the Advanced Light Source, Berkeley, USA at a wavelength of 1 Å. Every sample was exposed  
552 successively for 0.5, 1.0, and 6.0 s. Protein sample concentrations ranged from 1.0–10 mg/mL. Data for  
553 protein sample and buffer alone and were recorded at 10°C, and the buffer contribution was subtracted  
554 from the protein scattering data. Additional exploratory SAXS data were recorded at the SWING beamline  
555 (SOLEIL, Saint-Aubin, France) at  $\lambda = 1.03$  Å. Data were analysed using PRIMUS, GASBOR, DAMMIF,  
556 and DAMAVER from the ATSAS software package 1. Model SAXS patterns were calculated and fitted  
557 to data using FoXS 2. MultiFOXS was used to evaluate mixtures of monomers and dimers.

558 Swiss-Model was used to prepare a complete FGFR2 KD<sup>pY1</sup> monomer (including loops and side chains  
559 missing in the crystallographic model) based on PDB 2PVF. Potential FGFR2 KD<sup>pY1</sup> dimers were based  
560 on arranging the completed monomer into dimer configurations found in crystal structures: PDB 2PSQ  
561 (symmetric head-tail dimer); 2PVF and 3CLY (asymmetric kinase C-terminal tail trans-phosphorylation);  
562 3GQI (asymmetric A-loop trans-phosphorylation of FGFR1). Additional dimers were derived from our  
563 FGFR2 KD<sup>pY1</sup> crystal structures (PDB 6V6Q). These crystals were formed by a combination of the  
564 symmetric head-tail dimers found in 2PSQ, as well as two other forms. In one, termed KI, contacts were  
565 established through the kinase insertion (KI) loop. In the other, termed N-C, the N-lobe of one kinase  
566 bound to the C-lobe of the other (See Supplementary Fig. 2d). 30 additional dimers were obtained using  
567 in silico docking with CLusPro2.0 (30 different docking results) based on monomeric KD. An ‘aggregate’  
568 was mimicked using a region of the crystal lattice that had a similar structure as DAMMIF ab initio models  
569 derived from SAXS data under conditions where KD was highly aggregated.

570 We arranged these models into three different ‘pools’ of structures from which best fitting multi-state  
571 models were subsequently computationally selected (using FoXS). Pool 1: all monomeric and dimeric  
572 models (44 models). Pool 2: monomer and only dimers found in our FGFR2<sup>pY1</sup> crystal structures (7  
573 models). Pool 3: As Pool 2, but also including trimers derived from our FGFR2<sup>pY1</sup> crystal lattices (9

574 models). For JM-KD<sup>pY1</sup> We prepared models similarly as for KD<sup>pY1</sup>, using crystal-derived and in silico  
575 docked dimeric and multimeric assemblies. Given that the long flexible JM region has a significant impact  
576 on the SAXS pattern, we typically used five different JM conformations for the monomer and crystal-  
577 lattice derived dimers, resulting in a pool of 55 different structures.

### 578 **Mutation of FGFR2 proteins**

579 Standard site-directed mutagenesis was carried out to mutate tyrosine residues into phenylalanine on KDs  
580 to mimic the sequential phosphorylation pattern of KD (KD<sup>pY1</sup> to KD<sup>pY6</sup>; see schematic Fig. 1D and  
581 Supplementary Fig. 2A. For the FGFR2 IIIb isoform this sequence is; pY657, pY587, pY467, pY589,  
582 pY658 and pY734, adapted from the IIIc isoform(30)). The same methods were also used to mutate proline  
583 residues on the C-terminal tail in this study.

### 584 ***In vitro* dephosphorylation and phosphorylation of purified proteins**

585 Calf Intestinal alkaline phosphatase (CIP, New England Biolabs) was conjugated on UltraLink Biosupport  
586 beads (Thermo Fisher Scientific). CIP-beads were mixed with purified protein solution and rotated gently  
587 at 4°C for overnight to remove phosphate group in solution. After dephosphorylation, protein solution and  
588 CIP-beads were separated by centrifugation. Dephosphorylation level was examined by western blotting.  
589 Purified FGFR2 proteins were phosphorylated by incubating with 5 mM ATP and 10 mM MgCl<sub>2</sub>. The  
590 phosphorylation reactions were quenched by adding EDTA (prepared in 10 mM HEPES, pH 7.5) to a final  
591 concentration of 100 mM. Proteins were analysed by SDS-PAGE and western blot to study the  
592 phosphorylation status.

### 593 **Transient cell transfection with plasmids**

594 30 min before transfection, cells were harvested and resuspended in antibiotic-free medium. Transfection  
595 was carried out using Metafectene (Biontex Cat#: T020) according to manufacturer manual.

### 596 **Cell signalling studies**

597 For mammalian cell studies, cells were starved for 16 hours, and left unstimulated or stimulated with  
598 10ng/ml FGF7 ligand (R&D Systems Cat#: 251-KG/CF) at 37°C. After stimulation, medium was removed  
599 and cells were put on ice and immediately lysed by scraping in ice-cold lysis buffer supplemented with  
600 protease inhibitor (Calbiochem) and phosphatase inhibitor (1 mM sodium orthovanadate (NaVO<sub>3</sub>), and  
601 10 mM sodium fluoride (NaF). Cells were cleared by centrifugation and the supernatants were subjected  
602 to immunoblotting using the BioRad protein electrophoresis system. The intact gel was transfer to PVDF  
603 membrane for probing with different antibodies. Phospho-protein blots were stripped with stripping buffer  
604 (Millipore) and re-probed with total protein antibodies. Antibodies were from: Anti-Phospho-FGF  
605 Receptor (Tyr653/654) Rabbit polyclonal, Cell Signaling Technology Cat#:3471; Anti-Phospho-FRS2- $\alpha$   
606 (Tyr436) Rabbit polyclonal, Cell Signaling Technology Cat#: 3861; Anti-Phospho-SHP-2 (Tyr542)  
607 Rabbit polyclonal, Cell Signaling Technology Cat#: 3751; Anti-Phospho-Akt (Thr308) Rabbit  
608 monoclonal, Cell Signaling Technology Cat#: 4056; Anti-Phospho-p44/42 MAPK (Erk1/2)  
609 (Thr202/Tyr204) Rabbit monoclonal, Cell Signaling Technology Cat#: 4370; Anti-p44/42 MAPK  
610 (Erk1/2) Rabbit monoclonal, Cell Signaling Technology Cat#: 4695; Anti-GRB2 Rabbit polyclonal, Cell  
611 Signaling Technology Cat#: 3972; Anti- $\alpha$ -Tubulin Rabbit polyclonal, Cell Signaling Technology Cat#:  
612 2144; Anti-GST Rabbit polyclonal, Cell Signaling Technology Cat#: 2622; Anti-FGFR2 Mouse  
613 monoclonal, Santa Cruz Biotechnology Cat#: sc-6930; Anti-Phospho-Tyr Mouse monoclonal, Santa Cruz  
614 Biotechnology Cat#: sc-7020; Anti-6xHis Mouse monoclonal, Takara Cat#: 631212.

### 615 **Pulldown and western blots**

616 For immunoblotting, proteins were separated by SDS-PAGE, transferred to PVDF membranes and  
617 incubated with the specific antibodies. Immune complexes were detected with horseradish peroxidase  
618 conjugated secondary antibodies and visualized by enhanced chemiluminescence reagent according to the  
619 manufacturer's instructions (Pierce). For pulldown experiments, 100ug of protein was prepared in 1 ml  
620 volume. MBP-tagged or GST-tagged proteins immobilized on Amylose beads (GE Healthcare Life  
621 Science) or Glutathione Sepharose (GE Healthcare Life Science) was added and incubated at 4°C  
622 overnight with gentle rotation. The beads were then spun down at 4,000 rpm for 3 minutes, supernatant  
623 was removed and the beads were washed with 1 ml lysis buffer. This washing procedure was repeated  
624 five times in order to remove non-specific binding. After the last wash, 50 µl of 2x Laemmli sample buffer  
625 were added, the sample was boiled and subjected to SDS-PAGE and western blot assays.

### 626 **Fluorescence resonance energy transfer (FRET)**

627 Recombinant GFP-JM-KD<sup>PY1</sup>-CT<sup>C1</sup> (donor) and RFP-JM-KD<sup>PY1</sup>-CT<sup>C1</sup> (acceptor) proteins (1µM) were  
628 used for *In vitro* steady-state FRET analysis. The changes of donor emission (510nm) upon dimer  
629 formation or dimer disruption upon the addition of CT were recorded at 25°C.

### 630 **Quantitative imaging FRET microscopy**

631 HEK293T cells 24 h after transfection were seeded onto coverslips and allowed to grow for a further 48  
632 h then fixed by addition of 4% (w/vol) paraformaldehyde, pH 8.0, 20 min. at room temperature. Cells  
633 were then washed six or seven times with PBS, pH 8.0 and mounted onto a slide with mounting medium  
634 (0.1% p-phenylenediamine/ 75% glycerol in PBS at pH 7.5 – 8.0) and curated for 3 - 4 h before imaging.  
635 FLIM images were captured using a Leica SP5 II confocal microscope. Atto488 was excited at 900 nm  
636 with titanium-sapphire pumped laser (Mai Tai BB, Spectral Physics) with 710 - 920nm tunability and 70  
637 femtosecond pulse width. Becker & Hickl (B&H) SPC830 data and image acquisition card was used for  
638 time-correlated single photon counting (TCSPC). Electrical time resolution 8 Pico seconds with a pixel  
639 resolution of 512 x 512. Data processing and analysis were done using B&H SPC FLIM analysis software.  
640 The fluorescence decays were fitted with a single exponential decay model.

### 641 **Microscale thermophoresis (MST)**

642 Binding affinities were measured using the Monolith NT.115 (NanoTemper Technologies, GmbH).  
643 Proteins were fluorescently labelled with Atto488 according to the manufacturer's protocol. Labelling  
644 efficiency was determined to be 1:1 (protein:dye) by measuring the absorbance at 280 and 488 nm. A 16  
645 step dilution series of the unlabelled binding partner was prepared and mixed with the labelled protein at  
646 1:1 ratio and loaded into capillaries. Measurements were performed at 25 °C in a buffer containing 20 mM  
647 HEPES, 150 mM NaCl, 1 mM TCEP and 0.01% Tween 20 at pH7.5. Data analysis was performed using  
648 Nanotemper Analysis software, v.1.2.101 and was plotted using Origin 7.0. All measurements were  
649 conducted as triplicates and the error bars were presented as the standard deviations of the triplicates. For  
650 the experiments employed to measure dimerization KD values are referred to a 'apparent' because, based  
651 on the differential concentrations, the fitting model assumes labelled are bound to unlabelled polypeptides.

### 652 **Surface plasmon resonance (SPR)**

653 SPR experiments were carried out using a BIAcore T100 instrument (GE Healthcare). CT<sup>C1</sup> were  
654 immobilized on CM4 chips according to the standard amine coupling protocol. Briefly, carboxymethyl  
655 groups on the chip surface were activated with a 1:1 mixture of N-ethyl-N-(dimethylaminopropyl)  
656 carbodiimide (EDC) and N-hydroxysuccinimide (NHS). Proteins were diluted in 20 mM HEPES, pH 6.5  
657 and injected over the activated chip surface. The unbound chip surface was blocked using ethanolamine.  
658 Proteins were immobilized to approximately 200 response units. Different concentrations of analytes were

659 injected over the immobilized chips at a flow rate of 30  $\mu$ l/min. The sensor surface was regenerated by  
660 injection of 30  $\mu$ l of 0.1% SDS and 60  $\mu$ l of 500 mM NaCl. Reference responses were subtracted from  
661 flow cells for each analyte injection using BiaEvaluation software. The resulting sensorgrams were  
662 analysed to determine the kinetic parameters. Raw data shows a rise in signal associated with binding  
663 followed by a diminished signal after application of wash buffer.

### 664 **Bio-layer interferometry (BLI)**

665 BLI experiments were performed using a FortéBio Octet Red 384 using Anti-GST sensors. Assays were  
666 done in 384 well plates at 25 °C. Association was measured by dipping sensors into solutions of analyte  
667 protein (FGFR2 proteins) for 125 seconds and was followed by moving sensors to wash buffer for 100  
668 seconds to monitor the dissociation process. Raw data shows a rise in signal associated with binding  
669 followed by a diminished signal after application of wash buffer.

### 670 **Peptides**

671 <sup>407</sup>Juxtamembrane region<sup>462</sup>, <sup>407</sup>KPDFSSQPAVHKL<sup>420</sup>, <sup>414</sup>PAVHKLTKRIPLRRQVT<sup>430</sup>,  
672 <sup>429</sup>VTVSAESSSSMNSN<sup>442</sup>, <sup>439</sup>MNSNTPLVRITTRL<sup>452</sup>, <sup>449</sup>TTRLSSTADTPMLA<sup>462</sup>, <sup>801</sup>PDPMPYEP<sup>808</sup>,  
673 <sup>801</sup>PDPMPYEPCLPQYPH<sup>815</sup>, <sup>808</sup>PCLPQYPHINGSVKT<sup>822</sup>, <sup>801</sup>PDPMPYEPCLPQYPH<sup>815</sup>,  
674 <sup>808</sup>PCLPQYPH<sup>815</sup>, <sup>808</sup>PCLPQYPHINGS<sup>819</sup>, <sup>815</sup>HINGSVKT<sup>822</sup>, <sup>804</sup>MPYEPCLP<sup>811</sup>. All peptides were  
675 purchase from Genscript.

676

677

### 678 **Supplementary Materials**

679 Fig. S1. The interaction of JM to KD.

680 Fig. S2. Dimerization of mono-phosphorylated kinase.

681 Fig. S3. CT<sup>C1</sup> fragments bind to KD<sup>P<sup>Y1</sup></sup>.

682 Fig. S4. Binding of CT does not compete with JM for binding to KD<sup>P<sup>Y1</sup></sup>.

683 Fig. S5. Phosphorylation states control KD and CT<sup>C1</sup> interaction.

684 Fig. S6. CT-JM interactions and CT competes with GRB2 for binding to JM-KD<sup>P<sup>Y1</sup></sup>.

685 Table S1. Biophysical measurements of FGFR2 JM, KD, and CT interactions.

686 Table S2. Statistic parameters of SAXS experiments for KD<sup>P<sup>Y1</sup></sup> and JM- KD<sup>P<sup>Y1</sup></sup>.

687 Table S3. X-ray data collection and refinement statistics.

688 Table S4. Proline mutants in RTK C-terminal tails and human cancers.

689

690

### 691 **Acknowledgments:**

692 We thank the Berkeley Laboratory Advanced Light Source and SIBYLS beamline staff at 12.3.1 for  
693 assistance with collection of SAXS data, and we acknowledge SOLEIL for provision of synchrotron  
694 radiation facilities (proposals nr. 20181104 and 20190107) and we would like to thank J. Perez and A.  
695 Thureau for assistance in using the beamline SWING. We thank Dr S. Arur (MD Anderson Cancer  
696 Center), Dr N. Forde (University of Leeds), and A. Stainthorp (University of Leeds) for helpful discussion  
697 and comments. We thank Dr A. Kalverda (The Astbury Structural Biology Laboratory, University of  
698 Leeds) for the help on NMR data collection and analysis.

### 699 **Funding:**

700 This work was funded in part by CRUK grant C57233/A22356 awarded to J.E.L. The research by S.T.A.  
701 supported by funding from King Abdullah University of Science and Technology (KAUST). Z.A. is



702 supported by National Institutes of Health (NIH) grant R01 CA200231 and Cancer Prevention Research  
703 Institute of Texas (CPRIT) grant RP180813.

#### 704 **Author contributions:**

705 C.-C.L. and J.E.L. designed the overall project and wrote the manuscript. C.-C.L. performed and analysed  
706 most of the experiments. L.W. assigned and analysed NMR data. K.M.S. contributed to data analysis and  
707 manuscript writing. S.T.A and G.P-M. performed the protein structural analysis and contributed to  
708 manuscript writing. Z.A. performed the FLIM experiments and data analysis.

#### 709 **Competing interests:**

710 The authors declare no competing financial interests.

#### 711 **Data and materials availability:**

712 The accession number for the coordinate and structure for the mono-phosphorylated FGFR2 kinase  
713 reported in this paper is PDB: 6V6Q.

714

715

716

#### 717 **References**

- 718 1. C. M. Furdui, E. D. Lew, J. Schlessinger, K. S. Anderson, Autophosphorylation of FGFR1 Kinase  
719 Is Mediated by a Sequential and Precisely Ordered Reaction. *Mol. Cell.* **21**, 711–717 (2006).
- 720 2. S. R. Hubbard, W. T. Miller, Receptor tyrosine kinases: mechanisms of activation and signaling.  
721 *Curr. Opin. Cell Biol.* (2007), , doi:10.1016/j.ceb.2007.02.010.
- 722 3. S. Sarabipour, K. Hristova, Mechanism of FGF receptor dimerization and activation. *Nat.*  
723 *Commun.* **7**, 10262 (2016).
- 724 4. C.-C. Lin, F. A. Melo, R. Ghosh, K. M. Suen, L. J. Stagg, J. Kirkpatrick, S. T. Arold, Z. Ahmed,  
725 J. E. Ladbury, Inhibition of Basal FGF Receptor Signaling by Dimeric Grb2. *Cell.* **149**, 1514–  
726 1524 (2012).
- 727 5. I. Maruyama, Mechanisms of Activation of Receptor Tyrosine Kinases: Monomers or Dimers.  
728 *Cells.* **3**, 304–330 (2014).
- 729 6. N. F. Endres, R. Das, A. W. Smith, A. Arkhipov, E. Kovacs, Y. Huang, J. G. Pelton, Y. Shan, D.  
730 E. Shaw, D. E. Wemmer, J. T. Groves, J. Kuriyan, Conformational Coupling across the Plasma  
731 Membrane in Activation of the EGF Receptor. *Cell.* **152**, 543–556 (2013).
- 732 7. O. A. Karpov, G. W. Fearnley, G. A. Smith, J. Kankanala, M. J. McPherson, D. C. Tomlinson, M.  
733 A. Harrison, S. Ponnambalam, Receptor tyrosine kinase structure and function in health and  
734 disease. *AIMS Biophys.* **2**, 476–502 (2015).
- 735 8. A. Östman, Regulation of receptor tyrosine kinase signaling by protein tyrosine phosphatases.  
736 *Trends Cell Biol.* **11**, 258–266 (2001).
- 737 9. X. Zhang, J. Gureasko, K. Shen, P. A. Cole, J. Kuriyan, An Allosteric Mechanism for Activation  
738 of the Kinase Domain of Epidermal Growth Factor Receptor. *Cell.* **125**, 1137–1149 (2006).
- 739 10. M. A. Lemmon, J. Schlessinger, Cell signaling by receptor tyrosine kinases. *Cell.* **141**, 1117–34  
740 (2010).
- 741 11. R. M. Baxter, J. P. Secrist, R. R. Vaillancourt, A. Kazlauskas, Full Activation of the Platelet-  
742 derived Growth Factor  $\beta$ -Receptor Kinase Involves Multiple Events. *J. Biol. Chem.* **273**, 17050–  
743 17055 (1998).
- 744 12. L. E. Wybenga-Groot, B. Baskin, S. H. Ong, J. Tong, T. Pawson, F. Sicheri, Structural Basis for



- 745 Autoinhibition of the EphB2 Receptor Tyrosine Kinase by the Unphosphorylated Juxtamembrane  
746 Region. *Cell*. **106**, 745–757 (2001).
- 747 13. R. Herbst, S. J. Burden, The juxtamembrane region of MuSK has a critical role in agrin-mediated  
748 signaling. *EMBO J*. **19**, 1167–1167 (2000).
- 749 14. J. H. Till, M. Becerra, A. Watty, Y. Lu, Y. Ma, T. A. Neubert, S. J. Burden, S. R. Hubbard,  
750 Crystal Structure of the MuSK Tyrosine Kinase. *Structure*. **10**, 1187–1196 (2002).
- 751 15. J. Griffith, J. Black, C. Faerman, L. Swenson, M. Wynn, F. Lu, J. Lippke, K. Saxena, The  
752 Structural Basis for Autoinhibition of FLT3 by the Juxtamembrane Domain. *Mol. Cell*. **13**, 169–  
753 178 (2004).
- 754 16. S. R. Hubbard, Juxtamembrane autoinhibition in receptor tyrosine kinases. *Nat. Rev. Mol. Cell*  
755 *Biol*. **5**, 464–471 (2004).
- 756 17. C. D. Mol, D. R. Dougan, T. R. Schneider, R. J. Skene, M. L. Kraus, D. N. Scheibe, G. P. Snell,  
757 H. Zou, B.-C. Sang, K. P. Wilson, Structural Basis for the Autoinhibition and STI-571 Inhibition  
758 of c-Kit Tyrosine Kinase. *J. Biol. Chem*. **279**, 31655–31663 (2004).
- 759 18. N. Jura, N. F. Endres, K. Engel, S. Deindl, R. Das, M. H. Lamers, D. E. Wemmer, X. Zhang, J.  
760 Kuriyan, Mechanism for activation of the EGF receptor catalytic domain by the juxtamembrane  
761 segment. *Cell*. **137**, 1293–307 (2009).
- 762 19. K. W. Thiel, G. Carpenter, Epidermal growth factor receptor juxtamembrane region regulates  
763 allosteric tyrosine kinase activation. *Proc. Natl. Acad. Sci*. **104**, 19238–19243 (2007).
- 764 20. L. M. Shewchuk, A. M. Hassell, B. Ellis, W. D. Holmes, R. Davis, E. L. Horne, S. H. Kadwell,  
765 D. D. McKee, J. T. Moore, Structure of the Tie2 RTK domain: self-inhibition by the nucleotide  
766 binding loop, activation loop, and C-terminal tail. *Structure*. **8**, 1105–13 (2000).
- 767 21. C. M. Chang, H. K. Shu, L. Ravi, R. J. Pelley, H. Shu, H. J. Kung, A minor tyrosine  
768 phosphorylation site located within the CAIN domain plays a critical role in regulating tissue-  
769 specific transformation by erbB kinase. *J. Virol*. **69**, 1172–80 (1995).
- 770 22. M. Landau, S. J. Fleishman, N. Ben-Tal, A Putative Mechanism for Downregulation of the  
771 Catalytic Activity of the EGF Receptor via Direct Contact between Its Kinase and C-Terminal  
772 Domains. *Structure*. **12**, 2265–2275 (2004).
- 773 23. E. R. Wood, A. T. Truesdale, O. B. McDonald, D. Yuan, A. Hassell, S. H. Dickerson, B. Ellis, C.  
774 Pennisi, E. Horne, K. Lackey, K. J. Alligood, D. W. Rusnak, T. M. Gilmer, L. Shewchuk, A  
775 Unique Structure for Epidermal Growth Factor Receptor Bound to GW572016 (Lapatinib).  
776 *Cancer Res*. **64**, 6652–6659 (2004).
- 777 24. K. S. Gajiwala, EGFR: Tale of the C-terminal tail. *Protein Sci*. **22**, 995–999 (2013).
- 778 25. T. Ueda, H. Sasaki, Y. Kuwahara, M. Nezu, T. Shibuya, H. Sakamoto, H. Ishii, K. Yanagihara, K.  
779 I. Mafune, M. Makuuchi, M. Terada, Deletion of the carboxyl-terminal exons of K-sam/FGFR2  
780 by short homology-mediated recombination, generating preferential expression of specific  
781 messenger RNAs. *Cancer Res*. **24**, 6080–6 (1999).
- 782 26. I. Bernard-Pierrot, D. Ricol, A. Cassidy, A. Graham, P. Elvin, A. Caillault, S. Lair, P. Broët, J.-P.  
783 Thiery, F. Radvanyi, Inhibition of human bladder tumour cell growth by fibroblast growth factor  
784 receptor 2b is independent of its kinase activity. Involvement of the carboxy-terminal region of  
785 the receptor. *Oncogene*. **23**, 9201–9211 (2004).
- 786 27. X. Li, Y. Hou, T. Shi, Y. He, D. Ren, Z. Song, S. Wei, G. Chen, J. Chen, S. Xu,  
787 Clinicopathological characteristics and genetic analysis of pulmonary carcinoid tumors: A  
788 single-center retrospective cohort study and literature review. *Oncol. Lett*. **19**, 2446–2456 (2020).
- 789 28. P. K.-S. Ng, J. Li, K. J. Jeong, S. Shao, H. Chen, Y. H. Tsang, S. Sengupta, Z. Wang, V. H.  
790 Bhavana, R. Tran, S. Soewito, D. C. Minussi, D. Moreno, K. Kong, T. Dogruluk, H. Lu, J. Gao,

- 791 C. Tokheim, D. C. Zhou, A. M. Johnson, J. Zeng, C. K. M. Ip, Z. Ju, M. Wester, S. Yu, Y. Li, C.  
792 P. Vellano, N. Schultz, R. Karchin, L. Ding, Y. Lu, L. W. T. Cheung, K. Chen, K. R. Shaw, F.  
793 Meric-Bernstam, K. L. Scott, S. Yi, N. Sahni, H. Liang, G. B. Mills, Systematic Functional  
794 Annotation of Somatic Mutations in Cancer. *Cancer Cell*. **33**, 450-462.e10 (2018).
- 795 29. I. Gudernova, L. Balek, M. Varecha, J. F. Kucerova, M. Kunova Bosakova, B. Fafilek, V.  
796 Palusova, S. Uldrijan, L. Trantirek, P. Krejci, Inhibitor repurposing reveals ALK, LTK, FGFR,  
797 RET and TRK kinases as the targets of AZD1480. *Oncotarget*. **8**, 109319–109331 (2017).
- 798 30. H. Chen, C. F. Xua, J. Ma, A. V. Eliseenkova, W. Li, P. M. Pollock, N. Pitteloud, W. T. Miller,  
799 T. A. Neubert, M. Mohammadi, A crystallographic snapshot of tyrosine trans-phosphorylation in  
800 action. *Proc. Natl. Acad. Sci. U. S. A.* (2008), doi:10.1073/pnas.0807752105.
- 801 31. J. H. Bae, J. Schlessinger, Asymmetric tyrosine kinase arrangements in activation or  
802 autophosphorylation of receptor tyrosine kinases. *Mol. Cells*. **29**, 443–448 (2010).
- 803 32. S. H. Ong, G. R. Guy, Y. R. Hadari, S. Laks, N. Gotoh, J. Schlessinger, I. Lax, FRS2 Proteins  
804 Recruit Intracellular Signaling Pathways by Binding to Diverse Targets on Fibroblast Growth  
805 Factor and Nerve Growth Factor Receptors. *Mol. Cell. Biol.* **20**, 979–989 (2000).
- 806 33. Z. Ahmed, A. C. Schüller, K. Suhling, C. Tregidgo, J. E. Ladbury, Extracellular point mutations  
807 in FGFR2 elicit unexpected changes in intracellular signalling. *Biochem. J.* **413**, 37–49 (2008).
- 808 34. H. R. Burgar, H. D. Burns, J. L. Elsdén, M. D. Lalioti, J. K. Heath, Association of the Signaling  
809 Adaptor FRS2 with Fibroblast Growth Factor Receptor 1 (Fgfr1) Is Mediated by Alternative  
810 Splicing of the Juxtamembrane Domain. *J. Biol. Chem.* **277**, 4018–4023 (2002).
- 811 35. Z. Ahmed, R. George, C.-C. Lin, K. M. Suen, J. A. Levitt, K. Suhling, J. E. Ladbury, Direct  
812 binding of Grb2 SH3 domain to FGFR2 regulates SHP2 function. *Cell. Signal.* **22**, 23–33 (2010).
- 813 36. Z. Ahmed, C.-C. Lin, K. M. Suen, F. A. Melo, J. A. Levitt, K. Suhling, J. E. Ladbury, Grb2  
814 controls phosphorylation of FGFR2 by inhibiting receptor kinase and Shp2 phosphatase activity.  
815 *J. Cell Biol.* **200**, 493–504 (2013).
- 816 37. K. S. Gajiwala, K. Maegley, R. A. Ferre, Y. A. He, X. Yu, Ack1: Activation and Regulation by  
817 Allosterity. *PLoS One* (2013), doi:10.1371/journal.pone.0053994.
- 818 38. Z. Timsah, Z. Ahmed, C.-C. Lin, F. A. Melo, L. J. Stagg, P. G. Leonard, P. Jeyabal, J. Berrout, R.  
819 G. O’Neil, M. Bogdanov, J. E. Ladbury, Competition between Grb2 and Plcγ1 for FGFR2  
820 regulates basal phospholipase activity and invasion. *Nat. Struct. Mol. Biol.* **21**, 180–188 (2014).
- 821 39. H. Chen, Z. Huang, K. Dutta, S. Blais, T. A. Neubert, X. Li, D. Cowburn, N. J. Traaseth, M.  
822 Mohammadi, Cracking the Molecular Origin of Intrinsic Tyrosine Kinase Activity through  
823 Analysis of Pathogenic Gain-of-Function Mutations. *Cell Rep.* **4**, 376–384 (2013).
- 824  
825  
826  
827  
828  
829  
830  
831  
832  
833  
834  
835  
836  
837

838 **Figures**

**Figure 1**

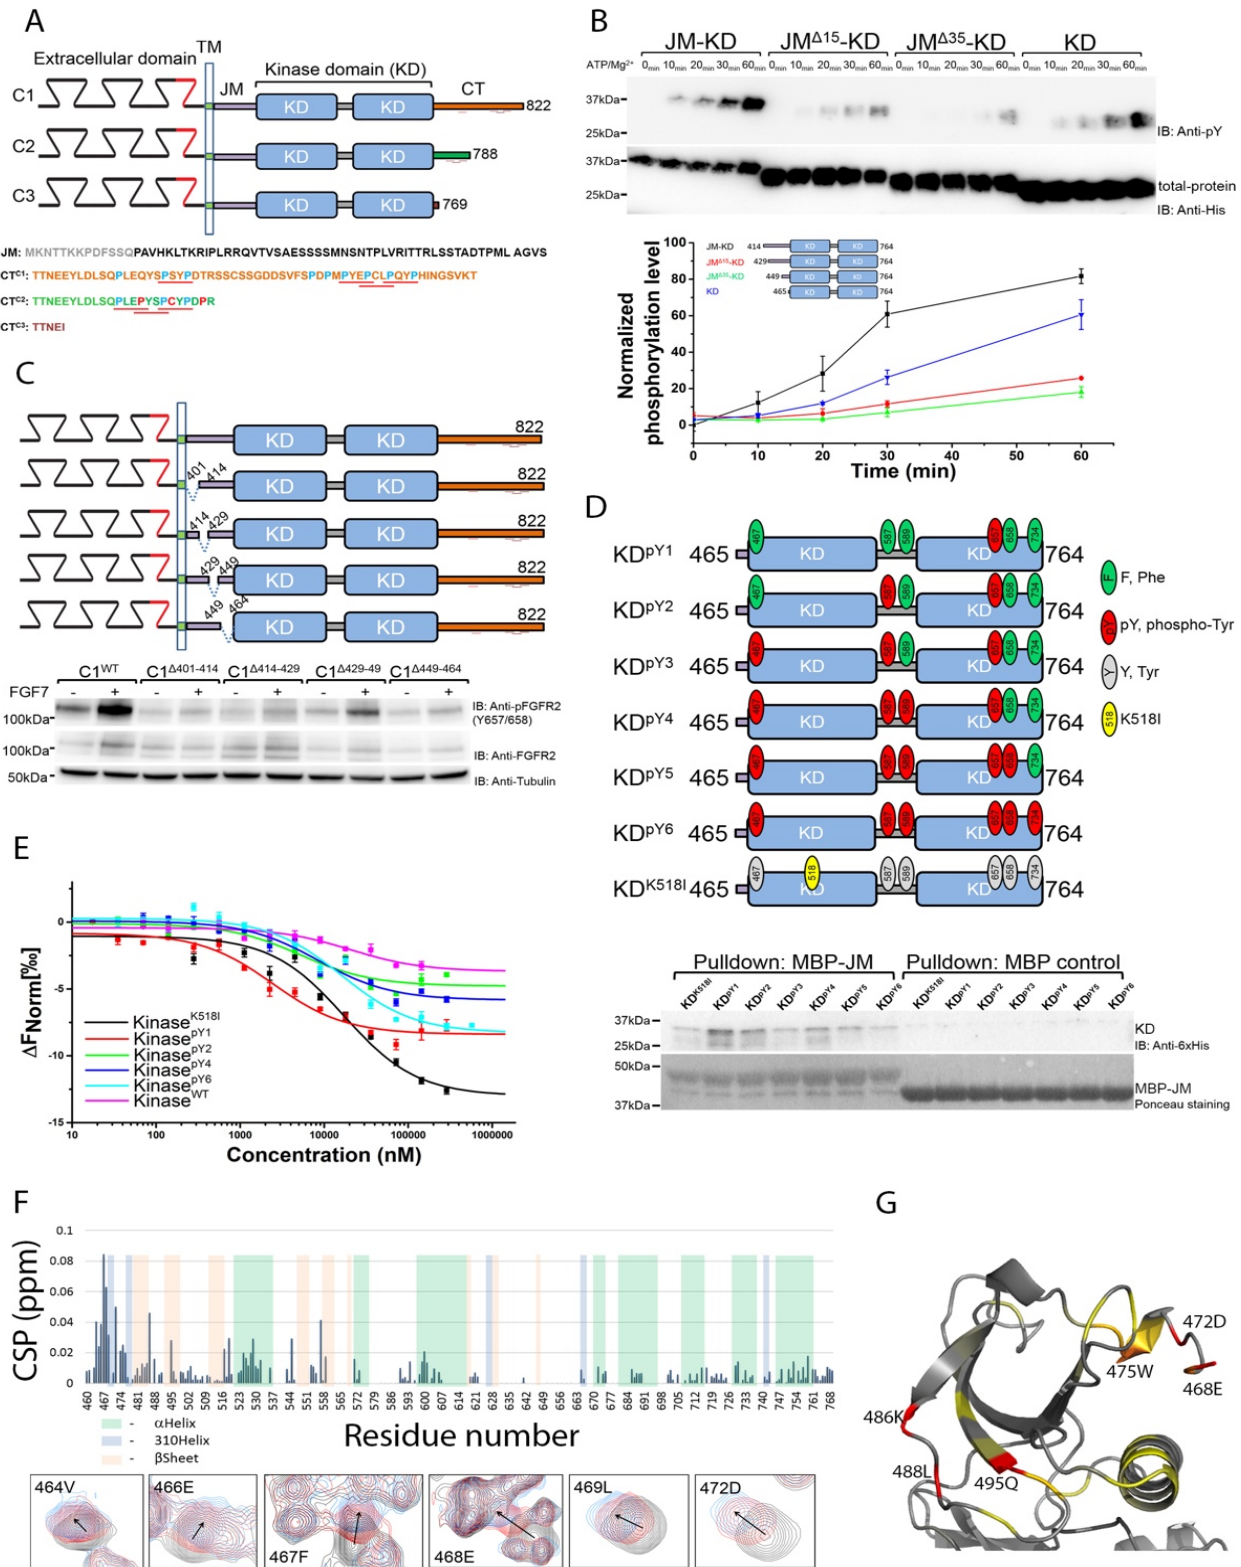

870 **Fig. 1. The presence of JM enhances activity of KD.** (A) Schematic diagram of FGFR2IIIb C1, C2, and  
871 C3 isoform. These isoforms differ only in their C-terminal tail. C1 isoform (orange) includes the full length  
872 C-terminal tail (CT<sup>C1</sup>); C2 isoform (green) has a truncated C-terminal tail (CT<sup>C2</sup>) and also includes three  
873 point mutations (red); the C3 isoform (purple) is truncated by 56 residues (CT<sup>C3</sup>). Proline residues are  
874 shown (blue) and proline-rich motifs in C1 and C2 isoforms are underlined. JM sequence is also shown  
875 (black) – membrane-bound sequence of JM (grey). (B) *In vitro* kinase assay using progressive JM-  
876 deletions in JM-KD (residues 414-764, black; 431-764, red; 447-764, green; and 465-764, blue). 100 nM  
877 of each protein was used for the *in vitro* phosphorylation assay (see STAR Methods for details).  
878 Phosphorylation levels were determined using a general pY99 antibody. His-tag antibody was used for  
879 total protein control. (C) Intermittent deletions in JM down-regulate FGFR2 activity. HEK293T cells were  
880 transfected with FGFR2 with JM deletions (C1<sup>Δ401-414</sup>, C1<sup>Δ414-429</sup>, C1<sup>Δ429-449</sup>, and C1<sup>Δ449-464</sup>). Cells were  
881 serum starved overnight and left unstimulated or stimulated with 10ng/ml FGF7 for 15 min. Cell lysates  
882 were blotted with indicated antibodies. (D) Binding of JM to progressively phosphorylated KD. Six  
883 tyrosine residues on KD were mutated to mimic the sequential phosphorylation pattern of KD (KD<sup>pY1</sup> to  
884 KD<sup>pY6</sup>; fig. S1A). MBP-JM was used to pulldown KDs (His-tagged). (E) MST measurements of the  
885 binding affinity between JM and KD with different phosphorylation levels. JM was labelled with Atto 488  
886 dye and serial dilutions of KD were titrated at 25°C. (F) CSPs of <sup>15</sup>N-KD<sup>pY1</sup> titrated by JM derived from  
887 <sup>1</sup>H-<sup>15</sup>N HSQC spectra (fig. S1E). Large changes occur on the N-terminal lobe. Selected residues  
888 experiencing major CSPs are shown as the bottom panels. (G) CSPs from residues in <sup>15</sup>N-KD<sup>pY1</sup> as JM is  
889 titrated plotted on the structure of KD<sup>pY1</sup>. CSPs shown as gradient: Yellow – lower, Red - higher. Selected  
890 residues with major CSPs are labelled.

891

892



Figure 2

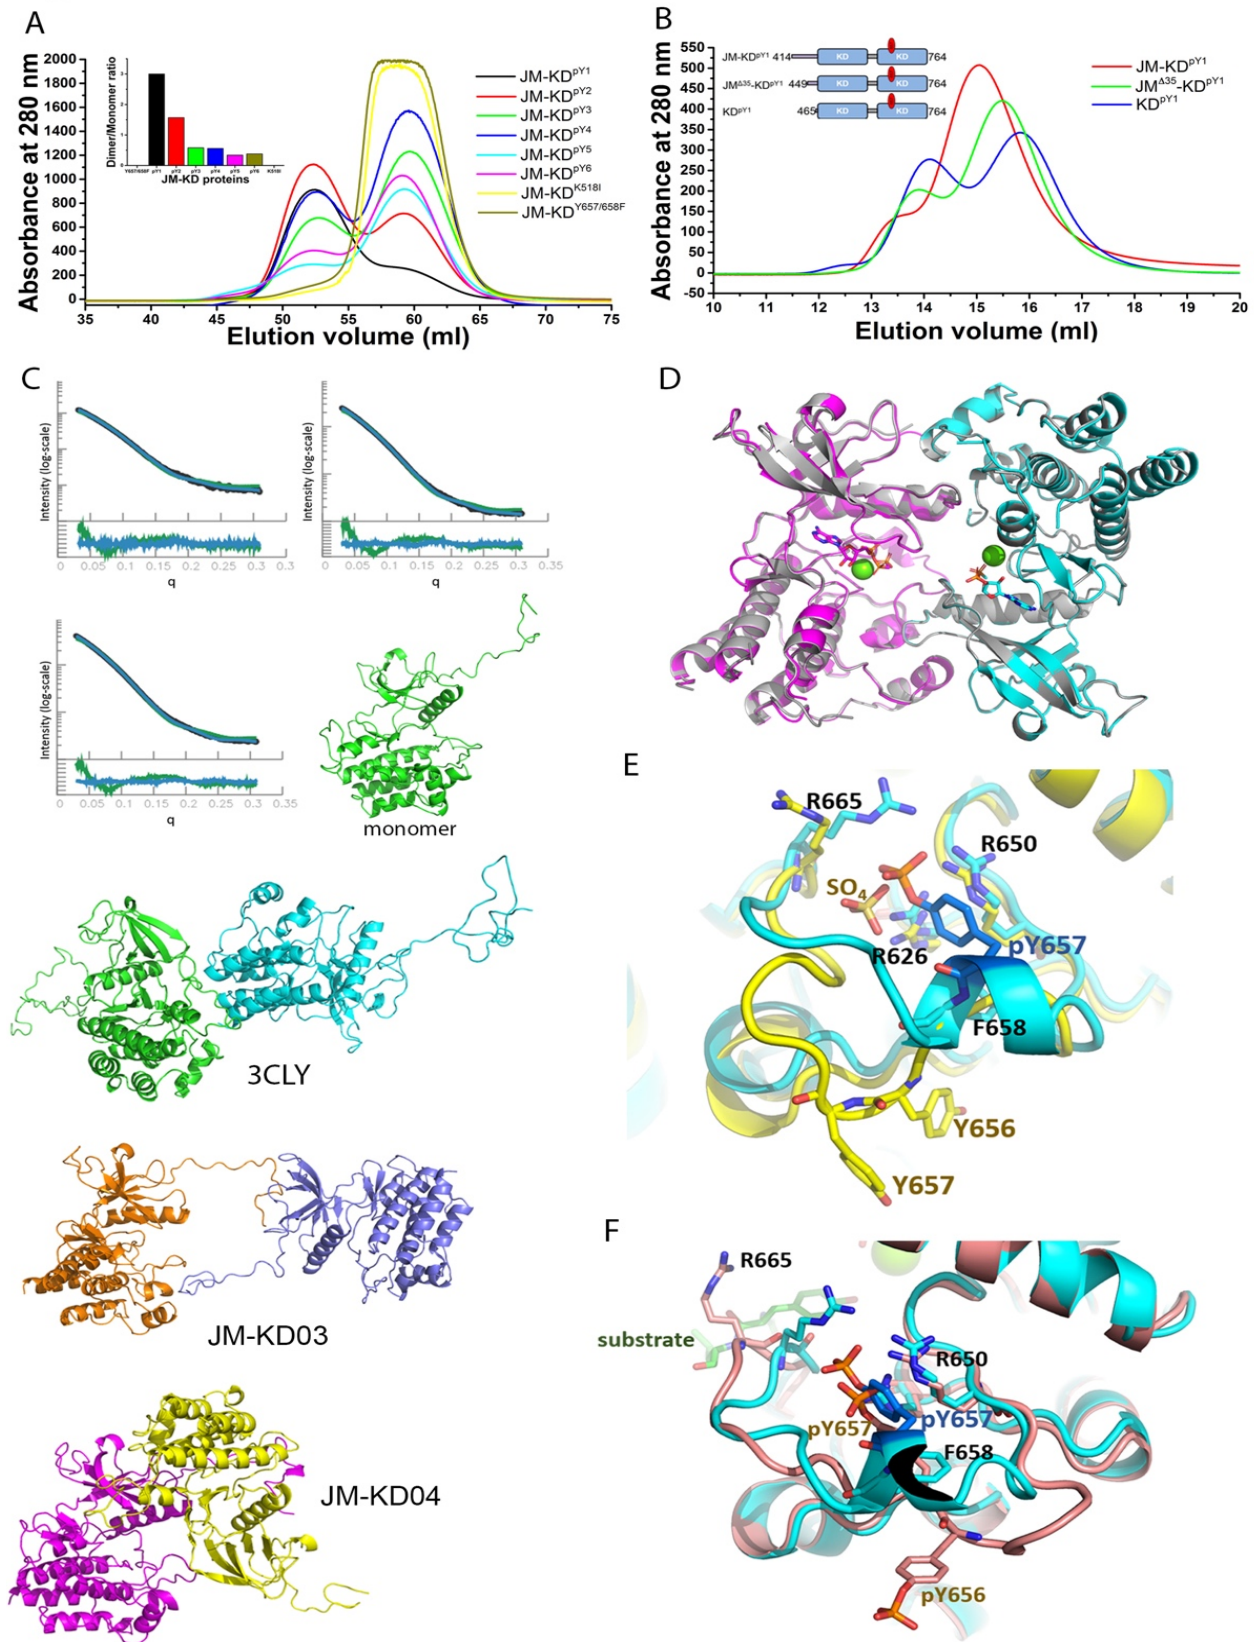



938 **Fig. 2. JM forms an intermolecular interaction in an asymmetric KD dimer.** (A) JM-KD construct  
939 with progressively increasing pY residues on KD were run on size exclusion chromatography (SEC) at 60  
940 - 80  $\mu\text{M}$  (inset: dimer/monomer ratio of KD with different phosphorylation levels). (B) Dimerization of  
941  $\text{KD}^{\text{pY1}}$  is reduced in the presence of JM. The dimerization of JM-KD $^{\text{pY1}}$  constructs with JM deletions (JM-  
942  $\text{KD}^{\text{pY1}}$ ; JM $^{\Delta 35}$ -KD $^{\text{pY1}}$ ; and KD $^{\text{pY1}}$ ) was determined using 10  $\mu\text{M}$  injected on a size exclusion column. (C)  
943 SAXS description of the structure of JM-KD $^{\text{pY1}}$ . Top panel: the calculated SAXS pattern for 1-state  
944 (green) and 3-state (blue) models fitted to the experimental data (black) at different total KD  
945 concentrations (left plot, 65  $\mu\text{M}$ ; middle, 130  $\mu\text{M}$  and right 210  $\mu\text{M}$ ); bottom panel: residuals of fit for 1-  
946 state (green) and 3-state models (blue). The resolution,  $q$ , is given in  $1/\text{\AA}$  and the intensity is given in  
947 arbitrary units. Model structures based on crystal structure-derived and *in silico*-docked dimeric and  
948 multimeric assemblies. Mono – structure of the monomeric state, JM-KD03 - two kinases (orange/blue)  
949 loosely connected through their JM interactions; JM-KD04 asymmetric dimer where JM of the enzyme-  
950 like state (magenta) binds to the substrate-and cyan). (D) Asymmetric unit of KD $^{\text{pY1}}$  containing four  
951 molecules. Phosphorylated chains A (magenta) and C (cyan) superimposed onto chains C and D (grey).  
952 ATP shown as stick model, and  $\text{Mg}^{2+}$  as green sphere. (E) A-loop superposition between KD $^{\text{pY1}}$  (chain B,  
953 cyan) and unphosphorylated kinase with 2PSQ (chain A, yellow). (F) Zoom into the A-loop between  
954 KD $^{\text{pY1}}$  (chain B) and dephosphorylated kinase with 2PVF (salmon).  
955  
956

Figure 3

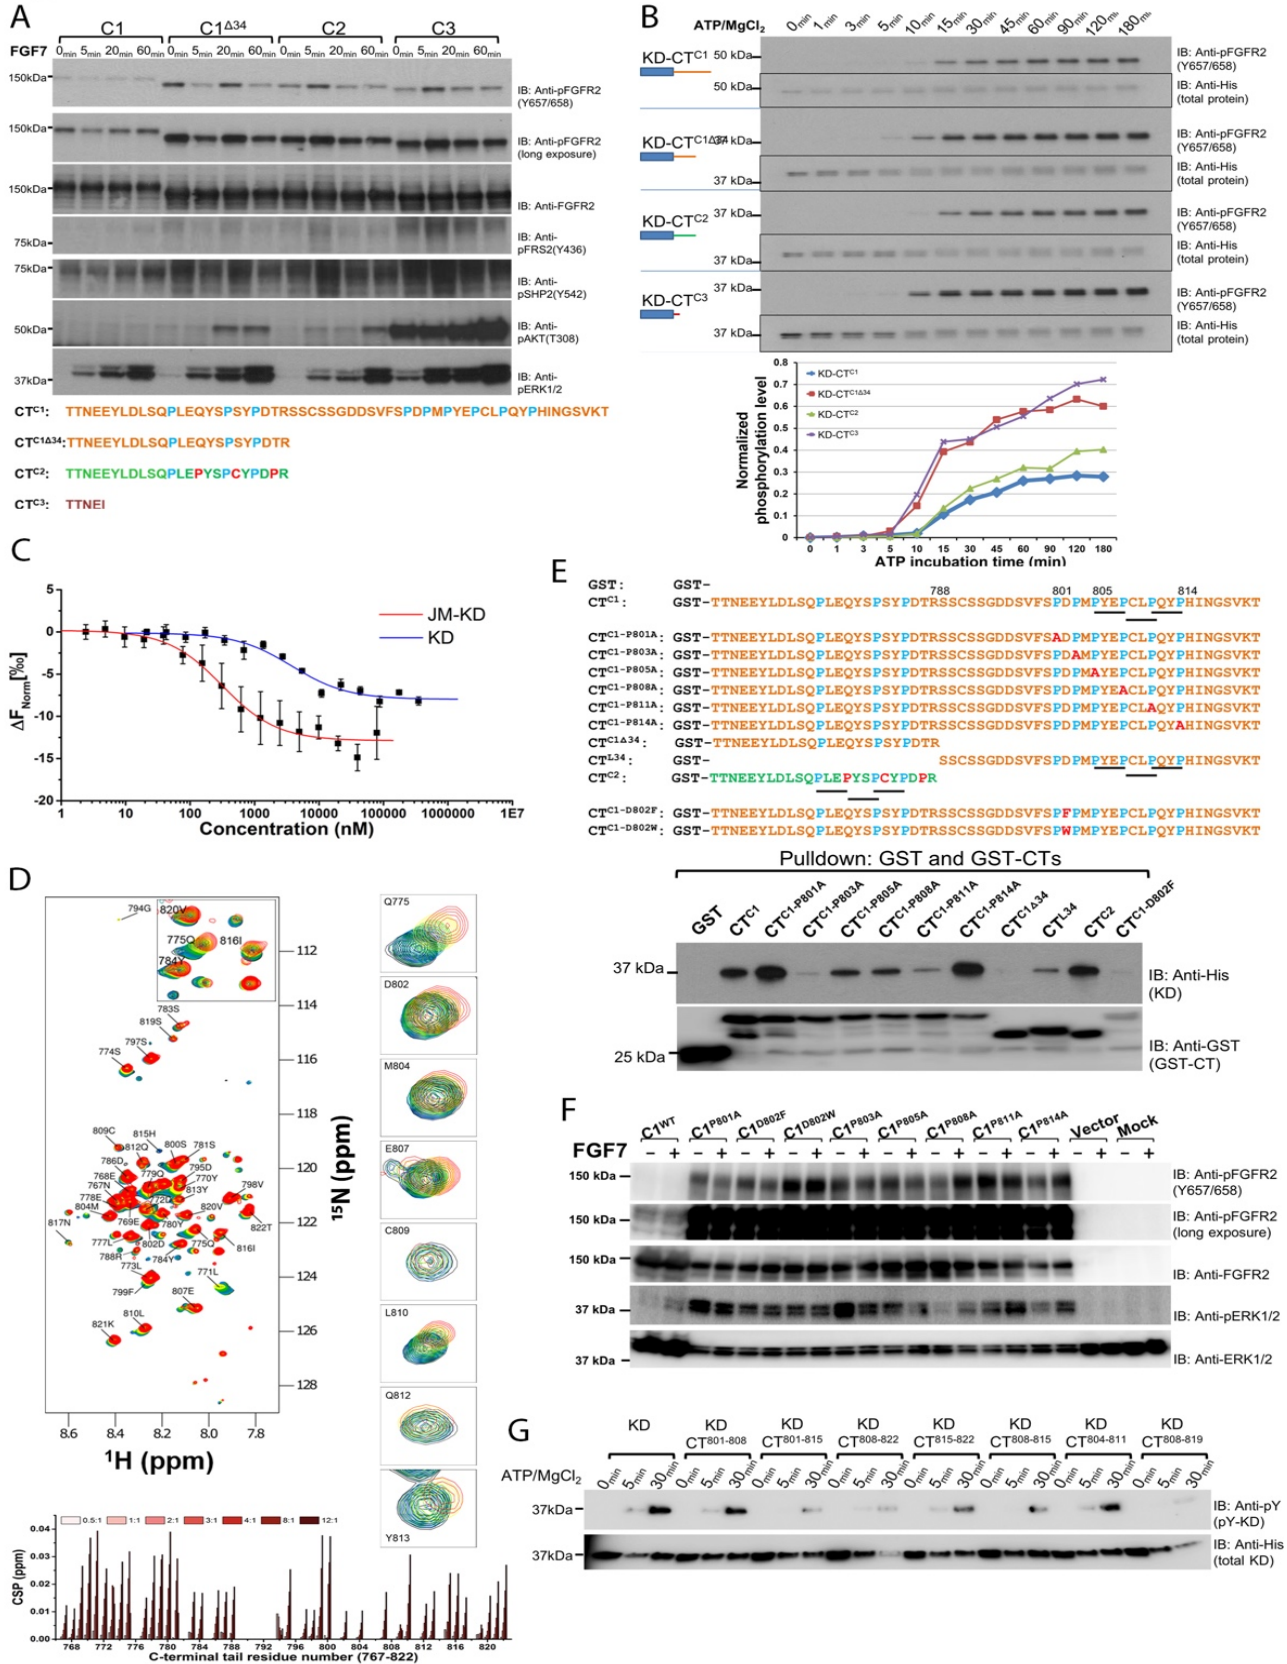

958 **Fig. 3. Proline-rich motifs interact and downregulate kinase activity.** (A) Immunoblotting analysis of  
959 signalling activity of FGFR2IIIb isoforms. FGFR2<sup>C1</sup>; FGFR2<sup>C1Δ34</sup>; FGFR2<sup>C2</sup> and FGFR2<sup>C3</sup> were  
960 transfected into HEK293T cells. Cells were starved or stimulated with 10ng/ml FGF7. The levels of  
961 receptor phosphorylation and downstream activity on each isoform were probed with the indicated  
962 antibodies. (B) Proline-rich CT inhibits *in vitro* kinase activity. Recombinant KD-CT<sup>C1</sup>, KD-CT<sup>C2</sup>, KD-  
963 CT<sup>C3</sup> and control clone: KD-CT<sup>C1Δ34</sup> were incubated with ATP/Mg<sup>2+</sup> at 25 °C and quenched with 100 mM  
964 EDTA at different time points as indicated. The activation level was measured using an anti-pY657/658  
965 antibody. Bottom: The densitometry analysis of kinase activity (KD-CT<sup>C1</sup> – blue; KD-CT<sup>C2</sup> – green; KD-  
966 CT<sup>C3</sup> – purple and KD-CT<sup>C1Δ34</sup> – red). (C) The affinities of CT<sup>C1</sup> to JM-KD<sup>pY1</sup> (red) and KD<sup>pY1</sup> (blue)  
967 determined using MST. CT<sup>C1</sup> was labelled with Atto488 dye then titrated with unlabelled JM-KD<sup>pY1</sup> and  
968 KD<sup>pY1</sup>. (D) HSQC spectra of unbound <sup>1</sup>H-<sup>15</sup>N-labelled CT<sup>C1</sup> overlaid with KD<sup>pY1</sup>-bound CT<sup>C1</sup> at different  
969 ratio (black (0:1) to red (12:1)). Examples of peaks with high chemical-shift perturbations (CSPs) are  
970 shown by labels indicating the assignment of given peaks. CSPs chat of <sup>15</sup>N-KD<sup>pY1</sup> titrated by CT<sup>C1</sup> was  
971 derived from <sup>1</sup>H-<sup>15</sup>N HSQC spectra. Large changes occur on both N-terminal and C-terminal residues of  
972 CT<sup>C1</sup>. (E) Wild type GST-CT<sup>C1</sup> and its individual P to A mutants , the first 24 residues of CT (CT<sup>C1Δ34</sup>),  
973 the last 34 residues (CT<sup>L34</sup>), CT<sup>C2</sup> and CT<sup>C1</sup> D802F or D802W (to explore the importance of the charged  
974 acid group in binding) were used for a GST pulldown experiment with KD<sup>pY1</sup>. The symmetric dimerization  
975 of KD<sup>pY1</sup> at the concentration range used in this experiment (1 μM) was assumed to have negligible impact  
976 on binding of the various CT variants. (F) The presence of the intact proline-rich motif in FGFR2<sup>C1</sup> inhibits  
977 both FGFR2 and downstream ERK1/2 activities. FGFR2<sup>C1</sup> variants with individual P/A, D/F, and D/W  
978 mutants as indicated were transfected into HEK293T cells. Cells were starved or stimulated with 10ng/ml  
979 FGF7 for 15 minutes. Cell lysates were blotted with indicated antibodies to examine the importance of  
980 the proline-rich sequence on CT. (G) Dephosphorylated KD was incubated with seven CT-derived short  
981 peptides including fragments of the proline-rich sequences (residues 801-808; 801-815; 808-822; 815-  
982 822; 808-815; 804-811 and 808-819) to test their ability to regulate kinase activity. See STAR Methods  
983 for phosphorylation and quenching procedures.

984

985

Figure 4

A

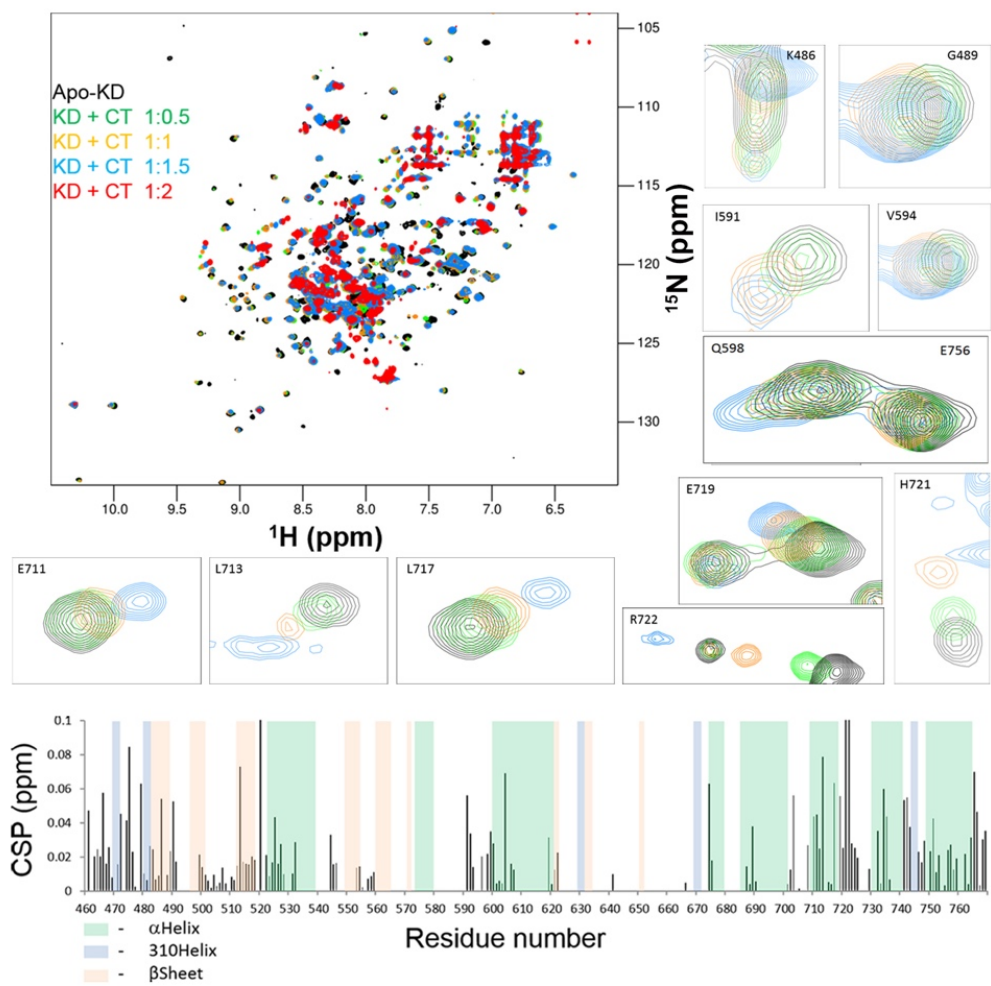

B

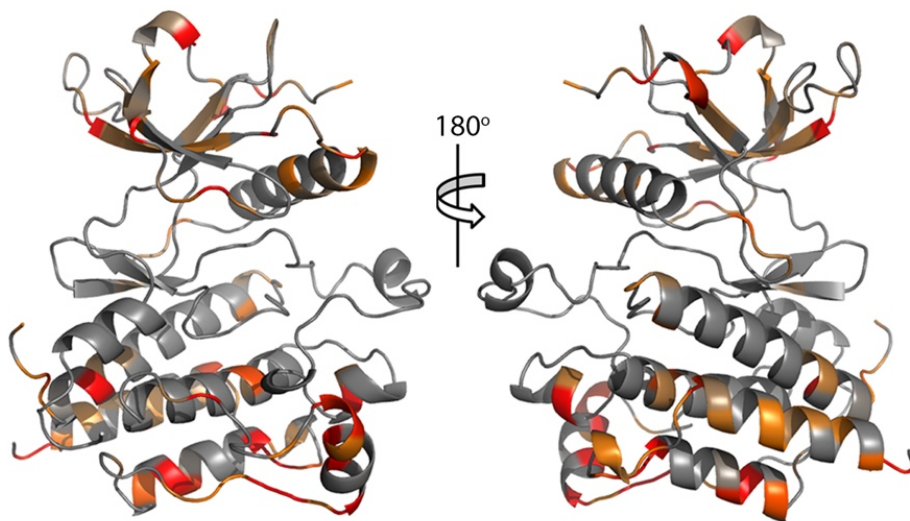

1019 **Fig. 4. Identification of CT binding site on KD using NMR.** (A)  $^1\text{H}$ - $^{15}\text{N}$  HSQC spectra of unbound  
1020 FGFR2  $\text{KD}^{\text{PY1}}$  (Black) overlaid with  $\text{CT}^{\text{C1}}$  bound  $\text{KD}^{\text{PY1}}$  at different concentration ratios. Examples of  
1021 peaks with major CSPs shown. CSPs chart of  $\text{CT}^{\text{C1}}$  titrated into  $^{15}\text{N}$ - $\text{KD}^{\text{PY1}}$  derived from  $^1\text{H}$ - $^{15}\text{N}$  HSQC  
1022 spectra. Large CSPs are observed at both N-terminal and C-terminal lobes. (B) CSPs of  $\text{CT}^{\text{C1}}$  binding to  
1023  $\text{KD}^{\text{PY1}}$  plotted on the X-ray structure of mono-phosphorylated kinase. As shown in Fig. 1G, a red-to-  
1024 yellow gradient was used to indicate the CSP residues. Minor CSPs appear on one side of the regulatory  
1025  $\alpha\text{C}$  helix, suggesting the binding of JM could regulate kinase activity.

1026

1027

1028

1029

1030

1031

1032

1033

1034

1035

1036

1037

1038

1039

1040

1041

1042

1043

1044

1045

1046

1047

1048

1049

1050

1051

1052



Figure 5

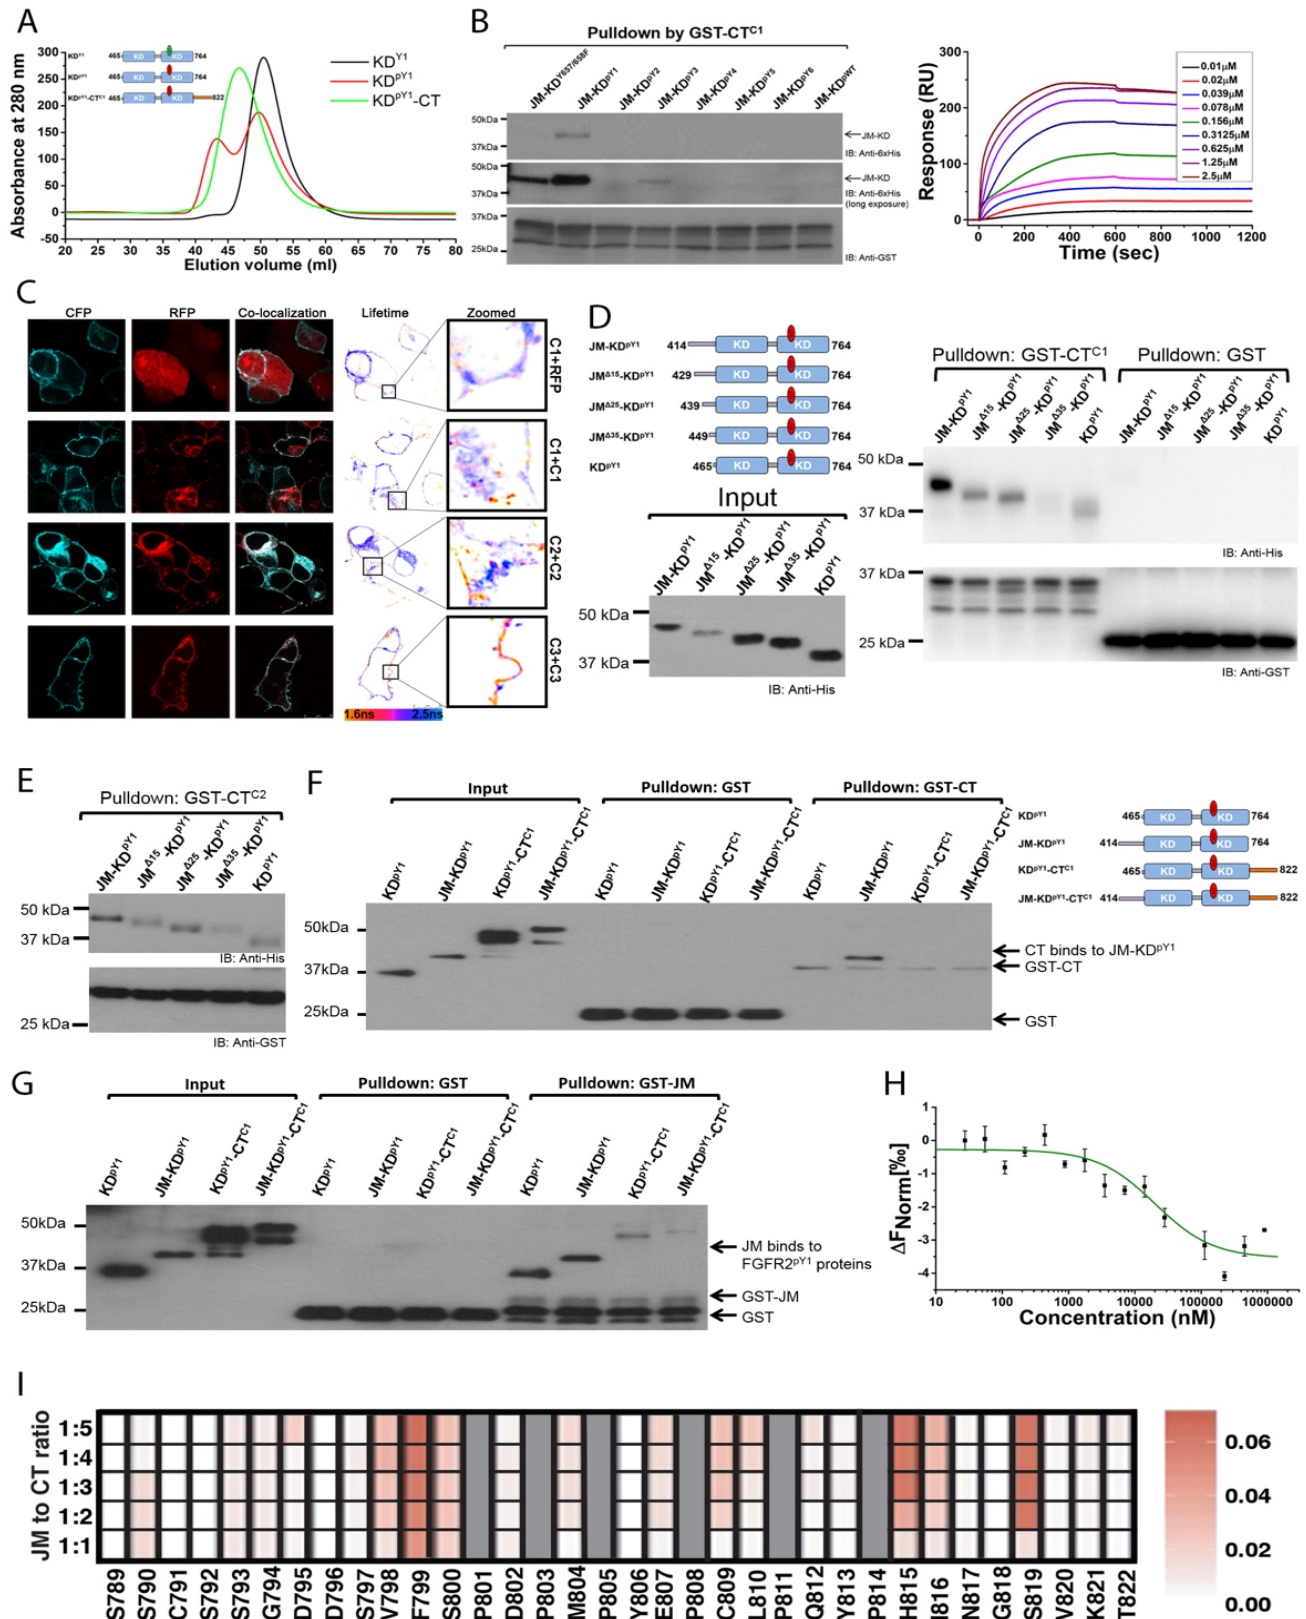

1054 **Fig. 5. CT binding to KD<sup>pY1</sup> disrupts the formation of asymmetric dimer.** (A) Dimerization status of  
1055 FGFR2 kinases in the presence or absence of CT. KD<sup>pY1</sup> (blue curve) includes a dominant population of  
1056 dimers at 60  $\mu$ M in SEC, whereas the unphosphorylated KD (green curve) prevails as a monomer. The  
1057 mono-phosphorylated KD<sup>pY1</sup>-CT construct (red curve) also exists as a monomer in solution. (B)  
1058 Phosphorylation of JM-KD affects CT binding. GST-CT<sup>C1</sup> was used to pulldown the progressively  
1059 increasing phosphorylation of JM-KD constructs. The pulldown indicates that JM-KD<sup>pY1</sup> was the best  
1060 binding partner for GST-CT<sup>C1</sup>. (C) Dimerization of FGFR2. FLIM analysis of the FRET between the  
1061 FGFR2-CFP and FGFR2-RFP. First panel: Reference lifetime measurements between FGFR2-GFP and  
1062 RFP-alone, control for no interaction. The mean lifetime is centred around  $\sim$ 2.1 ns (Blue), which  
1063 corresponds to the mean lifetime for isolated CFP alone. Second panel: Dimerization of C1 showing a  
1064 measurable left shift with of the molecule showing FRET above the control. Note that most interactions  
1065 are seen in the intracellular vesicles. Third panel: Dimerization of C2. 16% of molecules on plasma  
1066 membrane showing dimerization above the control threshold (Orange). Forth panel: Dimerization of C3,  
1067 as with C1, 26% of the molecules are showing interaction (Orange) however unlike C1, almost all of the  
1068 interactions are on the plasma membrane. Inserts with arrows showing exquisite separation of dimeric and  
1069 non-dimeric FGFR2-C3 on the plasma membrane. (D) GST-CT<sup>C1</sup> was used to pull down five mono-  
1070 phosphorylated constructs of JM-KD<sup>pY1</sup> with progressively truncated JM (JM-KD<sup>pY1</sup>, JM <sup>$\Delta$ 15</sup>-KD<sup>pY1</sup>,  
1071 JM <sup>$\Delta$ 25</sup>-KD<sup>pY1</sup>, JM <sup>$\Delta$ 35</sup>-KD<sup>pY1</sup>, and KD<sup>pY1</sup>). The presence of the intact JM enhances the interaction with  
1072 GST-CT<sup>C1</sup>. (E) GST-CT<sup>C2</sup> was used to pull down five mono-phosphorylated constructs of JM-KD<sup>pY1</sup> as  
1073 described in Fig. 6D. The presence of the intact JM also enhances the interaction with the CT from C2  
1074 isoform. (F) A GST-CT<sup>C1</sup> pulldown of different FGFR2IIIb mono-phosphorylated proteins that include  
1075 the presence or absence of JM and/or CT (KD<sup>pY1</sup>; JM-KD<sup>pY1</sup>; KD<sup>pY1</sup>-CT, and JM-KD<sup>pY1</sup>-CT), shows that  
1076 the presence of JM, but not CT, promotes the interaction between kinase domain and GST-CT<sup>C1</sup>. The  
1077 presence of CT inhibits the GST-CT<sup>C1</sup> interaction, indicating CT binds through an intramolecular  
1078 interaction. (G) A GST-JM pulldown of different FGFR2IIIb mono-phosphorylated proteins (as described  
1079 in Fig. 5F), shows that the presence of JM does not block JM binding suggesting that JM of one protomer  
1080 binds to the other in the mono-phosphorylated dimers (previously identified for KD and JM-KD). The  
1081 latch to the protomer in the asymmetric dimer leaves an available JM binding site. The presence of CT (in  
1082 KD-CT<sup>C1</sup> and JM-KD<sup>pY1</sup>-CT<sup>C1</sup>) reduces JM binding. (H) MST measurement of JM binding to CT. A two-  
1083 fold serial dilution of CT was titrated into JM which was labelled with Atto 488. (I) NMR titration of JM  
1084 titrated into <sup>15</sup>N-labelled CT using a red-to-white gradient, where white represents the weakest CSP and  
1085 red depicts the strongest CSP. Proline residues are not visible in this experiment (shown in grey).  
1086

Figure 6

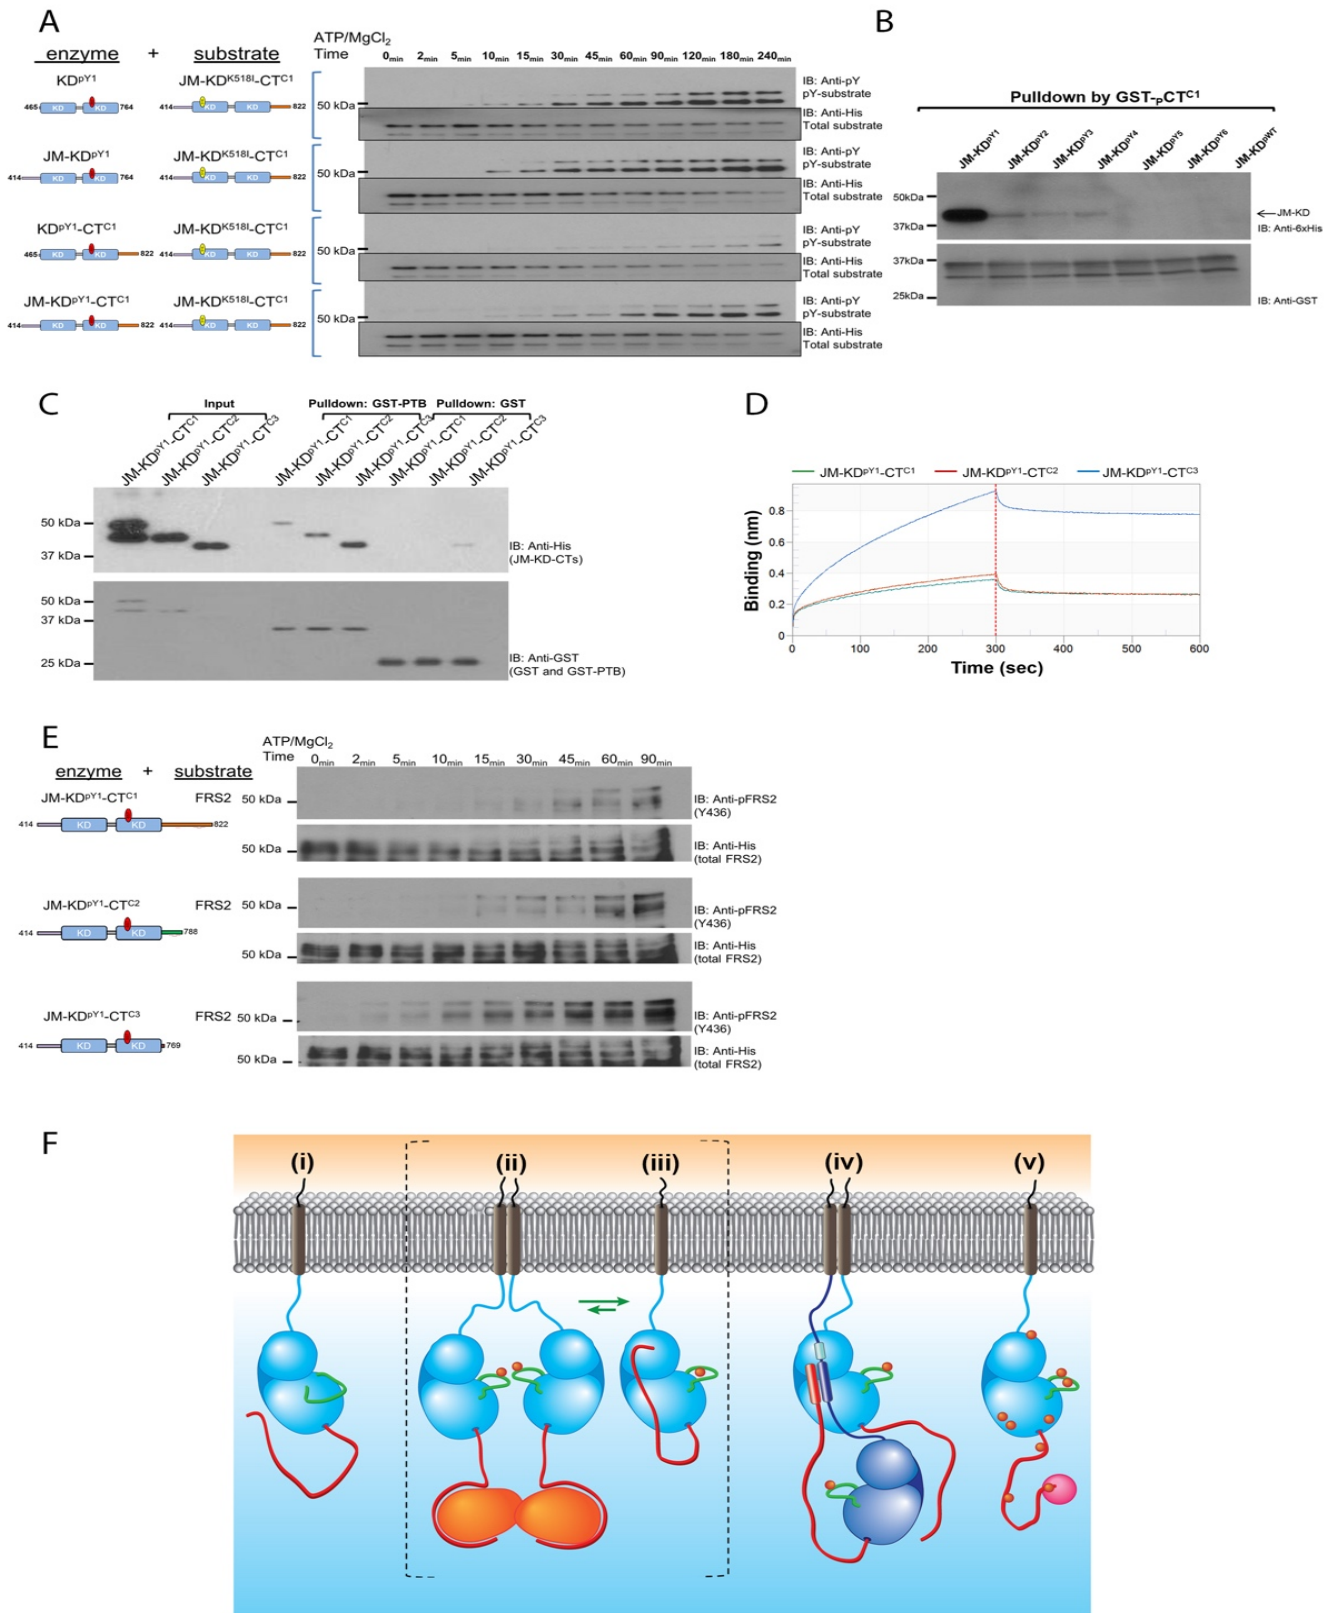

1088 **Fig. 6. JM and CT combine to regulate KD.** (A) Kinase activity is controlled by both JM and CT.  
1089  $KD^{pY1}$ ,  $JM-KD^{pY1}$ ,  $KD^{pY1}-CT^{C1}$ , and  $JM-KD^{pY1}-CT^{C1}$ , were incubated with kinase-dead  $JM-KD^{K518L}$ -  
1090  $CT^{C1}$  in a 1:1000 ratio in the presence of ATP/Mg<sup>2+</sup> and quenched with EDTA at different time points as  
1091 indicated. The phosphorylation of  $JM-KD^{K518L}-CT^{C1}$  was measured using a pY99 antibody. (B)  
1092 Phosphorylation of CT ( $pCT^{C1}$ ) reduces its binding to KD with higher phosphorylation order. GST- $CT^{C1}$   
1093 was phosphorylated by  $JM-KD^{WT}-CT^{C1}$  and used for a GST pulldown assay with different phosphorylated  
1094 JM-KD ( $JM-KD^{pY1}$  –  $JM-KD^{pY6}$  and wild type JM-KD). (C) GST-FRS2 PTB domain was used precipitate  
1095 the following His-tagged constructs representing the mono-phosphorylated isoforms of FGFR2IIIb;  $JM$ -  
1096  $KD^{pY1}-CT^{C1}$ ,  $JM-KD^{pY1}-CT^{C2}$  and  $JM-KD^{pY1}-CT^{C3}$ . The presence of the intact CT in the C1 isoform  
1097 inhibits the interaction of FRS2 with its cognate site on JM. (D) BLI measurement of GST-FRS2 PTB  
1098 binding to  $JM-KD^{pY1}-CT^{C1}$ ,  $JM-KD^{pY1}-CT^{C2}$  and  $JM-KD^{pY1}-CT^{C3}$ . The GST-PTB domain from FRS2 was  
1099 immobilised on the sensor and was exposed to 2.6  $\mu$ M of the cytoplasmic region of each of the FGFR2  
1100 isoforms. After 300 s the chip was washed. The sensorgrams clearly show that over the time course up to  
1101 300 seconds (prior to the washing step; dotted line), in the absence of CT (C3 isoform) a significantly  
1102 increased amount of FGFR2 protein binds to the PTB domain compared with the C1 and C2 isoforms. (E)  
1103 The FGFR2 isoforms ( $JM-KD^{pY1}-CT^{C1}$ ,  $JM-KD^{pY1}-CT^{C2}$  and  $JM-KD^{pY1}-CT^{C3}$ ) were incubated with FRS2  
1104 protein in a 1:100 ratio in the presence of ATP/Mg<sup>2+</sup> and quenched at different time points as indicated.  
1105 The phosphorylation of FRS2 was measured using an anti-pFRS2 (Y436) antibody. (F) i: In the absence  
1106 of stimulation the unphosphorylated FGFR2 (light blue, JM light blue line, CT red line) can exist as a  
1107 monomer freely diffusing through the plasma membrane. ii: Random collision of FGFR2 results in dimer  
1108 formation. Dimeric GRB2 (orange) is recruited via a proline-rich sequence on CT into a heterotetramer.  
1109 This stabilizes the mono-phosphorylated active A-loop (green line) tyrosine residues (red circles) on KD,  
1110 but signalling is stalled by the presence of GRB2 on CT. iii: the mono-phosphorylated KD provides a  
1111 strong binding site for CT. CT to  $KD^{pY1}$  interaction results in the releasing of GRB2. This interaction  
1112 inhibits the JM-mediated formation of asymmetric dimer and thus prevents the  $KD^{pY1}$  intermediate state  
1113 from further auto-phosphorylation activity. Active intermediate states ii: and iii: are in equilibrium, the  
1114 presence of the states is dependent on GRB2 concentration and hence the ability of GRB2 to compete with  
1115 the intramolecular interaction with KD for binding to CT. iv: Binding of extracellular growth factor co-  
1116 localizes two receptors and permits the formation the active, asymmetric dimeric conformation. This is  
1117 sustained by the interaction of JM from the enzyme-like receptor (dark blue) with KD of the substrate-  
1118 like receptor (light blue). The sequence on JM which binds to KD (light blue thick line) is immediately  
1119 proximal to a sequence (dark blue thick line) which binds in an independent interaction to CT of the  
1120 enzyme-like receptor. This binding site (red thick line) includes the proline-rich motif that recognizes a  
1121 site on KD and GRB2. Thus, JM-CT interaction blocks auto-inhibition and GRB2 recruitment. This  
1122 ensures that the active state is prolonged. In this conformation the CT of the substrate-like receptor can  
1123 access the enzyme-like KD active site. v: Prolonged activity of the dynamic asymmetric dimer results in  
1124 increasing phosphorylation of KD and CT. As the pY burden increases the dimerization between KDs  
1125 reduces until they fully dissociate. The phosphorylated KD abrogates the inhibitory intramolecular binding  
1126 of CT and the recruitment of GRB2. The receptor is therefore available for recruitment of downstream  
1127 effector proteins (magenta).

1128  
1129  
1130  
1131



1 **Supplementary Materials**

2

3 **Title**

4 Regulation of kinase activity by combined action of juxtamembrane and C-terminal

5 **Authors**

6 Chi-Chuan Lin<sup>1</sup>, Lukasz Wieteska<sup>1</sup>, Guillaume Poncet-Montange<sup>2</sup>, Kin M. Suen<sup>1</sup>, Stefan T.  
7 Arold<sup>3,4</sup>, Zamal Ahmed<sup>5</sup>, John E. Ladbury<sup>1\*</sup>

8

9 \*Corresponding author. Email: [j.e.ladbury@leeds.ac.uk](mailto:j.e.ladbury@leeds.ac.uk)

10

11

12 This file includes:

13 Figs. S1 to S6

14 Tables S1 to S4

## Supplemental Figure 1

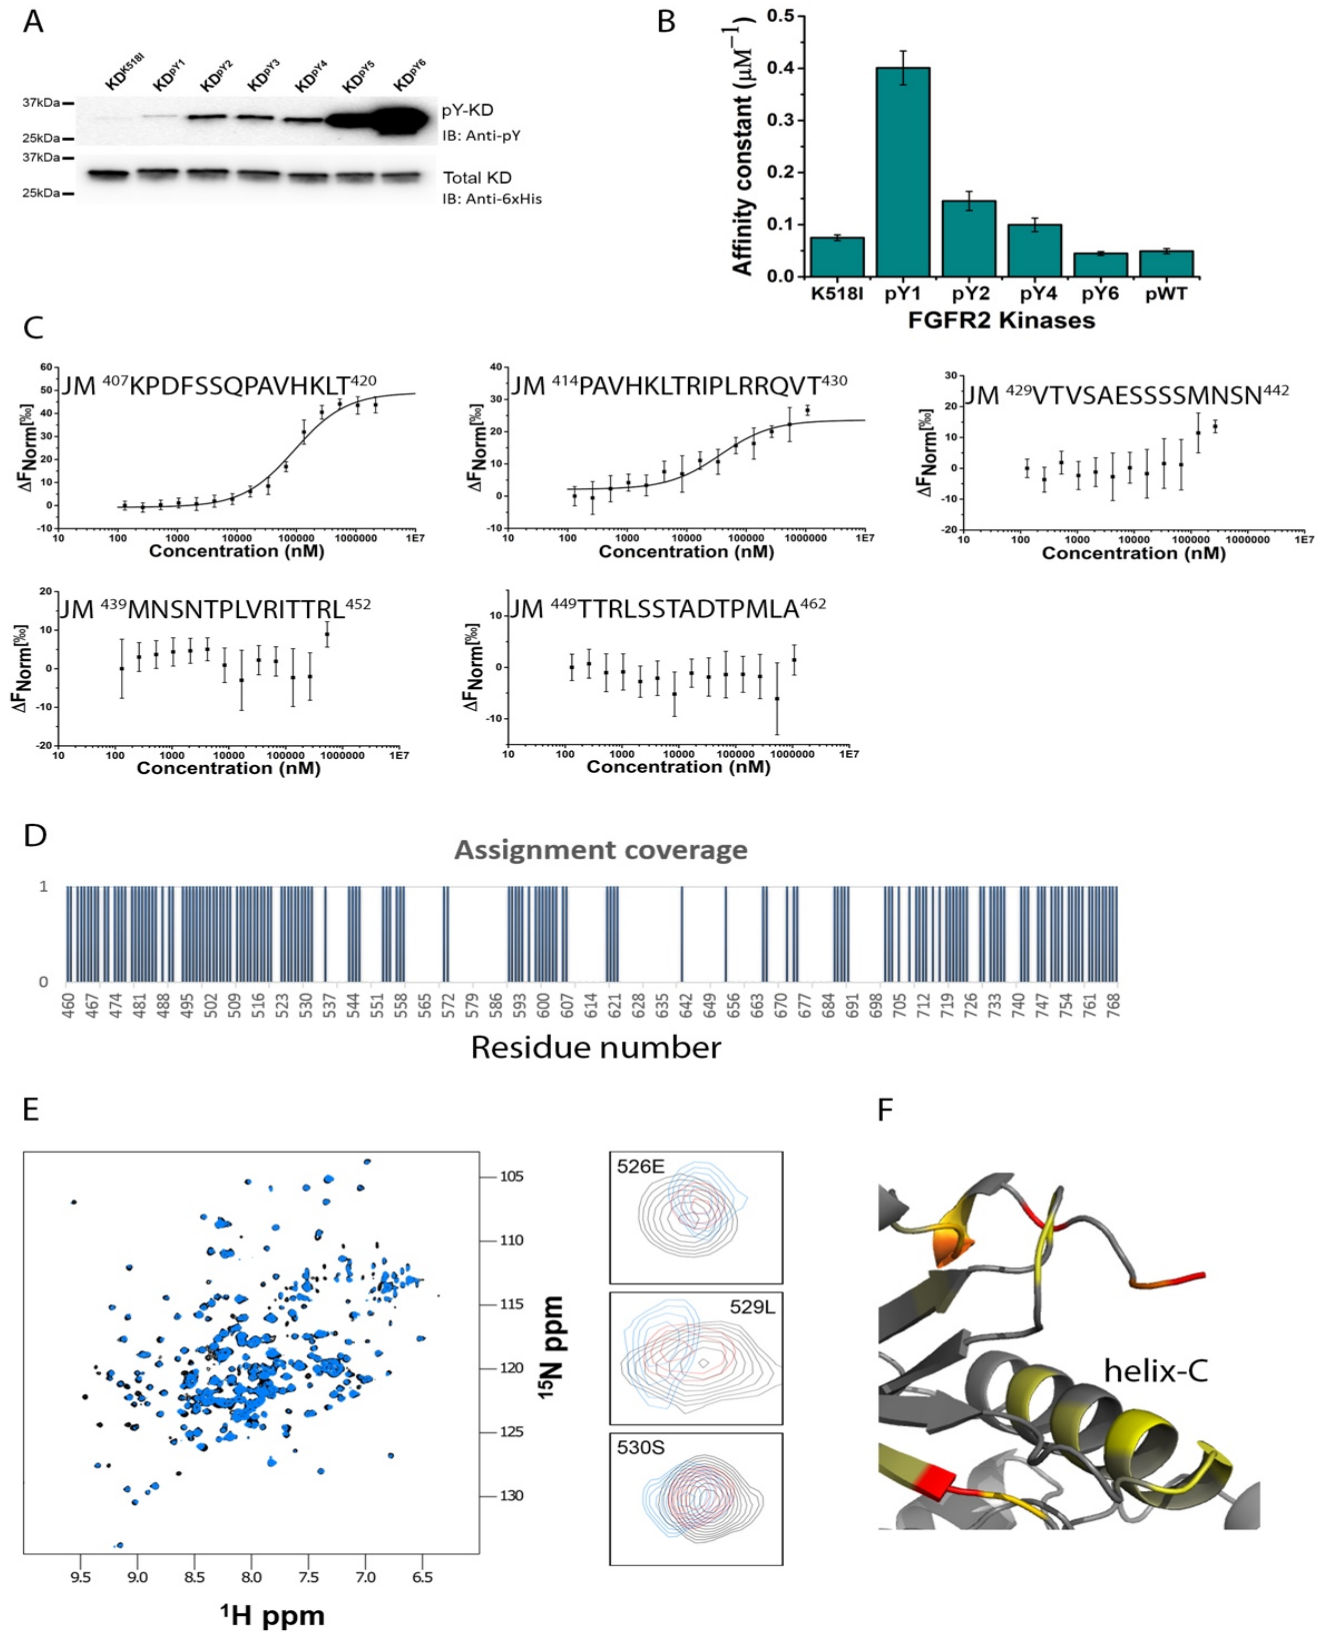

16 **Fig. S1. The interaction of JM to KD.** (A) The phosphorylation states of  $KD^{pY1}$  to  $KD^{pY6}$  were confirmed  
17 using a phosphotyrosine pY99 antibody. An anti-6xHis tag antibody was used to probe for total proteins  
18 as the loading control. (B) Quantification of binding affinities between JM and KD with different  
19 phosphorylation states. The mono-phosphorylated KD is the strongest binding partner for JM. (C) Five  
20 short JM peptides were synthesised (residues 407-420, 414-430, 429-442, 439-452, and 449-462) and  
21 used to identify the binding region for  $KD^{pY1}$ . The MST measurement results indicate that residue 407-  
22 420 provides the best binding ability for  $KD^{pY1}$ . (D) Assignment coverage of KD amide backbones.  
23 Overall percentage of the assignment used in all titration experiment was 56% (not including prolines).  
24 (E)  $^1H$ - $^{15}N$  HSQC spectra of unbound mono-phosphorylated FGFR2 kinase  $KD^{pY1}$  (black) overlay with  
25 JM bound  $KD^{pY1}$  (blue) at 1:2 ratio. Examples of peaks with high chemical-shift perturbations (CSPs) are  
26 shown by labels indicating the assignment of given peaks. (F) CSPs of JM binding to  $KD^{pY1}$  plotted on  
27 the X-ray structure of mono-phosphorylated kinase. Minor CSPs appear on one side of the regulatory  $\alpha$ -  
28 C helix, suggesting the binding of JM could regulate kinase activity. CSPs shown as gradient: Yellow –  
29 lower, Red - higher.  
30

Supplemental Figure 2

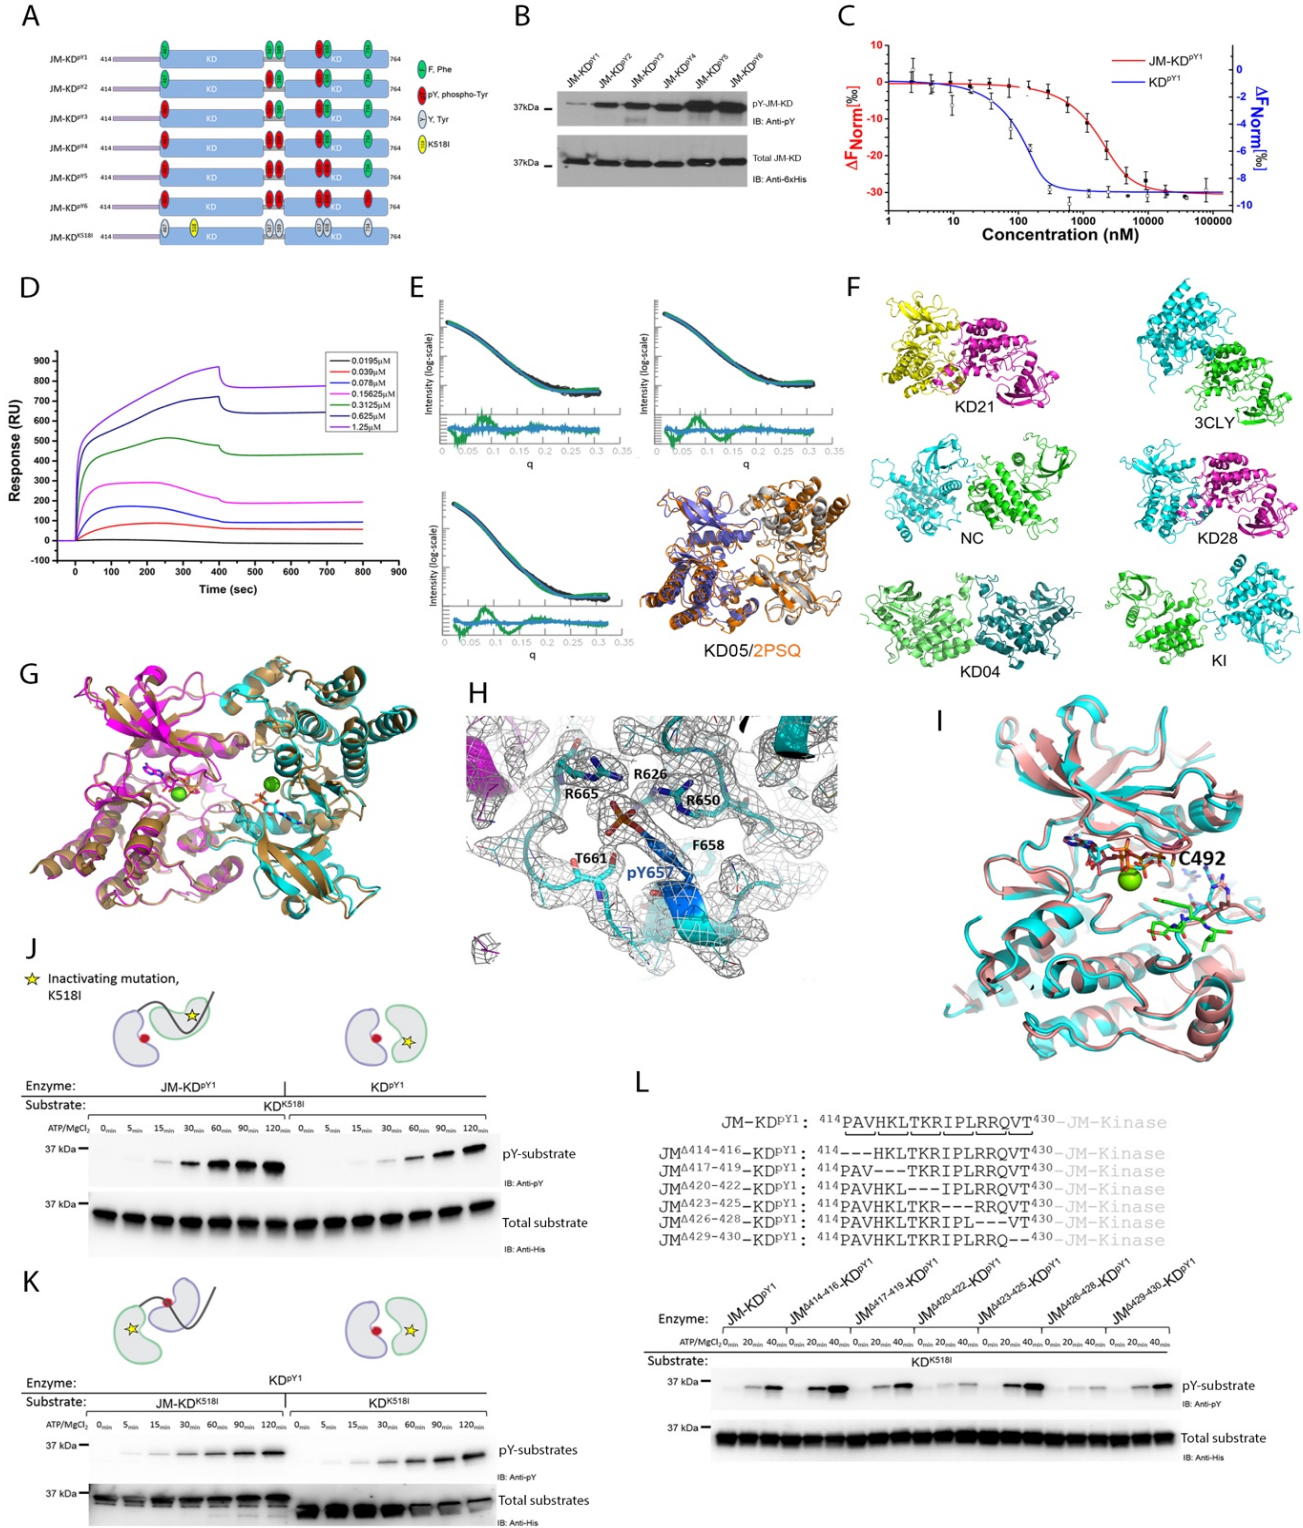



33 **Fig. S2. Dimerization of mono-phosphorylated kinase.** (A) Schematic of JM-KD with progressively  
34 phosphorylation KD (FGFR2<sub>414-764</sub>). Six tyrosine residues on KD were mutated to mimic the sequential  
35 phosphorylation pattern of KD (JM-KD<sup>pY1</sup> to JM-KD<sup>pY6</sup>). (B) Phosphorylation states of JM-KD<sup>pY1</sup> to JM-  
36 KD<sup>pY6</sup> were examined using a phosphotyrosine pY99 antibody. An anti-6xHis tag antibody was used to  
37 probe for total proteins as the loading control. (C) The ‘apparent’ dimerization  $K_d$  of JM-KD<sup>pY1</sup> (red) and  
38 KD<sup>pY1</sup> (blue) determined using MST. JM-KD<sup>pY1</sup> and KD<sup>pY1</sup> were labelled with Atto488 dye then titrated  
39 with unlabelled JM-KD<sup>pY1</sup> and KD<sup>pY1</sup>. (D) Dimerization of JM-KD<sup>pY1</sup> was examined using surface  
40 plasmon resonance (SPR). JM-KD<sup>pY1</sup> was immobilised on a CM4 chip by amine coupling, a serial dilution  
41 of JM-KD<sup>pY1</sup> was injected for 400 seconds and washed with buffer for further 400 seconds. The binding  
42 affinity was calculated using steady-state fitting model. (E) SAXS description of the structure of KD<sup>pY1</sup>.  
43 Top panel: the calculated SAXS pattern for 1-state (green) and 3-state (blue) models fitted to the  
44 experimental data (black) at different total maximum KD<sup>pY1</sup> concentrations (top left plot, 65  $\mu$ M; top right,  
45 130  $\mu$ M, and bottom 210  $\mu$ M). For each scattering dataset the bottom panel shows the residuals of fit for  
46 1-state (green) and 3-state models (blue). The resolution,  $q$ , is given in  $1/\text{\AA}$  and the intensity is given in  
47 arbitrary units. The structures in the bottom right panel show that the best-fitting crystal structure-derived  
48 (orange), and *in silico*-docked (blue/grey KD05) represent the same conformation. (F) Additional SAXS  
49 structures relevant to fitting of KD<sup>pY1</sup> or JM-KD<sup>pY1</sup> to SAXS data, reported in Fig. 2d, e and Table S3.  
50 (G) Phosphorylated chains A (magenta) and C (cyan) superimposed onto chains C and D (grey) together  
51 with both chains from the unphosphorylated FGFR2 kinase structure 2PSQ. ATP shown as a stick model  
52 and  $Mg^{2+}$  as green spheres. (H) A-loop (chain B) in its 2FoFc electron density. (I) Superimposition of  
53 KD<sup>pY1</sup> (chain B) with 2PVF (salmon). (J) At the basal state, the presence of JM in the substrate-acting  
54 molecule (JM-KD<sup>K518I</sup>) is required for the recruitment of kinase-acting molecule (KD<sup>pY1</sup>). This  
55 asymmetric dimer configuration is required for the enhancement of transphosphorylation as the  
56 phosphorylation levels of substrates (left panel: JM-KD<sup>K518I</sup>, right panel: KD<sup>K518I</sup>) were examined using a  
57 phosphotyrosine antibody (pY99). An anti-6xHis tag antibody was used to probe total proteins as the  
58 loading control. (K) The JM from JM-KD<sup>pY1</sup> cannot recruit and phosphorylate KD<sup>K518I</sup>. figs. S2J and S2K  
59 demonstrate a role of kinase activation at basal state by which the JM interacts *in trans*, recruiting and  
60 phosphorylating a substrate molecule. (L) Deletion in the JM identifies the critical motifs, <sup>420</sup>TKR<sup>422</sup> and  
61 <sup>426</sup>RRQ<sup>428</sup>, for JM to recruit and phosphorylate substrate.  
62

### Supplemental Figure 3

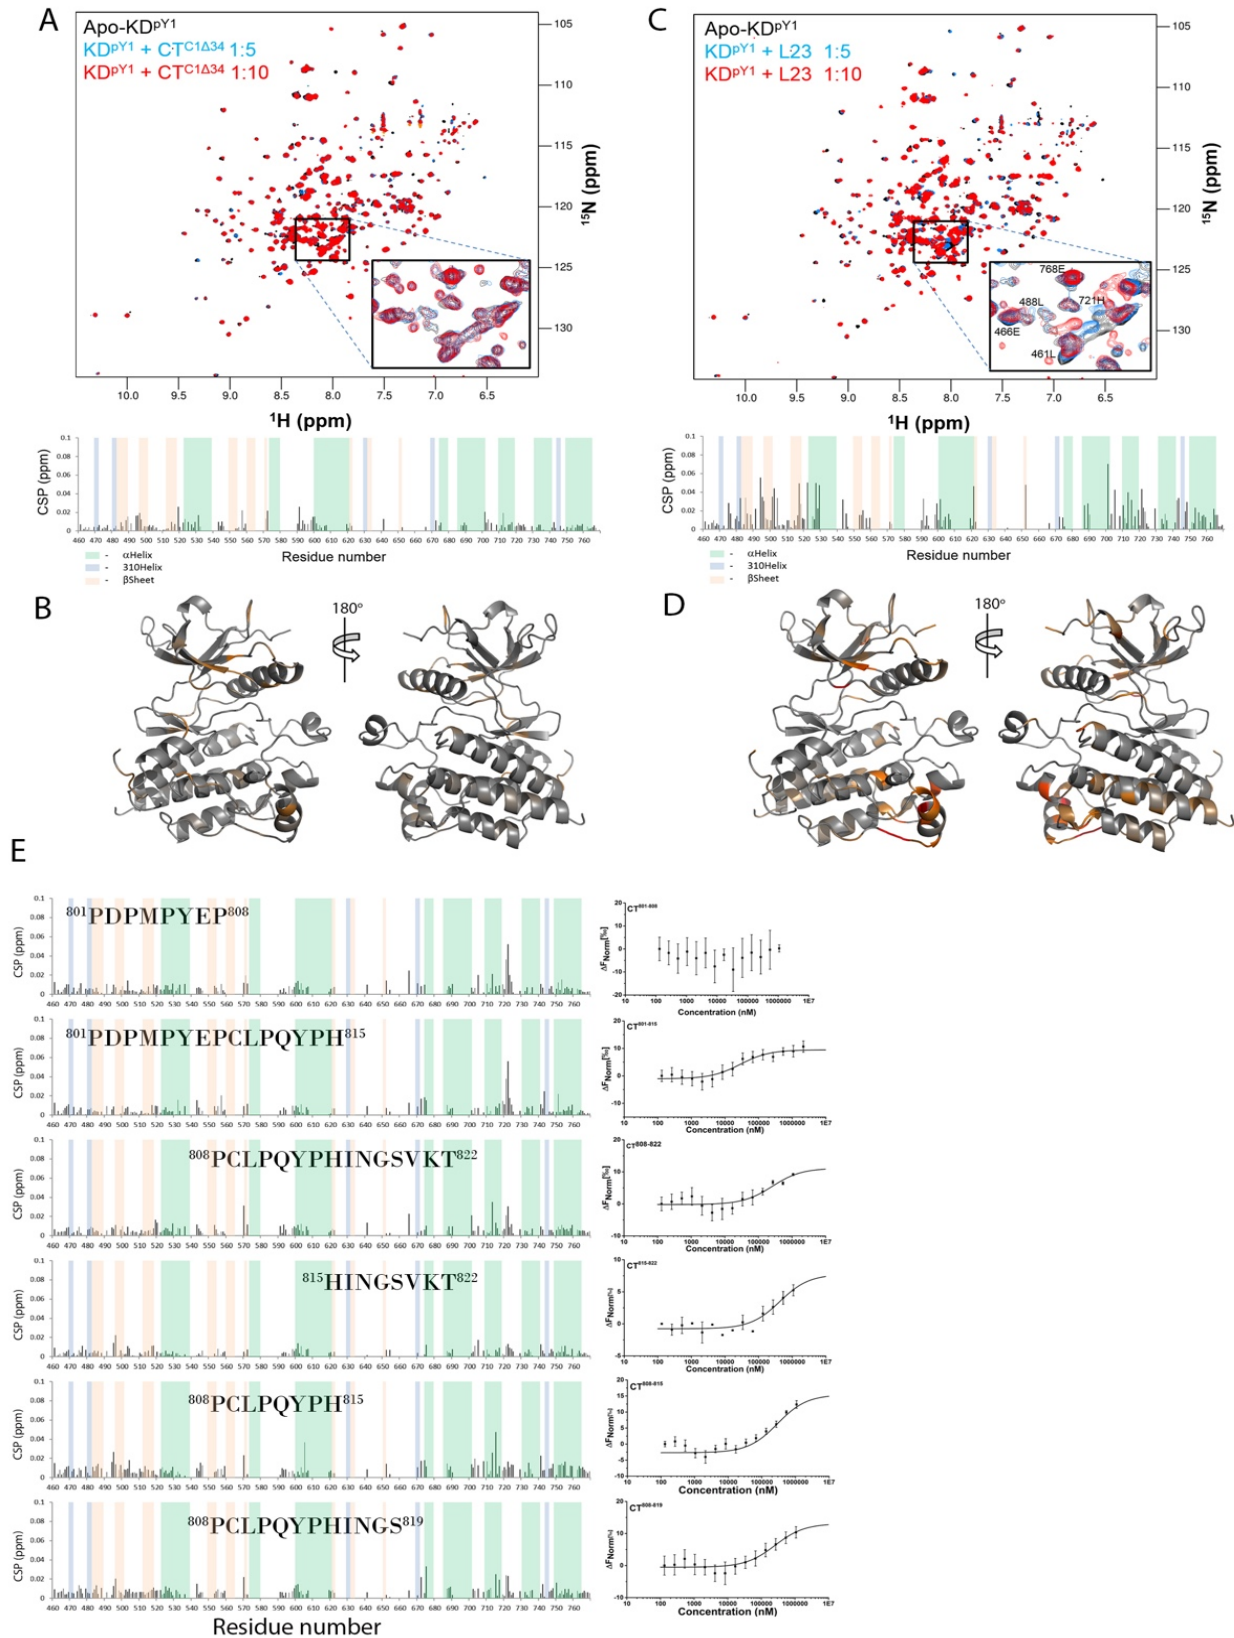

64 **Fig. S3. CT<sup>C1</sup> fragments bind to KD<sup>pY1</sup>.** (A) The first 24 residues (CT<sup>C1Δ34</sup>) of CT shows negligible  
65 interaction with <sup>15</sup>N-labelled KD<sup>pY1</sup>. There is no significant CSPs observed in the HSQC spectra and  
66 calculated CSPs. (B) Mapping of the weak CSPs from CT<sup>C1Δ34</sup> binding on the KD<sup>pY1</sup> crystal structure. (C)  
67 The last 23 residues (Last 23, L23) of CT shows major interaction with <sup>15</sup>N-labelled KD<sup>pY1</sup>. Upon L23  
68 binding, CSPs were observed in the HSQC spectra and calculated CSPs shows two clusters of residues  
69 can respond to L23 peptide binding. (D) Mapping of the CSPs from L23 binding on the KD<sup>pY1</sup> crystal  
70 structure. (E) Using small CT peptides (801-808, 801-815, 808-822, 815-822, 808-815, and 808-819.  
71 Sequences are shown in the Figure) for HSQC titration with <sup>15</sup>N-labelled KD<sup>pY1</sup> in order to narrow down  
72 sequence-specific binding region on kinase. The binding of each peptide to KD<sup>pY1</sup> was also confirmed  
73 using MST as shown on the right.

74  
75  
76  
77  
78  
79  
80  
81  
82  
83  
84  
85  
86  
87  
88

## Supplemental Figure 4

A

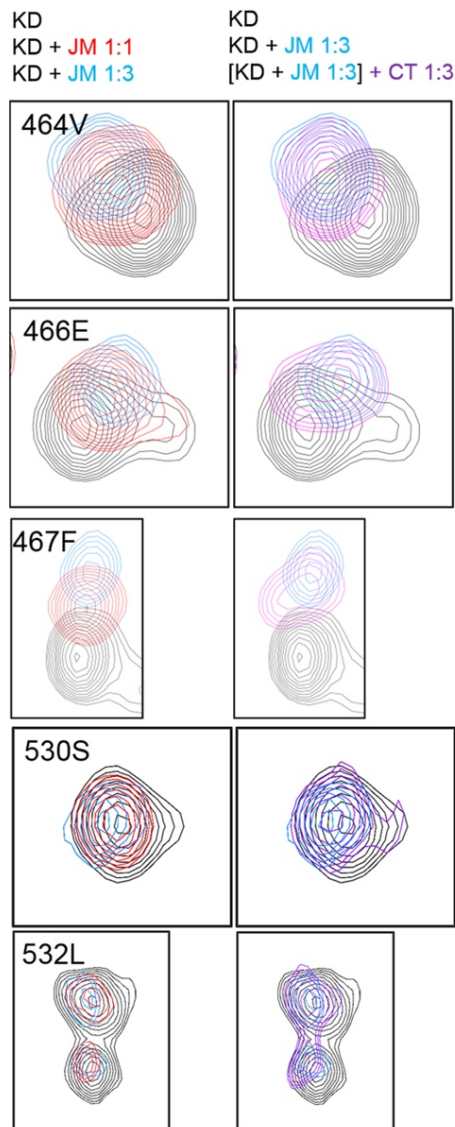

89

90 **Fig. S4. Binding of CT does not compete with JM for binding to KD<sup>pY1</sup>.** (A) <sup>15</sup>N-labelled KD<sup>pY1</sup> was  
91 titrated with 1:1 and 1:3 ratio of JM first. CSPs of selected residues were shown (the left hand panel. Apo,  
92 black; 1:1, red; 1:3, blue). The addition of 1:3 ratio of CT into the preformed JM-<sup>15</sup>N-labelled KD<sup>pY1</sup>  
93 shows the reduction of CSPs (Right panel; Apo, black; 1 x KD : 3 x JM, blue; [1 x KD : 3 x JM]+3 x CT,  
94 purple).

95



## Supplemental Figure 5

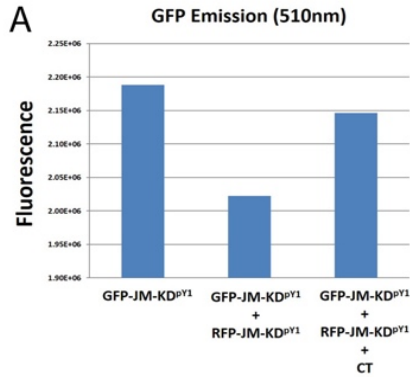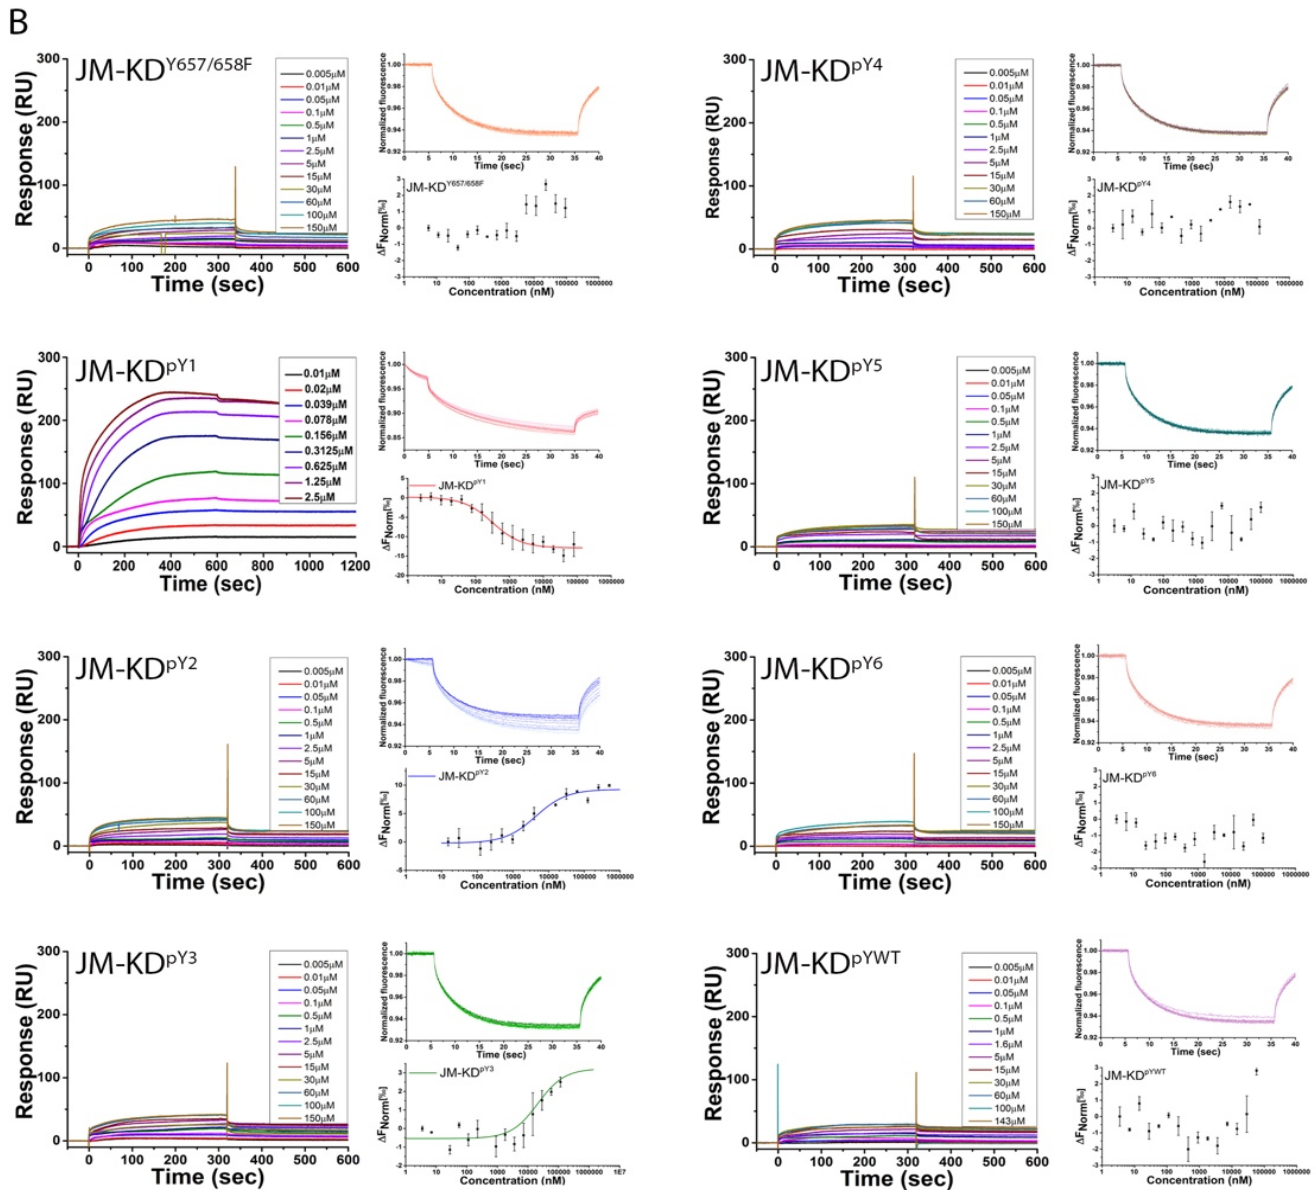

97 **Fig. S5. Phosphorylation states control KD and CT<sup>C1</sup> interaction.** (A) Steady-state FRET study using  
98 GFP and RFP tagged JM-KD<sup>pY1</sup> demonstrates that the dimer formation of GFP and RFP tagged JM-KD<sup>pY1</sup>  
99 as indicated by the decrease of FRET donor emission (510nm). In addition, the binding of CT to JM-  
100 KD<sup>pY1</sup> results in the dissociation of the asymmetric JM-KD<sup>pY1</sup> dimer as indicated by the recovery of FRET  
101 donor emission (510nm). (B) The phosphorylation levels of JM-KD tightly control the interaction with  
102 CT. For the SPR experiments, untagged CT (the last 58 residues of FGFR2) was immobilised on a CM4  
103 chip via amine coupling. Kinases with different phosphorylation level (JM-KD<sup>pY1</sup> to JM-KD<sup>pY6</sup>, and JM-  
104 KD<sup>pYWT</sup>, and JM-KD<sup>Y657/658F</sup>) were injected followed by a buffer wash. The binding affinities were  
105 determined using steady-state fitting. For the MST measurements, untagged CT was labelled by Atto 488.  
106 Two-fold serial dilutions of kinase proteins as described above were used to mix with labelled CT (100nM)  
107 and the binding affinities were determined. Both SPR and MST experiments show that the mono-  
108 phosphorylated JM-KD is the strongest binding partner for the CT. These experiments provide direct  
109 evidence of KD-CT interaction at the basal state.

110

111

112

113

114

## Supplemental Figure 6

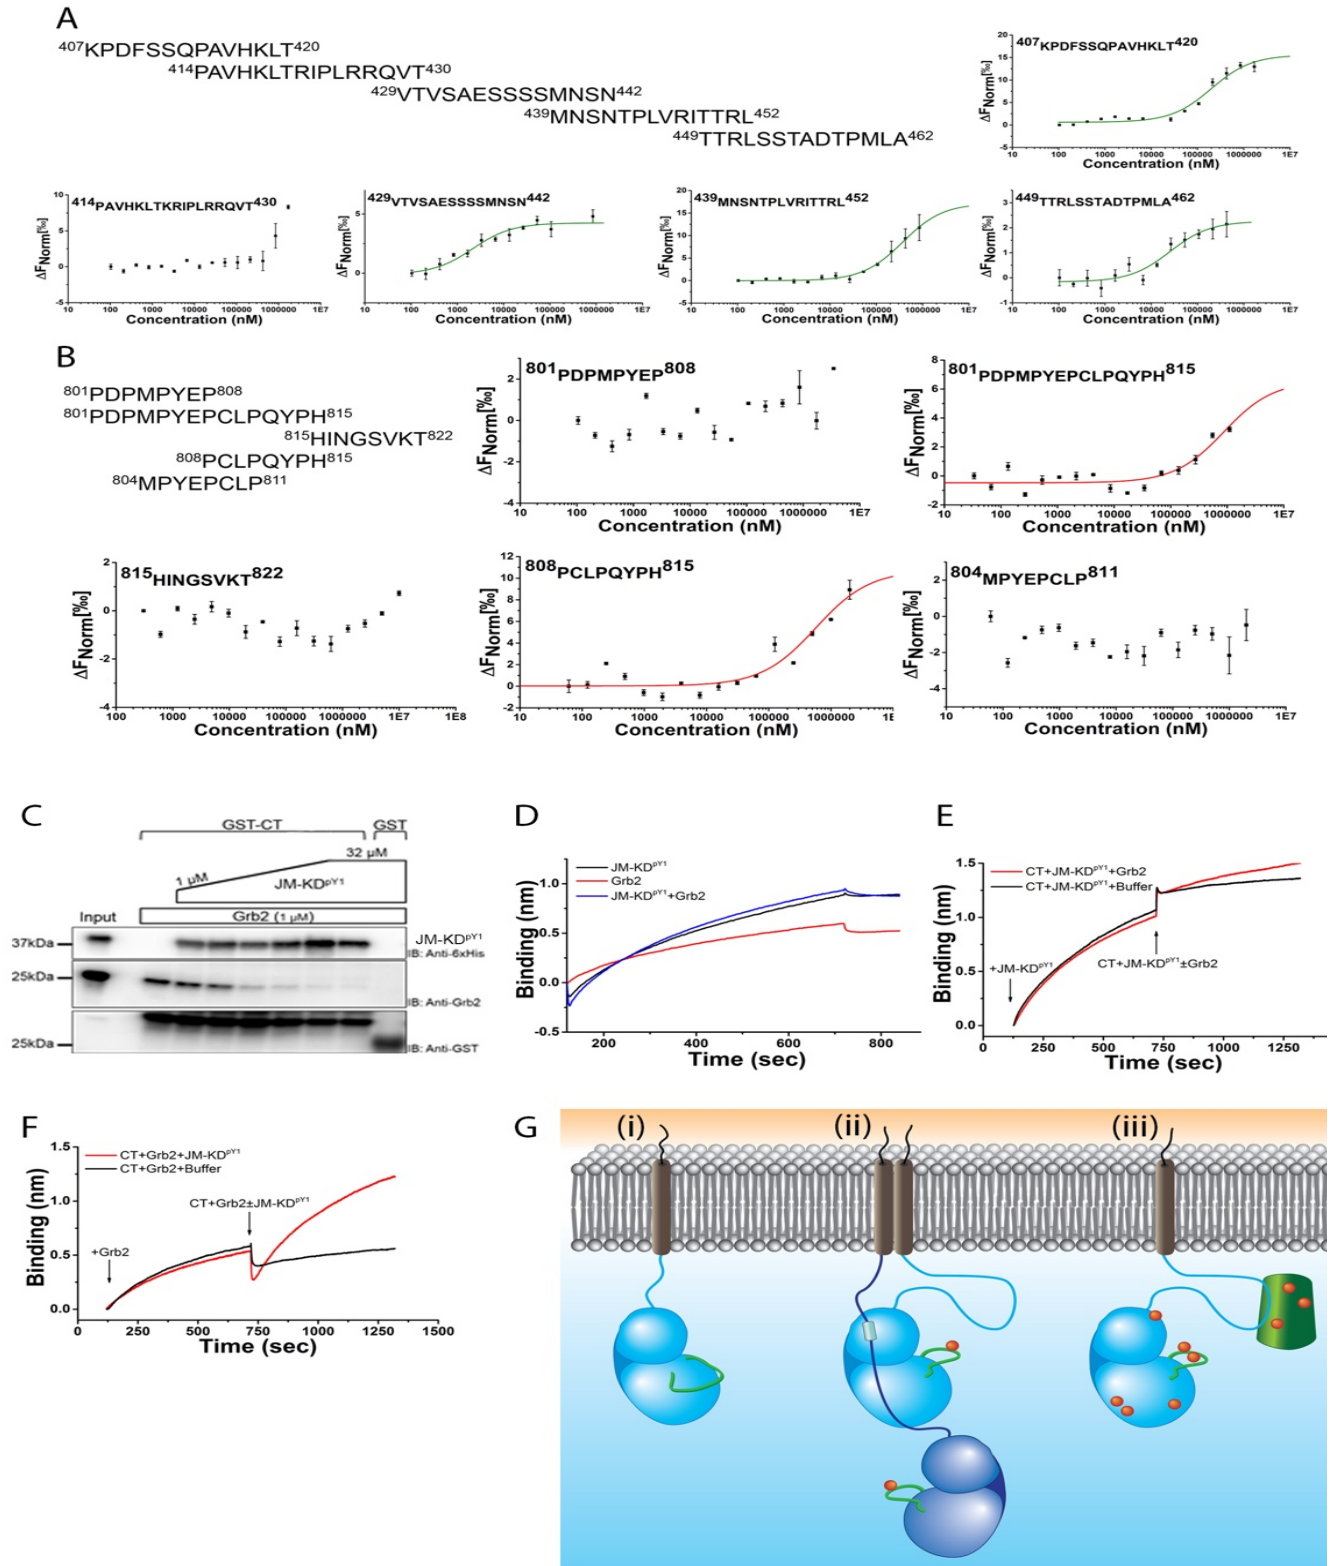

116 **Fig. S6. CT-JM interactions and CT competes with GRB2 for binding to JM-KD<sup>P<sup>Y1</sup></sup>.** (A) Small JM  
117 peptides (residues 407-420, 414-430, 429-442, 439-452, and 449-462) were used for the MST  
118 measurements with CT. CT was labelled with Atto 488 and 2-fold serial dilutions of small JM peptides  
119 were mixed with 100 nM labelled CT. (B) Small CT peptides (residues 801-808, 801-815, 815-822, 808-  
120 815, and 804-811) were used for the MST measurements with JM. JM was labelled with Atto488 and 2-  
121 fold serial dilutions of small CT peptides were mixed with 100 nM labelled JM. (C) GST-CT was used to  
122 pulldown GRB2 (1  $\mu$ M) alone or GRB2 (1  $\mu$ M) mixed with increased concentrations of JM-KD<sup>P<sup>Y1</sup></sup> (1  $\mu$ M  
123 to 32  $\mu$ M). In the absence of JM-KD<sup>P<sup>Y1</sup></sup>, GRB2 can be recruited to CT. However, binding of JM-KD<sup>P<sup>Y1</sup></sup> to  
124 CT competes with GRB2 binding to CT as less Grb2 binds to CT in the presence of JM-KD<sup>P<sup>Y1</sup></sup> in a  
125 concentration-dependent manner. (D) BLI sensors captured with CT show different binding behaviours  
126 upon 10 $\mu$ M of JM-KD<sup>P<sup>Y1</sup></sup> (black) and GRB2 (red) binding. However, the binding curve for the JM-KD<sup>P<sup>Y1</sup></sup>-  
127 GRB2 mixture shows similar curve (blue) to that of JM-KD<sup>P<sup>Y1</sup></sup> alone (black), suggesting that in the  
128 presence of JM-KD<sup>P<sup>Y1</sup></sup> GRB2 cannot bind to CT as the CT- JM-KD<sup>P<sup>Y1</sup></sup> complex is preferable. (E) GRB2  
129 does not compete with JM-KD<sup>P<sup>Y1</sup></sup> for binding to CT. CT was captured on a BLI sensor and exposed JM-  
130 KD<sup>P<sup>Y1</sup></sup> at 125 s (arrow) for 625 s, the level of bound JM-KD<sup>P<sup>Y1</sup></sup> (10  $\mu$ M solution in the sample well) on  
131 CT was shown as the increase of Binding signal (nm). After adding GRB2 (10  $\mu$ M solution in the sample  
132 well) at 750 s as indicated by an arrow, no significant changes can be observed compared with buffer  
133 control (Grb2 addition, red; buffer addition, black). (F) JM-KD<sup>P<sup>Y1</sup></sup> competes with GRB2 for binding to  
134 CT. CT was captured on a BLI sensor and exposed GRB2 at 125 s (arrow) for 625 s, the level of bound  
135 GRB2 (10  $\mu$ M solution in the sample well) on the CT was shown as the increase of Binding signal (nm).  
136 After adding JM-KD<sup>P<sup>Y1</sup></sup> (10  $\mu$ M solution in the sample well) at 750 s as indicated by the arrow, a  
137 significant drop in the signal following by a graduate increase in signal compared with buffer control (JM-  
138 KD<sup>P<sup>Y1</sup></sup> addition, red; buffer addition, black) indicating that JM-KD<sup>P<sup>Y1</sup></sup> competes with GRB2 for binding  
139 to CT. (G) Schematic representation of activation of FGFR2<sup>C3</sup> *Ksam* mutant. i: In the absence of  
140 stimulation the unphosphorylated FGFR2<sup>C3</sup> (light blue, JM light blue line) can exist as a monomer freely  
141 diffusing through the plasma membrane. ii: Under normal expression levels in non-stimulated cells  
142 FGFR2 will self-associate through random collision. Such collision between FGFR2<sup>C3</sup> molecules in the  
143 absence of negative control of CT results in formation A-loop phosphorylation (red spot on green line) of  
144 JM latch and asymmetric dimerization to form active enzyme. (Enzyme-like receptor: dark blue, substrate-  
145 like receptor: light blue). iii) Active asymmetric dimerization leads to trans-autophosphorylation (red  
146 spots) of FGFR2<sup>C3</sup> which is unrestrained by CT. The conformational change associated with  
147 phosphorylation of the KD enables recruitment and phosphorylation of FRS2 (green shape) and  
148 recruitment of downstream signalling effector proteins to initiate signal transduction.  
149  
150  
151  
152  
153  
154  
155  
156  
157  
158  
159  
160  
161



**Table S1. Biophysical measurements of FGFR2 JM, KD, and CT interactions.**

| <b>FGFR2-derived polypeptides binding to JM (<math>K_d</math>) measured by MST</b> |                    |
|------------------------------------------------------------------------------------|--------------------|
| KD <sup>K518I</sup>                                                                | 13.4±0.994 $\mu$ M |
| KD <sup>pY1</sup>                                                                  | 2.51±0.203 $\mu$ M |
| KD <sup>pY2</sup>                                                                  | 6.98±0.877 $\mu$ M |
| KD <sup>pY4</sup>                                                                  | 10.2±1.33 $\mu$ M  |
| KD <sup>pY6</sup>                                                                  | 22.5±1.8 $\mu$ M   |
| KD <sup>pWT</sup>                                                                  | 20.5±2.04 $\mu$ M  |
| <b>JM sequences binding to KD<sup>pY1</sup> (<math>K_d</math>) measured by MST</b> |                    |
| <sup>407</sup> juxtamembrane region <sup>462</sup>                                 | 2.51±0.203 $\mu$ M |
| <sup>407</sup> KPDFSSQPAVHKLT <sup>420</sup>                                       | 105±7.37 $\mu$ M   |
| <sup>414</sup> PAVHKLTKRIPLRRQVT <sup>430</sup>                                    | 36.8±6.23 $\mu$ M  |
| <sup>429</sup> VTVSAESSSSMNSN <sup>442</sup>                                       | > 1000 $\mu$ M     |
| <sup>439</sup> MNSNTPLVRITTRL <sup>452</sup>                                       | No binding         |
| <sup>449</sup> TTRLSSTADTPMLA <sup>462</sup>                                       | No binding         |
| <b>CT sequences binding to KD<sup>pY1</sup> (<math>K_d</math>) measured by MST</b> |                    |
| <sup>801</sup> PDPMPYEP <sup>808</sup>                                             | No binding         |
| <sup>801</sup> PDPMPYEPCLPQYPH <sup>815</sup>                                      | 25.8±5.4 $\mu$ M   |
| <sup>808</sup> PCLPQYPHINGSVKT <sup>822</sup>                                      | 257±39.2 $\mu$ M   |
| <sup>815</sup> HINGSVKT <sup>822</sup>                                             | 426±42.5 $\mu$ M   |
| <sup>808</sup> PCLPQYPH <sup>815</sup>                                             | 291±21.4 $\mu$ M   |
| <sup>808</sup> PCLPQYPHINGS <sup>819</sup>                                         | 255±37.9 $\mu$ M   |

| <b>FGFR2-derived polypeptides binding to CT<sup>C1</sup> (μM) measured by SPR</b> |               | <b>SE(Kd)</b> |
|-----------------------------------------------------------------------------------|---------------|---------------|
| JM-KD <sup>Y657/658F</sup>                                                        | 5.657E-3      | 1.9E-3        |
| JM-KD <sup>pY1</sup>                                                              | 1.652E-4      | 1.6E-5        |
| JM-KD <sup>pY2</sup>                                                              | 4.075E-3      | 5.2E-4        |
| JM-KD <sup>pY3</sup>                                                              | 3.266E-3      | 8.2E-4        |
| JM-KD <sup>pY4</sup>                                                              | 7.873E-3      | 1.7E-3        |
| JM-KD <sup>pY5</sup>                                                              | 1.596E-3      | 2.0E-4        |
| JM-KD <sup>pY6</sup>                                                              | 4.632E-3      | 9.1E-4        |
| JM-KD <sup>pWT</sup>                                                              | 2.309E-3      | 4.8E-4        |
| <b>JM sequences binding to CT<sup>C1</sup> (K<sub>d</sub>) measured by MST</b>    |               |               |
| <sup>407</sup> juxtamembrane region <sup>462</sup>                                | 20.2±2.92 μM  |               |
| <sup>407</sup> KPDFSSQPAVHKLT <sup>420</sup>                                      | 200±13.7 μM   |               |
| <sup>414</sup> PAVHKLTKRIPLRRQVT <sup>430</sup>                                   | No binding    |               |
| <sup>429</sup> VTVSAESSSSMNSN <sup>442</sup>                                      | 3.23±0.326 μM |               |
| <sup>439</sup> MNSNTPLVRITTRL <sup>452</sup>                                      | 372±30.3 μM   |               |
| <sup>449</sup> TTRLSSTADTPMLA <sup>462</sup>                                      | 25.4±3.26 μM  |               |
| <b>CT<sup>C1</sup> sequences binding to JM (K<sub>d</sub>) measured by MST</b>    |               |               |
| <sup>801</sup> PDPMPYEP <sup>808</sup>                                            | No binding    |               |
| <sup>801</sup> PDPMPYEPCLPQYPH <sup>815</sup>                                     | 63.6±6.5 μM   |               |
| <sup>815</sup> HINGSVKT <sup>822</sup>                                            | No binding    |               |
| <sup>808</sup> PCLPQYPH <sup>815</sup>                                            | 56.6±5.5 μM   |               |
| <sup>804</sup> MPYEPCL <sup>P811</sup>                                            | No binding    |               |

163  
164  
165

**Table S2. Statistic parameters of SAXS experiments for KD<sup>PY1</sup> and JM- KD<sup>PY1</sup>.**

| <b>KD<sup>PY1</sup> conc \ multi</b>    | <b>Single-state<br/>(<math>\chi^2</math> / model)</b> | <b>Two-state<br/>(<math>\chi^2</math> / models<br/>[weight])</b>                                                                                                                | <b>Three-state<br/>(<math>\chi^2</math> / models<br/>[weight])</b>                                                                                                                                                                     |
|-----------------------------------------|-------------------------------------------------------|---------------------------------------------------------------------------------------------------------------------------------------------------------------------------------|----------------------------------------------------------------------------------------------------------------------------------------------------------------------------------------------------------------------------------------|
| 2.5 mg/ml                               | <b>2.24</b> / KD21<br><b>12.71</b> / <i>2PSQ</i>      | <b>2.13</b> / 2CLY [0.410];<br>mono [0.590]<br><b>4.21</b> / <i>2PSQ</i> [0.307];<br><i>mono</i> [0.693]<br><b>3.94</b> / <u>KI3mer</u><br>[0.105]; <u>mono</u><br>[0.895]      | <b>1.00</b> / KD05 [0.246];<br>KD04 [0.266]; mono<br>[0.488]<br><b>1.35</b> / <i>2PSQ</i> [0.305];<br><i>KI</i> [0.171];<br><i>mono</i> [0.524]<br><b>1.29</b> / <u>2PSQ</u> [0.203];<br><u>NC3mer</u> [0.081];<br><u>mono</u> [0.715] |
| 5.0 mg/ml                               | <b>4.18</b> / KD21<br><b>36.12</b> / <i>2PSQ</i>      | <b>4.92</b> / KD28 [0.613];<br>mono [0.387]<br><b>14.81</b> / <i>2PSQ</i><br>[0.438]; <i>mono</i><br>[0.562]<br><b>14.47</b> / <u>KI3mer</u><br>[0.117]; <u>mono</u><br>[0.883] | <b>1.76</b> / KD05 [0.311];<br>KD04 [0.294]; mono<br>[0.396]<br><b>2.66</b> / <i>2PSQ</i> [0.392];<br><i>KI</i> [0.184];<br><i>mono</i> [0.424]<br><b>2.36</b> / <u>2PSQ</u> [0.276];<br><u>NC3mer</u> [0.088];<br><u>mono</u> [0.635] |
| 8.0 mg/ml                               | <b>7.18</b> / CP21<br><b>60.01</b> / <i>2PSQ</i>      | <b>9.74</b> / CP28 [0.718];<br>mono [0.282]<br><b>25.63</b> / <i>2PSQ</i><br>[0.492]; <i>mono</i><br>[0.508]<br><b>26.11</b> / <u>2PSQ</u><br>[0.492]; <u>mono</u><br>[0.508]   | <b>2.89</b> / CP05 [0.374];<br>CP04 [0.300]; mono<br>[0.325]<br><b>4.71</b> / <i>2PSQ</i> [0.463];<br><i>KI</i> [0.184];<br><i>mono</i> [0.352]<br><b>4.26</b> / <u>2PSQ</u> [0.339];<br><u>NC3mer</u> [0.089];<br><u>mono</u> [0.572] |
| <b>JM-KD<sup>PY1</sup> conc \ multi</b> | <b>Single-state<br/>(<math>\chi^2</math> / model)</b> | <b>Two-state<br/>(<math>\chi^2</math> / models<br/>[weight])</b>                                                                                                                | <b>Three-state<br/>(<math>\chi^2</math> / models<br/>[weight])</b>                                                                                                                                                                     |
| 2.5 mg/ml                               | <b>15.30</b> / JM-KD13                                | <b>2.14</b> / 3CLY [0.154];<br>mono [0.846]                                                                                                                                     | <b>1.40</b> / JM-KD04<br>[0.219]; JM-KD03<br>[0.128]; mono<br>[0.652]                                                                                                                                                                  |

|           |                         |                                                 |                                                                       |
|-----------|-------------------------|-------------------------------------------------|-----------------------------------------------------------------------|
| 5.0 mg/ml | <b>48.70</b> / JM-KD13  | <b>4.98</b> / 3CLY [0.153];<br>mono [0.847]     | <b>2.48</b> / JM-KD04<br>[0.218]; JM-KD03<br>[0.125]; mono<br>[0.658] |
| 8.0 mg/ml | <b>122.05</b> / JM-KD13 | <b>10.78</b> / 3CLY<br>[0.141]; mono<br>[0.859] | <b>3.04</b> / JM-KD04<br>[0.206]; JM-KD03<br>[0.111]; mono<br>[0.684] |

166 Top: Analysis of KD<sup>P</sup><sup>Y1</sup>. KD04: symmetric dimer, formed through C-lobes. KD05: a docked dimer  
 167 arrangement corresponding to the dimer observed in PDB 2PSQ. KD21: compact asymmetric  
 168 dimer from ClusPro2.0; the C-lobe of one kinase binds to N- and C-lobes of the receiver kinase.  
 169 KD28: compact asymmetric dimer from ClusPro2.0; similar to CP21. 3CLY: asymmetric dimer  
 170 based on PDB 3CLY (kinase C-tail phosphorylation). Mono: monomer, produced by Swiss-Model  
 171 based on PDB 2PVF. NC3mer: trimer produced by combining a 2PSQ dimer with a NC dimer.  
 172 KI3mer: trimer produced by combining a 2PSQ dimer with a KI dimer. The normal script, italics  
 173 and underlining correspond to results based on using different pools as source for multimers.  
 174 Normal script: using all monomeric and dimeric models, including *in silico* docked dimers and  
 175 aggregates. Italics: using only monomeric and dimeric species present in crystal structures of  
 176 FGFR1 1Y mutants. Underlined: using only monomeric, dimeric and trimeric species present in  
 177 crystal structures of FGFR1 1Y mutants. For all Pools, the 3-state models fitted the experimental  
 178 SAXS data significantly better than single or 2-state models (4-state models did not result in  
 179 significant improvements and were not included), suggesting that at least 3 species co-exist in  
 180 solution.

181 Bottom: Analysis of JM-KD<sup>P</sup><sup>Y1</sup>. JM-KD03: two kinases are loosely connected through their  
 182 juxtamembrane region. JM-KD04: asymmetric dimer, where the juxtamembrane region of the  
 183 effector kinase latches onto the receiver kinase. JM-KD13: asymmetric dimer, where the  
 184 juxtamembrane region of the effector kinase latches onto the receiver kinase. 3CLY: asymmetric  
 185 dimer based on PDB id 3CLY (kinase C-tail phosphorylation). Mono: monomer, produced by  
 186 Modeller based on PDB 2PVF. Model structures were selected from a pool including crystal  
 187 structure-derived and *in silico*-docked dimeric and multimeric assemblies (55 different structures  
 188 in total).

189  
190  
191 **Table S3. X-ray data collection and refinement statistics.**

| Data collection | FGFR2IIIb (414-822), pY657 (PDB6V6Q)           |
|-----------------|------------------------------------------------|
| Beam line       | ALS 8.3.1                                      |
| Wavelength (Å)  | 1.116                                          |
| Space group     | P 2 <sub>1</sub> 2 <sub>1</sub> 2 <sub>1</sub> |



|                                              |                                         |
|----------------------------------------------|-----------------------------------------|
| <b>Cell dimensions</b>                       |                                         |
| <i>a</i> , <i>b</i> , <i>c</i> (Å)           | 64.0 86.5 254.2                         |
| <b>Resolution</b> (Å)                        | 81.92 - 2.46 (2.55 - 2.46) <sup>a</sup> |
| <b>R<sub>merge</sub></b> (%)                 | 9.8 (108.8) <sup>a</sup>                |
| <b>I/σ(I)</b>                                | 12.7 (1.8) <sup>a</sup>                 |
| <b>CC<sub>1/2</sub></b>                      | 0.998 (0.326)                           |
| <b>Completeness</b> (%)                      | 96.6 (80.3) <sup>b</sup>                |
| <b>Redundancy</b>                            | 6.7 (3.6) <sup>a</sup>                  |
| <b>Refinement</b>                            |                                         |
| <b>Resolution</b> (Å)                        | 81.92 - 2.46 (2.55 - 2.46) <sup>a</sup> |
| <b>Number of reflections</b>                 | 50447 (5926)                            |
| <b>R<sub>work</sub>/R<sub>free</sub></b> (%) | 21.14/23.88                             |
| <b>Number of atoms</b>                       |                                         |
| <b>Protein</b>                               | 9,018                                   |
| <b>Ligands</b>                               | 124                                     |
| <b>Water</b>                                 | 125                                     |
| <b>Average B factors</b> (Å <sup>2</sup> )   |                                         |
| <b>Protein</b>                               | 83.82                                   |
| <b>Ligands</b>                               | 49.06                                   |
| <b>Water</b>                                 | 4                                       |
| <b>Rmsds</b>                                 |                                         |
| <b>Bond lengths</b> (Å)                      | 0.018                                   |
| <b>Bond angles</b> (°)                       | 0.098                                   |

Statistics for the highest-resolution shell are shown in parentheses.

194

195

**Table S4. Proline mutants in RTK C-terminal tails and human cancers.**

| <b>Receptor</b>         | <b>Cancer</b>                                   | <b>Mutation</b> | <b>Sequences</b> |
|-------------------------|-------------------------------------------------|-----------------|------------------|
| IGF1R                   | Cutaneous Melanoma                              | <i>P1304H</i>   | <b>PLDP</b>      |
|                         | Lung Squamous Cell Carcinoma                    | <i>P1290L</i>   | PE <b>P</b>      |
|                         | Uterine Endometrioid Carcinoma                  | <i>Q1344*</i>   | Truncation       |
| InsR                    | Cutaneous Melanoma                              | <i>P1381S</i>   | PRSN <b>P</b>    |
|                         | Cutaneous Melanoma                              | <i>P1328T</i>   | <b>PLDR</b>      |
|                         | Glioblastoma Multiforme                         | <i>P1328S</i>   | <b>PLDR</b>      |
| c-kit                   | Mucinous Adenocarcinoma of the Colon and Rectum | <i>R946*</i>    | Truncation       |
| CSF1R                   | Diffuse Type Stomach Adenocarcinoma             | <i>P966L</i>    | PLLQ <b>P</b>    |
|                         | Leiomyosarcoma                                  | <i>P962S</i>    | <b>PLLQP</b>     |
|                         | Lung Adenocarcinoma                             | <i>E912*</i>    | Truncation       |
|                         | Lung Squamous Cell Carcinoma                    | <i>Q911*</i>    | Truncation       |
| PDGFRA                  | Glioblastoma Multiforme                         | <i>P1021L</i>   | <b>PLPDIDP</b>   |
| PDGFRB                  | Cutaneous Melanoma                              | <i>P1042S</i>   | PLEG <b>SP</b>   |
|                         | Cutaneous Melanoma                              | <i>P1042S</i>   | PLEG <b>SP</b>   |
|                         | Cutaneous Melanoma                              | <i>P1042L</i>   | PLEG <b>SP</b>   |
|                         | Cutaneous Melanoma                              | <i>P983Q</i>    | SDH <b>P</b>     |
| FLT4                    | Uterine Endometrioid Carcinoma                  | <i>E1294*</i>   | Truncation       |
| VEGFR2                  | Endometrioid Carcinoma                          | <i>P1355A</i>   | SS <b>PP</b>     |
|                         | Uterine Endometrioid Carcinoma                  | <i>E1325*</i>   | Truncation       |
|                         | Lung Adenocarcinoma                             | <i>E1323*</i>   | Truncation       |
|                         | Hepatocellular Carcinoma                        | <i>Y1319*</i>   | Truncation       |
|                         | Lung Squamous Cell Carcinoma                    | <i>P1280T</i>   | <b>PSFGGMVP</b>  |
|                         | Cutaneous Melanoma                              | <i>P1243S</i>   | <b>PSFGGMVP</b>  |
|                         | Cervical Squamous Cell Carcinoma                | <i>R1229*</i>   | Truncation       |
|                         | Rectal Adenocarcinoma                           | <i>R1229*</i>   | Truncation       |
|                         | Bladder Urothelial Carcinoma                    | <i>Q1222*</i>   | Truncation       |
|                         | Cutaneous Melanoma                              | <i>P1210S</i>   | <b>PKFH</b>      |
| Prostate Adenocarcinoma | <i>Q1170*</i>                                   | Truncation      |                  |
| FGFR1                   | Cutaneous Melanoma                              | <i>E792*</i>    | Truncation       |
| FGFR2                   | Prostate Adenocarcinoma                         | <i>P813T</i>    | PQ <b>YP</b>     |
|                         | Cutaneous Melanoma                              | <i>P775L</i>    | <b>PLEQYS</b>    |

|       |                                       |               |                  |
|-------|---------------------------------------|---------------|------------------|
|       | Uterine Endometrioid Carcinoma        | <i>Y769*</i>  | Truncation       |
|       | Uterine Endometrioid Carcinoma        | <i>Y769*</i>  | Truncation       |
| FGFR4 | Head and Neck Squamous Cell Carcinoma | <i>P788L</i>  | PLPL             |
|       | Cutaneous Melanoma                    | <i>P763R</i>  | PYSP             |
| NTRK1 | Cutaneous Melanoma                    | <i>P789T</i>  | PPVY             |
| ROR1  | Cutaneous Melanoma                    | <i>P883H</i>  | PLLP             |
|       | Cutaneous Melanoma                    | <i>P856Q</i>  | PPKSRSP          |
|       | Cutaneous Melanoma                    | <i>P826S</i>  | PINGYPIPP        |
|       | Lung Adenocarcinoma                   | <i>P826L</i>  | PINGYPIPP        |
|       | Cutaneous Melanoma                    | <i>P825S</i>  | PINGYPIPP        |
|       | Cutaneous Melanoma                    | <i>P818S</i>  | PINGYPIPP        |
|       | Uterine Endometrioid Carcinoma        | <i>R815*</i>  | Truncation       |
|       | Uterine Mixed Endometrial Carcinoma   | <i>R815*</i>  | Truncation       |
|       | Cutaneous Melanoma                    | <i>P811H</i>  | PPIP             |
|       | Tubular Stomach Adenocarcinoma        | <i>P808L</i>  | PPIP             |
|       | Glioblastoma Multiforme               | <i>P761H</i>  | PSGG             |
| ROR2  | Head and Neck Squamous Cell Carcinoma | <i>P901T</i>  | PEDG             |
|       | Cutaneous Melanoma                    | <i>P878L</i>  | PSNT             |
|       | Esophageal Squamous Cell Carcinoma    | <i>P853T</i>  | PQQVPPQMVP<br>KP |
|       | Uterine Endometrioid Carcinoma        | <i>P839L</i>  | PNFYPVQIP        |
|       | Uterine Endometrioid Carcinoma        | <i>P826L</i>  | PVP              |
|       | Hepatocellular Carcinoma              | <i>Q816*</i>  | Truncation       |
|       | Head and Neck Squamous Cell Carcinoma | <i>P813T</i>  | RPMVPPP          |
|       | Cutaneous Melanoma                    | <i>P803L</i>  | PQQQFIP          |
|       | Bladder Urothelial Carcinoma          | <i>P794A</i>  | APFPQPQ          |
|       | Lung Adenocarcinoma                   | <i>Y786*</i>  | Truncation       |
| MET   | Bladder Urothelial Carcinoma          | <i>S1390*</i> | Truncation       |
|       | Uterine Endometrioid Carcinoma        | <i>R1382*</i> | Truncation       |
|       | Cutaneous Melanoma                    | <i>P1366S</i> | PYPS             |
| AXL   | Cutaneous Melanoma                    | <i>P848S</i>  | PPTQDP           |
|       | Cutaneous Melanoma                    | <i>P848L</i>  | PPTQDP           |
| c-MER | Stomach Adenocarcinoma                | <i>W938*</i>  | Truncation       |

|       |                                                             |                                    |             |
|-------|-------------------------------------------------------------|------------------------------------|-------------|
|       | Lung Squamous Cell Carcinoma                                | <i>L858*</i>                       | Truncation  |
| TYRO3 | Head and Neck Squamous Cell Carcinoma                       | <i>Q866*</i>                       | Truncation  |
|       | Papillary Thyroid Cancer                                    | <i>G854*</i>                       | Truncation  |
|       | Cutaneous Melanoma                                          | <i>G816*</i>                       | Truncation  |
|       | Breast Invasive Ductal Carcinoma                            | <i>P813L</i>                       | EEP         |
| EphA1 | Head and Neck Squamous Cell Carcinoma                       | <i>Q955*</i>                       | Truncation  |
|       | Head and Neck Squamous Cell Carcinoma                       | <i>Y930*</i>                       | Truncation  |
|       | Uterine Endometrioid Carcinoma                              | <i>P914L</i>                       | PSSL        |
| EphA3 | Lung Adenocarcinoma                                         | <i>P961R</i>                       | PQKK        |
| EphA4 | Hepatocellular Carcinoma                                    | <i>P985H</i>                       | MVPV        |
|       | Cutaneous Melanoma                                          | <i>Q948*</i>                       | Truncation  |
| EphA5 | Lung Adenocarcinoma                                         | <i>P1036T</i>                      | VPL         |
|       | Lung Adenocarcinoma                                         | <i>P1036L</i>                      | VPL         |
|       | Uterine Endometrioid Carcinoma                              | <i>E1025*</i>                      | Truncation  |
|       | Cervical Squamous Cell Carcinoma                            | <i>Q1024*</i>                      | Truncation  |
|       | Lung Squamous Cell Carcinoma                                | <i>E984*</i>                       | Truncation  |
|       | Lung Squamous Cell Carcinoma                                | <i>P961T</i>                       | PLG         |
|       | Lung Squamous Cell Carcinoma<br>Cutaneous Melanoma          | <i>X951_splice</i><br><i>P939L</i> | PSS         |
| EphA6 | Colon Adenocarcinoma                                        | <i>R1108*</i>                      |             |
|       | Rectal Adenocarcinoma                                       | <i>P1052L</i>                      | PESPGEVPEYP |
|       | Diffuse Large B-Cell Lymphoma, NOS                          | <i>P1052L</i>                      | PESPGEVPEYP |
|       | Stomach Adenocarcinoma                                      | <i>P1052L</i>                      | PESPGEVPEYP |
|       | Lung Squamous Cell Carcinoma                                | <i>W1007*</i>                      | Truncation  |
|       | Cutaneous Melanoma                                          | <i>P992S</i>                       | PAPMGCP     |
|       | Lung Adenocarcinoma                                         | <i>P992L</i>                       | PAPMGCP     |
|       | Uterine Serous Carcinoma/Uterine Papillary Serous Carcinoma | <i>P992H</i>                       | PAPMGCP     |
|       | Endocervical Adenocarcinoma                                 | <i>P970H</i>                       | PYW         |
|       | Cutaneous Melanoma                                          | <i>E962*</i>                       | Truncation  |
| EphA7 | Cutaneous Melanoma                                          | <i>P903S</i>                       | PNSLKPT     |
|       | Cutaneous Melanoma                                          | <i>P903L</i>                       | PNSLKPT     |
|       | Rectal Adenocarcinoma                                       | <i>R895*</i>                       | Truncation  |



|       |                                                             |               |                      |
|-------|-------------------------------------------------------------|---------------|----------------------|
|       | Colon Adenocarcinoma                                        | <i>R895*</i>  | Truncation           |
|       | Cutaneous Melanoma                                          | <i>R895*</i>  | Truncation           |
|       | Uterine Endometrioid Carcinoma                              | <i>R895*</i>  | Truncation           |
|       | Uterine Endometrioid Carcinoma                              | <i>R895*</i>  | Truncation           |
|       | Uterine Endometrioid Carcinoma                              | <i>R895*</i>  | Truncation           |
|       | Uterine Endometrioid Carcinoma                              | <i>R895*</i>  | Truncation           |
|       | Uterine Endometrioid Carcinoma                              | <i>R895*</i>  | Truncation           |
| EphB1 | Uterine Endometrioid Carcinoma                              | <i>P898H</i>  | <b>PSQP</b>          |
|       | Lung Adenocarcinoma                                         | <i>P885A</i>  | <b>PAS</b>           |
| EphB3 | Breast Invasive Ductal Carcinoma                            | <i>P995S</i>  | <b>PVQV</b>          |
|       | Head and Neck Squamous Cell Carcinoma                       | <i>Q909*</i>  | Truncation           |
| EphB4 | Diffuse Type Stomach Adenocarcinoma                         | <i>P985T</i>  | <b>PAPQY</b>         |
|       | Renal Clear Cell Carcinoma                                  | <i>P985A</i>  | <b>PAPQY</b>         |
|       | Cervical Squamous Cell Carcinoma                            | <i>P977L</i>  | <b>PGTP</b>          |
| EphB6 | Lung Squamous Cell Carcinoma                                | <i>P942T</i>  | <b>PVALDFPCLDSP</b>  |
| RET   | Pancreatic Adenocarcinoma                                   | <i>P1070S</i> | <b>PNWPGESPVP</b>    |
|       | Cutaneous Melanoma                                          | <i>P1049S</i> | <b>PLPRALP</b>       |
| ROS1  | Uterine Endometrioid Carcinoma                              | <i>P2260S</i> | <b>IMP</b>           |
| LMTK1 | Cutaneous Melanoma                                          | <i>P1107S</i> | <b>PVPLRS</b>        |
|       | Cutaneous Melanoma                                          | <i>P1086S</i> | <b>PPEPQGP</b>       |
|       | Cutaneous Melanoma                                          | <i>P1086L</i> | <b>PPEPQGP</b>       |
|       | Renal Clear Cell Carcinoma                                  | <i>P1011T</i> | <b>PEK</b>           |
|       | Lung Squamous Cell Carcinoma                                | <i>P960H</i>  | <b>PQA</b>           |
|       | Cutaneous Melanoma                                          | <i>P922S</i>  | <b>PSATGP</b>        |
|       | Head and Neck Squamous Cell Carcinoma                       | <i>P888L</i>  | <b>PDVVP</b>         |
|       | Papillary Renal Cell Carcinoma                              | <i>P808T</i>  | <b>PSQEGALP</b>      |
|       | Lung Adenocarcinoma                                         | <i>P709H</i>  | <b>PSPKQTPRASP</b>   |
|       | Papillary Renal Cell Carcinoma                              | <i>P647T</i>  | <b>EPGYPGEP</b>      |
|       | Cutaneous Melanoma                                          | <i>P636S</i>  | <b>PAFFE DPLGTSP</b> |
|       | Colon Adenocarcinoma                                        | <i>P337S</i>  | <b>PYP</b>           |
| LMTK2 | Uterine Serous Carcinoma/Uterine Papillary Serous Carcinoma | <i>P1451A</i> | <b>PPPP</b>          |
|       | Cutaneous Melanoma                                          | <i>P1427L</i> | <b>PDPF</b>          |

|       |                                                             |               |                                          |
|-------|-------------------------------------------------------------|---------------|------------------------------------------|
|       | Cutaneous Melanoma                                          | <i>P1372T</i> | PTK                                      |
|       | Cutaneous Melanoma                                          | <i>P1346H</i> | PDPLP                                    |
|       | Colon Adenocarcinoma                                        | <i>P1317S</i> | PVPI                                     |
|       | Uterine Endometrioid Carcinoma                              | <i>P1180L</i> | PEP                                      |
|       | Cutaneous Melanoma                                          | <i>P1069S</i> | PPNP                                     |
|       | Cutaneous Melanoma                                          | <i>P887H</i>  | PFPASEP                                  |
|       | Cutaneous Melanoma                                          | <i>P842L</i>  | PTCLDVIVP                                |
|       | Cutaneous Melanoma                                          | <i>P631T</i>  | PESP                                     |
|       | Cutaneous Melanoma                                          | <i>P519L</i>  | PGPG                                     |
|       | Colon Adenocarcinoma                                        | <i>P445L</i>  | PIL                                      |
| LMTK3 | Breast Invasive Lobular Carcinoma                           | <i>P1457T</i> | PAGP                                     |
|       | Lung Squamous Cell Carcinoma                                | <i>P1438L</i> | PALETPGPPAR<br>AP                        |
|       | Bladder Urothelial Carcinoma                                | <i>P1425T</i> | PLLPPGPP                                 |
|       | Serous Ovarian Cancer                                       | <i>P1424S</i> | PLLPPGPP                                 |
|       | Renal Clear Cell Carcinoma                                  | <i>P1093S</i> | RAP                                      |
|       | Colon Adenocarcinoma                                        | <i>P1029S</i> | PGPWEKTP                                 |
|       | Head and Neck Squamous Cell Carcinoma                       | <i>P922S</i>  | PSLSLP                                   |
|       | Papillary Renal Cell Carcinoma                              | <i>P917T</i>  | PSLSLP                                   |
|       | Cervical Squamous Cell Carcinoma                            | <i>P845L</i>  | PRPRAPPEPPDP<br>GAPRPPDPGP<br>LPLPGPREKP |
| ALK   | Serous Ovarian Cancer                                       | <i>P1542Q</i> | PPNV                                     |
|       | Uterine Serous Carcinoma/Uterine Papillary Serous Carcinoma | <i>P1521S</i> | PTKKNNP                                  |
|       | Uterine Endometrioid Carcinoma                              | <i>P1521H</i> | PTKKNNP                                  |
|       | Colon Adenocarcinoma                                        | <i>R1464*</i> | Truncation                               |
|       | Uterine Mixed Endometrial Carcinoma                         | <i>R1464*</i> | Truncation                               |
|       | Uterine Endometrioid Carcinoma                              | <i>R1464*</i> | Truncation                               |
|       | Cutaneous Melanoma                                          | <i>P1398S</i> | PIEYGP                                   |
|       | Intestinal Type Stomach Adenocarcinoma                      | <i>P1398L</i> | PIEYGP                                   |
| LTK   | Lung Adenocarcinoma                                         | <i>P846T</i>  | PLGPWLSSGLKP                             |
|       | Cutaneous Melanoma                                          | <i>E800*</i>  | Truncation                               |
| STYK1 | Head and Neck Squamous Cell Carcinoma                       | <i>P401L</i>  | PELVVP                                   |
| EGFR  | Cutaneous Melanoma                                          | <i>P1178L</i> | PKEAKP                                   |

|       |                                                 |               |                                                                                                      |
|-------|-------------------------------------------------|---------------|------------------------------------------------------------------------------------------------------|
|       | Mixed Germ Cell Tumor                           | <i>P1178L</i> | <b>P</b> K <b>E</b> A <b>K</b> P                                                                     |
|       | Uterine Endometrioid Carcinoma                  | <i>P1123S</i> | PLNPAPSRD <b>P</b> H<br>YQDP                                                                         |
|       | Stomach Adenocarcinoma                          | <i>R1068*</i> | Truncation                                                                                           |
|       | Uterine Endometrioid Carcinoma                  | <i>R1068*</i> | Truncation                                                                                           |
|       | Lung Squamous Cell Carcinoma                    | <i>P1019L</i> | L <b>I</b> P <b>Q</b>                                                                                |
|       | Uterine Endometrioid Carcinoma                  | <i>Y1016*</i> | Truncation                                                                                           |
|       | Cutaneous Melanoma                              | <i>Q982*</i>  | Truncation                                                                                           |
|       | Cutaneous Melanoma                              | <i>Q982*</i>  | Truncation                                                                                           |
| ErbB2 | Esophageal Adenocarcinoma                       | <i>E1229*</i> | Truncation                                                                                           |
|       | Mucinous Adenocarcinoma of the Colon and Rectum | <i>P1227S</i> | <b>P</b> PERGAPP                                                                                     |
|       | Glioblastoma Multiforme                         | <i>P1199T</i> | PEYL <b>T</b> PQGGAA<br>PQPHPPAFSP                                                                   |
|       | Bladder Urothelial Carcinoma                    | <i>P1156H</i> | PDVRPQPPSPR<br>EG <b>L</b> PLAARP                                                                    |
| ErbB3 | Uterine Endometrioid Carcinoma                  | <i>P1326T</i> | <b>P</b> DYWH                                                                                        |
|       | Cutaneous Melanoma                              | <i>Q1301*</i> | Truncation                                                                                           |
|       | Renal Clear Cell Carcinoma                      | <i>R1267*</i> | Truncation                                                                                           |
|       | Cutaneous Melanoma                              | <i>P1256Q</i> | PVPIMPTAG <b>T</b> T <b>P</b>                                                                        |
|       | Papillary Renal Cell Carcinoma                  | <i>P1247L</i> | PV <b>P</b> IMPTAG <b>T</b> T <b>P</b>                                                               |
|       | Cutaneous Melanoma                              | <i>P1170L</i> | G <b>T</b> <b>P</b>                                                                                  |
|       | Cutaneous Melanoma                              | <i>P1162Q</i> | <b>P</b> DTHLKG <b>T</b> P                                                                           |
|       | Cutaneous Melanoma                              | <i>E1098*</i> | Truncation                                                                                           |
| ErbB4 | Cervical Squamous Cell Carcinoma                | <i>P1300L</i> | PGTVL <b>P</b> PP <b>P</b>                                                                           |
|       | Breast Invasive Ductal Carcinoma                | <i>P1292S</i> | <b>P</b> GT <b>V</b> L <b>P</b> PP <b>P</b>                                                          |
|       | Lung Squamous Cell Carcinoma                    | <i>E1283*</i> | Truncation                                                                                           |
|       | Cutaneous Melanoma                              | <i>P1282S</i> | P <b>I</b> V <b>A</b> E <b>N</b> <b>P</b>                                                            |
|       | Uterine Endometrioid Carcinoma                  | <i>E1280*</i> | Truncation                                                                                           |
|       | Uterine Endometrioid Carcinoma                  | <i>D1238*</i> | Truncation                                                                                           |
|       | Lung Adenocarcinoma                             | <i>P1206L</i> | PP <b>K</b> A <b>E</b> D <b>E</b> Y <b>V</b> N <b>E</b> <b>P</b>                                     |
|       | Lung Adenocarcinoma                             | <i>Q1181*</i> | Truncation                                                                                           |
|       | Cutaneous Melanoma                              | <i>P1165L</i> | PM <b>R</b> D <b>K</b> P <b>K</b> Q <b>E</b> Y <b>L</b><br>N <b>P</b> <b>V</b> E <b>E</b> N <b>P</b> |
|       | Lung Adenocarcinoma                             | <i>E1148*</i> | Truncation                                                                                           |
|       | Head and Neck Squamous Cell Carcinoma           | <i>P1137A</i> | PT <b>V</b> F <b>A</b> <b>P</b> E <b>R</b> S <b>P</b>                                                |

|  |                                                 |               |               |
|--|-------------------------------------------------|---------------|---------------|
|  | Intestinal Type Stomach Adenocarcinoma          | <i>P1132S</i> | PTVFAPERSP    |
|  | Lung Adenocarcinoma                             | <i>Q1126*</i> | Truncation    |
|  | Cutaneous Melanoma                              | <i>P1117L</i> | PVAP          |
|  | Mucinous Adenocarcinoma of the Colon and Rectum | <i>C1106*</i> | Truncation    |
|  | Lung Squamous Cell Carcinoma                    | <i>P1092S</i> | PYRAPTSTIPEAP |
|  | Uterine Endometrioid Carcinoma                  | <i>P1080S</i> | PYRAPTSTIPEAP |
|  | Cutaneous Melanoma                              | <i>Q1063*</i> | Truncation    |
|  | Renal Clear Cell Carcinoma                      | <i>P1054H</i> | PPPAYTP       |
|  | Cutaneous Melanoma                              | <i>P1053L</i> | PPPAYTP       |
|  | Leiomyosarcoma                                  | <i>S1043*</i> | Truncation    |
|  | Bladder Urothelial Carcinoma                    | <i>P1031L</i> | PQAFNIPPP     |
|  | Cutaneous Melanoma                              | <i>P998Q</i>  | PSPN          |
